# Supplementary material for: Photocatalytic sequential C–H functionalization expediting acetoxymalonylation of imidazo heterocycles
Source: publisher site journal article supplement (doi:10.3762/bjoc.19.48), 2023-05-12

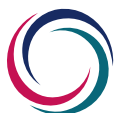

## Supporting Information

for

### Photocatalytic sequential C–H functionalization expediting acetoxymalonylation of imidazo heterocycles

Deepak Singh, Shyamal Pramanik and Soumitra Maity

*Beilstein J. Org. Chem.* **2023**, *19*, 666–673. [doi:10.3762/bjoc.19.48](https://doi.org/10.3762/bjoc.19.48)

### Experimental section and characterization of synthesized compounds

---

| <b>Table of contents</b> |                                                            | <i>Page</i> |
|--------------------------|------------------------------------------------------------|-------------|
| 1.                       | General                                                    | S2          |
| 2.                       | Preparation of starting materials                          | S3          |
| 3.                       | Reaction optimization                                      | S3          |
| 4.                       | Experimental procedures and compound characterization data | S4          |
| 5.                       | Mechanistic studies and control experiments                | S14         |
| 6.                       | X-ray crystallographic data of compound <b>4d</b>          | S19         |
| 7.                       | NMR spectra                                                | S21         |

---

## 1. General

All commercially available chemicals and reagents were used without further purification unless otherwise stated. Solvents for extraction or column chromatography were of technical quality. All water used was purified via a Merck Millipore reverse osmosis purification system prior to use. All reactions were performed in oven-dried glassware under a positive pressure of nitrogen with freshly distilled anhydrous solvents.<sup>1</sup> Solvents were transferred via syringe and were introduced into the reaction vessels through a rubber septum. Solvents were removed under reduced pressure using IKA and Büchi rotary evaporator.

**Thin-layer chromatography (TLC):** The progress of the reaction was monitored by thin-layer chromatography (TLC) using SiO<sub>2</sub>-60 UV254 coated aluminum sheets (Merck, TLC Silica gel 60 F<sub>254</sub>). Visualization was achieved using UV light, iodine, and/or chemical staining with vanillin or basic potassium permanganate solutions as appropriate.

**Flash column chromatography (FC):** Purification of reaction mixtures was carried out with flash column chromatography on silica gel 230–400 mesh (Merck, 37–63 µm). Solvents for extraction and chromatography were of technical quality. Eluting solvent mixtures are individually reported in parenthesis.

**NMR spectra:** Proton, carbon, and fluorine nuclear magnetic resonance (<sup>1</sup>H, <sup>13</sup>C, and <sup>19</sup>F NMR) spectra were recorded on a Bruker Avance III HD (400, 101, and 377 MHz) spectrometer at 25 °C. Chemical shifts (δ) are given in ppm and reported as follows: multiplicity (s (singlet), d (doublet), t (triplet), q (quartet), dd (doublet of doublets), dt (doublet of triplets), and m (multiplet)), coupling constants (J) in Hz, number of protons; suggested assignment. The residual deuterated solvent was used as internal standard (CDCl<sub>3</sub>: δ<sub>H</sub> = 7.26 ppm; δ<sub>C</sub> = 77.16 ppm).

**Melting point (Mp):** Melting points were measured using Tempstar melting point instrument Remco-Kolkata apparatus using open glass capillaries and are reported uncorrected.

**High-resolution mass spectrometry (HRMS):** HRMS were recorded using a QTOF micro MS system by ESI technique.

**GC–MS:** GC–MS analysis was done by a Thermo Scientific ISQ 7000 single quadrupole mass spectrometer fitted with TRACE 1310 gas chromatograph using a TG-5MS column (30 m × 0.25 mm × 0.25 µm).

**Photoreactions:** Photoreactions were carried out in borosilicate made culture tube using light source (PAR38 12W blue LED bulb / Kessil violet LEDs 390 nm).

**UV–vis spectroscopy:** UV–vis absorption spectra were recorded using a Shimadzu UV Spectrophotometer (model: UV-1800).

**Luminescence spectrometer:** Fluorescence quenching studies were carried out using a Shimadzu RF-6000 spectrophotometer (model no.- A40246002251SA).

---

<sup>1</sup> W. L. F. Armarego, C. Chai. *Purification of Laboratory Chemicals*; 7th ed. Butterworth-Heinemann: Oxford, 2012.

## 2. Preparation of starting materials

**2.1. General procedure for the synthesis of 2-arylimidazo[1,2-*a*]pyridines:** All 2-arylimidazo[1,2-*a*]pyridines were prepared either from the corresponding methyl ketone and 2-aminopyridines (or compounds **1a–q** and **w** also prepared following the same procedure),<sup>2</sup> or from the corresponding 2-bromoacetophenone and 2-aminopyridines (for compounds **1r**,<sup>3</sup> **1u**<sup>4</sup> and **v**<sup>5</sup>) following the reported procedure.

## 3. Reaction optimization <sup>a</sup>:

**General procedure for optimization of reaction conditions:** An oven-dried culture tube equipped with a magnetic stirring bar was charged with 2-phenylimidazo[1,2-*a*]pyridine (**1a**, 39 mg, 0.2 mmol, 1.0 equiv), diethyl bromomalonate (**2a**, 96 mg, 0.4 mmol, 2.0 equiv), photocatalyst (5 mol %), additive (0.4 mmol, 2.0 equiv), and dry solvent (2 mL). The resulting reaction mixture was stirred at room temperature under open atmosphere conditions using 12 W blue LEDs or 390 nm violet LEDs for 10 h. A fan cooling was also included to maintain the reaction at room temperature.

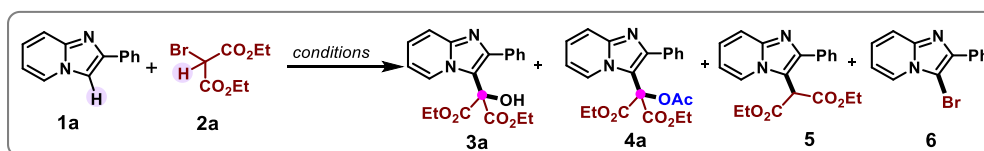

| entry           | catalyst    | solvent            | additive             | yield (%) <sup>b</sup><br><b>3a: 4a: 5: 6</b> |
|-----------------|-------------|--------------------|----------------------|-----------------------------------------------|
| 1 <sup>c</sup>  | 4-CzIPN     | CH <sub>3</sub> CN | -                    | 0: 0: 54: 28                                  |
| 2               | 4-CzIPN     | CH <sub>3</sub> CN | -                    | 47: 0: 0: 22                                  |
| 3               | 4-CzIPN     | CH <sub>3</sub> CN | Zn(OAc) <sub>2</sub> | 0: 38: 0: 0                                   |
| 4               | Rose Bengal | CH <sub>3</sub> CN | Zn(OAc) <sub>2</sub> | -                                             |
| 5               | Eosin-Y     | CH <sub>3</sub> CN | Zn(OAc) <sub>2</sub> | -                                             |
| 6               | Rhodamine-B | CH <sub>3</sub> CN | Zn(OAc) <sub>2</sub> | -                                             |
| 7 <sup>d</sup>  | PTH         | CH <sub>3</sub> CN | Zn(OAc) <sub>2</sub> | 0: 52: 0: 0                                   |
| 8               | PTH         | 1,4-dioxane        | Zn(OAc) <sub>2</sub> | 0: 34: 0: 0                                   |
| 9               | PTH         | DMF                | Zn(OAc) <sub>2</sub> | 0: 25: 0: 0                                   |
| 10              | PTH         | Toluene            | Zn(OAc) <sub>2</sub> | 0: 18: 0: 0                                   |
| 11              | PTH         | 1,2-DCE            | Zn(OAc) <sub>2</sub> | 0: 70: 0: 0                                   |
| 12 <sup>e</sup> | PTH         | 1,2-DCE            | Zn(OAc) <sub>2</sub> | 0: 94: 0: 0                                   |
| 13 <sup>f</sup> | PTH         | 1,2-DCE            | Zn(OAc) <sub>2</sub> | 0: 52: 0: 0                                   |
| 14 <sup>g</sup> | PTH         | 1,2-DCE            | Zn(OAc) <sub>2</sub> | 0: 88: 0: 0                                   |
| 15              | PTH         | 1,2-DCE            | AcOH                 | 0: 64: 0: 0                                   |
| 16              | -           | 1,2-DCE            | Zn(OAc) <sub>2</sub> | -                                             |
| 17 <sup>h</sup> | PTH         | 1,2-DCE            | Zn(OAc) <sub>2</sub> | -                                             |

<sup>2</sup> Mohan, D. C.; Donthiri, R. R.; Rao, S. N.; Adimurthy, S. *Adv. Syn. Cat.* **2013**, 355, 2217.

<sup>3</sup> Cai, S.; Yang, X.; Chen, P.; Liu, X.; Zhou, J.; Zhang, H. *Bioorg. Chem.* **2020**, 94, 103356.

<sup>4</sup> Baig, M. F.; Nayak, V. L.; Budaganaboyina, P.; Mullagiri, K.; Sunkari, S.; Gour, J.; Kamal, A. *Bioorg. Chem.* **2018**, 77, 515.

<sup>5</sup> Mishra, S.; Monir, K.; Mitra, S.; Hajra, A. *Org. Lett.* **2014**, 16, 6084.

|                 |     |         |                      |                |
|-----------------|-----|---------|----------------------|----------------|
| 18              | PTH | 1,2-DCE | -                    | 57: 0: 0: 24   |
| 19 <sup>i</sup> | PTH | 1,2-DCE | Zn(OAc) <sub>2</sub> | -              |
| 20 <sup>j</sup> | PTH | 1,2-DCE | Zn(OAc) <sub>2</sub> | -              |
| 21 <sup>k</sup> | PTH | 1,2-DCE | Zn(OAc) <sub>2</sub> | 0: trace: 0: 0 |

<sup>a</sup>Reaction conditions: **1a** (0.2 mmol), **2a** (0.4 mmol), catalyst (5 mol %), additive (0.4 mmol) in dry solvent (2 mL) under aerobic conditions, irradiation with 12 W blue LEDs for 10 h. <sup>b</sup>Isolated yield. <sup>c</sup>Under N<sub>2</sub> atmosphere. <sup>d</sup>Irradiation with violet LEDs ( $\lambda_{\max}$ = 390 nm), <sup>e</sup>3.0 equiv of zinc acetate used. <sup>f</sup>2 mol % catalyst used. <sup>g</sup>10 mol % catalyst used. <sup>h</sup>In the dark, without light source. <sup>i</sup>Blue LEDs used as light source. <sup>j</sup>Green LEDs used as light source. <sup>k</sup>Using house hold white CFL bulb as light source.

## 4. Experimental procedures & compound characterization data

**4.1. General procedure for the synthesis of acetoxy-malonated imidazo-heterocycles:** An oven-dried culture tube equipped with a magnetic stirring bar was charged with 2-substituted imidazo-heterocycles **1** (0.2 mmol, 1.0 equiv), active bromo-methylene **2** (0.4 mmol, 2.0 equiv), additive Zn(OAc)<sub>2</sub> (132 mg, 0.6 mmol, 3.0 equiv) and photocatalyst **PTH** (5 mol %) in dry 1,2-DCE (2 mL). The resulting reaction mixture was stirred at room temperature under open atmosphere using 390 nm violet LEDs for 10 h. A fan cooling was also included to maintain the reaction at room temperature. Completion of the reaction was confirmed by TLC. Then, the crude reaction mixture was poured into H<sub>2</sub>O (10 mL) and extracted with CH<sub>2</sub>Cl<sub>2</sub> (3 × 6 mL). The combined organic layer was washed with brine solution and dried using oven dried anhydrous Na<sub>2</sub>SO<sub>4</sub>. Then the mixture was concentrated in a rotary evaporator under reduced pressure. The crude residue was then purified by column chromatography to obtain the desired product **4**.

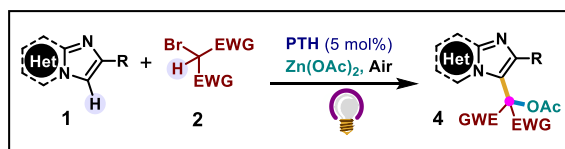

## 4.2. Compound characterization data

| Diethyl 2-acetoxy-2-(2-phenylimidazo[1,2- <i>a</i> ]pyridin-3-yl)malonate ( <b>4a</b> ):                                                                                                                                                                                                                                                                                        |                                              |
|---------------------------------------------------------------------------------------------------------------------------------------------------------------------------------------------------------------------------------------------------------------------------------------------------------------------------------------------------------------------------------|----------------------------------------------|
| <b>Yield:</b> 94% (77 mg).<br><b>Nature:</b> yellow solid<br><b>Mp:</b> 121-123 °C<br><b>R<sub>f</sub> value</b> = 0.2 [EtOAc: Petroleum ether = 3:7 (v/v)].                                                                                                                                                                                                                    | <p style="text-align: center;"><b>4a</b></p> |
| <sup>1</sup> H NMR (400 MHz, CDCl <sub>3</sub> ) $\delta$ (ppm): 8.28 (dd, <i>J</i> = 4.6, 3.5 Hz, 1H), 7.73 (d, <i>J</i> = 9.1 Hz, 1H), 7.60 – 7.58 (m, 2H), 7.41 (d, <i>J</i> = 7.1 Hz, 3H), 7.33 (ddd, <i>J</i> = 9.1, 6.8, 1.1 Hz, 1H), 6.90 (td, <i>J</i> = 6.9, 1.2 Hz, 1H), 3.88 (tdd, <i>J</i> = 10.7, 7.1, 3.6 Hz, 4H), 2.14 (s, 3H), 1.13 (t, <i>J</i> = 7.1 Hz, 6H). |                                              |
| <sup>13</sup> C{ <sup>1</sup> H} NMR (101 MHz, CDCl <sub>3</sub> ) $\delta$ (ppm): 168.8, 164.2, 146.0, 145.1, 133.7, 130.3, 128.7, 127.9, 126.4, 126.3, 117.8, 113.4, 113.3, 80.0, 63.3, 20.5, 13.8.                                                                                                                                                                           |                                              |
| <b>HRMS</b> (ESI) <i>m/z</i> calcd for C <sub>22</sub> H <sub>23</sub> N <sub>2</sub> O <sub>6</sub> [M+H] <sup>+</sup> : 411.1556; found: 411.1554                                                                                                                                                                                                                             |                                              |

| <b>Diethyl 2-acetoxy-2-(2-(<i>p</i>-tolyl)imidazo[1,2-<i>a</i>]pyridin-3-yl)malonate (4b):</b>                                                                                                                                                                                                                                                                                                                                                                                                                                                                                                                                                                                                                                           |                                                                                     |
|------------------------------------------------------------------------------------------------------------------------------------------------------------------------------------------------------------------------------------------------------------------------------------------------------------------------------------------------------------------------------------------------------------------------------------------------------------------------------------------------------------------------------------------------------------------------------------------------------------------------------------------------------------------------------------------------------------------------------------------|-------------------------------------------------------------------------------------|
| <b>Yield:</b> 95% (81 mg).<br><b>Nature:</b> white solid<br><b>Mp:</b> 168-170 °C<br><b>R<sub>f</sub> value</b> = 0.2 [EtOAc: Petroleum ether = 3:7 (v/v)].                                                                                                                                                                                                                                                                                                                                                                                                                                                                                                                                                                              | 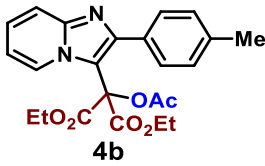 |
| <b><sup>1</sup>H NMR (400 MHz, CDCl<sub>3</sub>) δ (ppm):</b> 8.27 (d, <i>J</i> = 7.1 Hz, 1H), 7.73 (d, <i>J</i> = 9.0 Hz, 1H), 7.48 (d, <i>J</i> = 8.1 Hz, 2H), 7.32 (ddd, <i>J</i> = 8.8, 6.7, 1.0 Hz, 1H), 7.22 (d, <i>J</i> = 7.9 Hz, 2H), 6.89 (td, <i>J</i> = 6.9, 1.2 Hz, 1H), 3.94 – 3.85 (m, 4H), 2.38 (s, 3H), 2.14 (s, 3H), 1.13 (t, <i>J</i> = 7.1 Hz, 6H).<br><b><sup>13</sup>C{<sup>1</sup>H} NMR (101 MHz, CDCl<sub>3</sub>) δ (ppm):</b> 168.8, 164.2, 146.1, 145.0, 138.5, 130.6, 130.2, 128.5, 126.4, 126.2, 117.7, 113.3, 113.2, 80.1, 63.3, 21.5, 20.5, 13.8.<br><b>HRMS (ESI) <i>m/z</i></b> calcd for C <sub>23</sub> H <sub>25</sub> N <sub>2</sub> O <sub>6</sub> [M+H] <sup>+</sup> : 425.1713; found: 425.1710 |                                                                                     |

| <b>Diethyl 2-acetoxy-2-(2-(4-bromophenyl)imidazo[1,2-<i>a</i>]pyridin-3-yl)malonate (4c):</b>                                                                                                                                                                                                                                                                                                                                                                                                                                                                                                                                                                                                              |                                                                                      |
|------------------------------------------------------------------------------------------------------------------------------------------------------------------------------------------------------------------------------------------------------------------------------------------------------------------------------------------------------------------------------------------------------------------------------------------------------------------------------------------------------------------------------------------------------------------------------------------------------------------------------------------------------------------------------------------------------------|--------------------------------------------------------------------------------------|
| <b>Yield:</b> 92% (90 mg).<br><b>Nature:</b> white solid<br><b>Mp:</b> 160-162 °C<br><b>R<sub>f</sub> value</b> = 0.2 [EtOAc: Petroleum ether = 3:7 (v/v)].                                                                                                                                                                                                                                                                                                                                                                                                                                                                                                                                                | 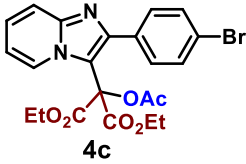 |
| <b><sup>1</sup>H NMR (400 MHz, CDCl<sub>3</sub>) δ (ppm):</b> 8.27 (dd, <i>J</i> = 8.1, 0.9 Hz, 1H), 7.70 (dd, <i>J</i> = 5.6, 4.5 Hz, 1H), 7.57 – 7.54 (m, 2H), 7.49 – 7.46 (m, 2H), 7.33 (ddd, <i>J</i> = 9.1, 6.8, 1.1 Hz, 1H), 6.90 (td, <i>J</i> = 6.9, 1.2 Hz, 1H), 3.98 – 3.89 (m, 4H), 2.14 (s, 3H), 1.14 (t, <i>J</i> = 7.1 Hz, 6H).<br><b><sup>13</sup>C{<sup>1</sup>H} NMR (101 MHz, CDCl<sub>3</sub>) δ (ppm):</b> 168.7, 164.1, 145.3, 144.9, 132.9, 131.9, 131.0, 126.4, 126.3, 123.1, 117.8, 113.5, 113.3, 79.9, 63.4, 20.5, 13.8.<br><b>HRMS (ESI) <i>m/z</i></b> calcd for C <sub>22</sub> H <sub>22</sub> BrN <sub>2</sub> O <sub>6</sub> [M+H] <sup>+</sup> : 489.0661; found: 489.0668 |                                                                                      |

| <b>Diethyl 2-acetoxy-2-(2-(4-fluorophenyl)imidazo[1,2-<i>a</i>]pyridin-3-yl)malonate (4d):</b>                                                                                                                                                                                                                                                                                                                                                                                                                                                                                                                                                                                                                                                                                                                                                                                               |                                                                                       |
|----------------------------------------------------------------------------------------------------------------------------------------------------------------------------------------------------------------------------------------------------------------------------------------------------------------------------------------------------------------------------------------------------------------------------------------------------------------------------------------------------------------------------------------------------------------------------------------------------------------------------------------------------------------------------------------------------------------------------------------------------------------------------------------------------------------------------------------------------------------------------------------------|---------------------------------------------------------------------------------------|
| <b>Yield:</b> 81% (70 mg).<br><b>Nature:</b> white solid<br><b>Mp:</b> 134-136 °C<br><b>R<sub>f</sub> value</b> = 0.2 [EtOAc: Petroleum ether = 3:7 (v/v)].                                                                                                                                                                                                                                                                                                                                                                                                                                                                                                                                                                                                                                                                                                                                  | 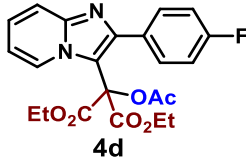 |
| <b><sup>1</sup>H NMR (400 MHz, CDCl<sub>3</sub>) δ (ppm):</b> 8.26 (d, <i>J</i> = 7.2 Hz, 1H), 7.68 (d, <i>J</i> = 9.1 Hz, 1H), 7.57 (dd, <i>J</i> = 8.7, 5.5 Hz, 2H), 7.31 (ddd, <i>J</i> = 8.9, 6.7, 1.0 Hz, 1H), 7.10 (t, <i>J</i> = 8.7 Hz, 2H), 6.88 (td, <i>J</i> = 7.0, 1.1 Hz, 1H), 3.97 – 3.87 (m, 4H), 2.14 (s, 3H), 1.14 (t, <i>J</i> = 7.2 Hz, 6H).<br><b><sup>13</sup>C{<sup>1</sup>H} NMR (101 MHz, CDCl<sub>3</sub>) δ (ppm):</b> 168.8, 164.2, 163.1 (d, <i>J</i> = 248.8 Hz), 145.3 (d, <i>J</i> = 4.2 Hz), 132.1 (d, <i>J</i> = 8.6 Hz), 130.1, 126.3 (d, <i>J</i> = 21.3 Hz), 117.8, 114.9, 114.7, 113.4, 113.2, 79.9, 63.3, 20.5, 13.8.<br><b><sup>19</sup>F NMR (376 MHz, CDCl<sub>3</sub>) δ (ppm):</b> -113.1<br><b>HRMS (ESI) <i>m/z</i></b> calcd for C <sub>22</sub> H <sub>22</sub> FN <sub>2</sub> O <sub>6</sub> [M+H] <sup>+</sup> : 429.1462; found: 429.1461 |                                                                                       |

| Diethyl 2-acetoxy-2-(2-(4-chlorophenyl)imidazo[1,2- <i>a</i> ]pyridin-3-yl)malonate (4e):                                                                                                                                                                                                                                                                                                                                                                                                                                                                                                                                                                                                        |                                                                                                                                  |
|--------------------------------------------------------------------------------------------------------------------------------------------------------------------------------------------------------------------------------------------------------------------------------------------------------------------------------------------------------------------------------------------------------------------------------------------------------------------------------------------------------------------------------------------------------------------------------------------------------------------------------------------------------------------------------------------------|----------------------------------------------------------------------------------------------------------------------------------|
| <p><b>Yield:</b> 89% (79 mg).</p> <p><b>Nature:</b> white solid</p> <p><b>Mp:</b> 158-160 °C</p> <p><b>R<sub>f</sub> value</b> = 0.2 [EtOAc: Petroleum ether = 3:7 (v/v)].</p>                                                                                                                                                                                                                                                                                                                                                                                                                                                                                                                   | 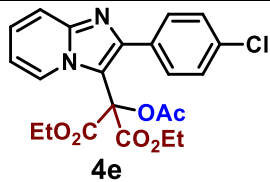 <p style="text-align: center;"><b>4e</b></p> |
| <p><b><sup>1</sup>H NMR (400 MHz, CDCl<sub>3</sub>) δ (ppm):</b> 8.28 – 8.26 (m, 1H), 7.68 (dd, <i>J</i> = 10.0, 0.9 Hz, 1H), 7.55 – 7.52 (m, 2H), 7.41 – 7.38 (m, 2H), 7.31 (ddd, <i>J</i> = 9.1, 6.8, 1.2 Hz, 1H), 6.89 (td, <i>J</i> = 6.9, 1.2 Hz, 1H), 3.97 – 3.89 (m, 4H), 2.14 (s, 3H), 1.14 (t, <i>J</i> = 7.1 Hz, 6H).</p> <p><b><sup>13</sup>C{<sup>1</sup>H} NMR (101 MHz, CDCl<sub>3</sub>) δ (ppm):</b> 168.7, 164.1, 145.3, 145.0, 134.8, 132.6, 131.63, 128.0, 126.4, 126.3, 117.9, 113.5, 113.2, 79.9, 63.4, 20.5, 13.8.</p> <p><b>HRMS (ESI) <i>m/z</i> calcd for C<sub>22</sub>H<sub>22</sub>ClN<sub>2</sub>O<sub>6</sub> [M+H]<sup>+</sup>:</b> 445.1166; found: 445.1165</p> |                                                                                                                                  |

| Diethyl 2-acetoxy-2-(2-(4-cyanophenyl)imidazo[1,2- <i>a</i> ]pyridin-3-yl)malonate (4f):                                                                                                                                                                                                                                                                                                                                                                                                                                                                                                                                                |                                                                                                                                   |
|-----------------------------------------------------------------------------------------------------------------------------------------------------------------------------------------------------------------------------------------------------------------------------------------------------------------------------------------------------------------------------------------------------------------------------------------------------------------------------------------------------------------------------------------------------------------------------------------------------------------------------------------|-----------------------------------------------------------------------------------------------------------------------------------|
| <p><b>Yield:</b> 79% (69 mg).</p> <p><b>Nature:</b> yellow solid</p> <p><b>Mpt:</b> 133-135 °C</p> <p><b>R<sub>f</sub> value</b> = 0.2 [EtOAc: Petroleum ether = 3:7 (v/v)].</p>                                                                                                                                                                                                                                                                                                                                                                                                                                                        | 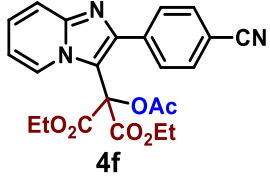 <p style="text-align: center;"><b>4f</b></p> |
| <p><b><sup>1</sup>H NMR (400 MHz, CDCl<sub>3</sub>) δ (ppm):</b> 8.33 – 8.31 (m, 1H), 7.79 – 7.72 (m, 5H), 7.40 (ddd, <i>J</i> = 8.8, 6.9, 1.0 Hz, 1H), 6.97 (td, <i>J</i> = 6.9, 1.1 Hz, 1H), 3.99 – 3.91 (m, 4H), 2.12 (s, 3H), 1.15 (t, <i>J</i> = 7.2 Hz, 6H).</p> <p><b><sup>13</sup>C{<sup>1</sup>H} NMR (101 MHz, CDCl<sub>3</sub>) δ (ppm):</b> 168.6, 163.9, 145.1, 143.5, 138.4, 131.7, 131.1, 127.2, 126.6, 118.7, 117.8, 114.2, 113.9, 112.5, 79.6, 63.6, 20.4, 13.8.</p> <p><b>HRMS (ESI) <i>m/z</i> calcd for C<sub>23</sub>H<sub>22</sub>N<sub>3</sub>O<sub>6</sub> [M+H]<sup>+</sup>:</b> 436.1509; found: 436.1503</p> |                                                                                                                                   |

| Diethyl 2-acetoxy-2-(2-(4-methoxyphenyl)imidazo[1,2- <i>a</i> ]pyridin-3-yl)malonate (4g):                                                                                                                                                                                                                                                                                                                                                                                                                                                                                                                                                                                                       |                                                                                                                                    |
|--------------------------------------------------------------------------------------------------------------------------------------------------------------------------------------------------------------------------------------------------------------------------------------------------------------------------------------------------------------------------------------------------------------------------------------------------------------------------------------------------------------------------------------------------------------------------------------------------------------------------------------------------------------------------------------------------|------------------------------------------------------------------------------------------------------------------------------------|
| <p><b>Yield:</b> 85% (75 mg).</p> <p><b>Nature:</b> white solid</p> <p><b>Mp:</b> 177-179 °C</p> <p><b>R<sub>f</sub> value</b> = 0.2 [EtOAc: Petroleum ether = 3:7 (v/v)].</p>                                                                                                                                                                                                                                                                                                                                                                                                                                                                                                                   | 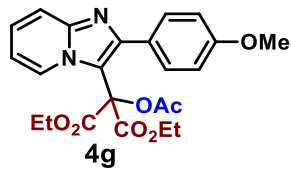 <p style="text-align: center;"><b>4g</b></p> |
| <p><b><sup>1</sup>H NMR (400 MHz, CDCl<sub>3</sub>) δ (ppm):</b> 8.34 (d, <i>J</i> = 7.1 Hz, 1H), 8.01 (d, <i>J</i> = 8.0 Hz, 1H), 7.58 – 7.56 (m, 2H), 7.51 – 7.47 (m, 1H), 7.04 (t, <i>J</i> = 7.0 Hz, 1H), 7.00 – 6.96 (m, 2H), 3.99 – 3.90 (m, 4.3 Hz, 4H), 3.85 (s, 3H), 2.16 (s, 3H), 1.15 (t, <i>J</i> = 7.2 Hz, 6H).</p> <p><b><sup>13</sup>C{<sup>1</sup>H} NMR (101 MHz, CDCl<sub>3</sub>) δ (ppm):</b> 168.8, 164.3, 160.0, 146.0, 145.2, 131.5, 126.4, 126.2, 126.0, 117.7, 113.3, 113.2, 113.0, 80.1, 63.3, 55.5, 20.5, 13.8.</p> <p><b>HRMS (ESI) <i>m/z</i> calcd for C<sub>23</sub>H<sub>25</sub>N<sub>2</sub>O<sub>7</sub> [M+H]<sup>+</sup>:</b> 441.1662; found: 441.1677</p> |                                                                                                                                    |

| Diethyl 2-acetoxy-2-(2-(2-fluorophenyl)imidazo[1,2- <i>a</i> ]pyridin-3-yl)malonate (4h):                                                                                                                                                                                                                                                                                                                                                                                                                                                                                                                                                                                                                                                                                                                                                                                                                                                                                                                                           |  |
|-------------------------------------------------------------------------------------------------------------------------------------------------------------------------------------------------------------------------------------------------------------------------------------------------------------------------------------------------------------------------------------------------------------------------------------------------------------------------------------------------------------------------------------------------------------------------------------------------------------------------------------------------------------------------------------------------------------------------------------------------------------------------------------------------------------------------------------------------------------------------------------------------------------------------------------------------------------------------------------------------------------------------------------|--|
| <p><b>Yield:</b> 93% (80 mg).</p> <p><b>Nature:</b> yellow solid</p> <p><b>Mp:</b> 94-96 °C</p> <p><b>R<sub>f</sub> value</b> = 0.2 [EtOAc: Petroleum ether = 3:7 (v/v)].</p>                                                                                                                                                                                                                                                                                                                                                                                                                                                                                                                                                                                                                                                                                                                                                                                                                                                       |  |
| <p><b><sup>1</sup>H NMR (400 MHz, CDCl<sub>3</sub>) δ (ppm):</b> 8.32 – 8.30 (m, 1H), 7.74 (d, <i>J</i> = 9.0 Hz, 1H), 7.46 (td, <i>J</i> = 7.4, 1.8 Hz, 1H), 7.39 (tdd, <i>J</i> = 7.2, 5.1, 1.8 Hz, 1H), 7.33 (ddd, <i>J</i> = 8.8, 6.8, 1.0 Hz, 1H), 7.17 (ddd, <i>J</i> = 18.5, 8.6, 0.9 Hz, 2H), 6.91 (td, <i>J</i> = 7.0, 1.1 Hz, 1H), 3.92 (bs, 4H), 2.06 (s, 3H), 1.14 (t, <i>J</i> = 7.1 Hz, 6H).</p> <p><b><sup>13</sup>C{<sup>1</sup>H} NMR (101 MHz, CDCl<sub>3</sub>) δ (ppm):</b> 168.8, 164.2, 160.7 (d, <i>J</i> = 249.5 Hz), 145.5, 140.1, 132.9 (d, <i>J</i> = 2.0 Hz), 130.7 (d, <i>J</i> = 8.4 Hz), 126.1 (d, <i>J</i> = 10.4 Hz), 123.4 (d, <i>J</i> = 3.2 Hz), 122.3 (d, <i>J</i> = 15.9 Hz), 118.0, 115.4 (d, <i>J</i> = 21.7 Hz), 114.7, 113.2, 79.8, 63.2, 20.3, 13.7.</p> <p><b><sup>19</sup>F NMR (376 MHz, CDCl<sub>3</sub>) δ (ppm):</b> –112.4</p> <p><b>HRMS (ESI) <i>m/z</i> calcd for C<sub>22</sub>H<sub>22</sub>FN<sub>2</sub>O<sub>6</sub> [M+H]<sup>+</sup>:</b> 429.1462; found: 429.1464</p> |  |

| Diethyl 2-acetoxy-2-(2-(3-bromophenyl)imidazo[1,2- <i>a</i> ]pyridin-3-yl)malonate (4i):                                                                                                                                                                                                                                                                                                                                                                                                                                                                                                                                                                                                                          |  |
|-------------------------------------------------------------------------------------------------------------------------------------------------------------------------------------------------------------------------------------------------------------------------------------------------------------------------------------------------------------------------------------------------------------------------------------------------------------------------------------------------------------------------------------------------------------------------------------------------------------------------------------------------------------------------------------------------------------------|--|
| <p><b>Yield:</b> 74% (73 mg).</p> <p><b>Nature:</b> yellow gummy liquid</p> <p><b>R<sub>f</sub> value</b> = 0.2 [EtOAc: Petroleum ether = 3:7 (v/v)].</p>                                                                                                                                                                                                                                                                                                                                                                                                                                                                                                                                                         |  |
| <p><b><sup>1</sup>H NMR (400 MHz, CDCl<sub>3</sub>) δ (ppm):</b> 8.30 – 8.28 (m, 1H), 7.77 (t, <i>J</i> = 1.8 Hz, 1H), 7.71 (dd, <i>J</i> = 5.5, 4.5 Hz, 1H), 7.54 (ddt, <i>J</i> = 6.7, 3.1, 1.0 Hz, 2H), 7.35 – 7.30 (m, 2H), 6.90 (td, <i>J</i> = 6.9, 1.3 Hz, 1H), 3.96 (m, 4H), 2.14 (s, 3H), 1.19 (t, <i>J</i> = 7.1 Hz, 6H).</p> <p><b><sup>13</sup>C{<sup>1</sup>H} NMR (101 MHz, CDCl<sub>3</sub>) δ (ppm):</b> 168.7, 164.2, 145.3, 144.5, 136.0, 133.3, 131.6, 129.5, 128.9, 126.4, 126.3, 121.8, 117.9, 113.7, 113.4, 79.8, 63.5, 20.4, 13.8.</p> <p><b>HRMS (ESI) <i>m/z</i> calcd for C<sub>22</sub>H<sub>22</sub>BrN<sub>2</sub>O<sub>6</sub> [M+H]<sup>+</sup>:</b> 489.0661; found: 489.0695</p> |  |

| Diethyl 2-(2-([1,1'-biphenyl]-4-yl)imidazo[1,2- <i>a</i> ]pyridin-3-yl)-2-acetoxymalonate (4j):                                                                                                                                                                                                                    |  |
|--------------------------------------------------------------------------------------------------------------------------------------------------------------------------------------------------------------------------------------------------------------------------------------------------------------------|--|
| <p><b>Yield:</b> 77% (75 mg).</p> <p><b>Nature:</b> white solid</p> <p><b>Mp:</b> 197-199 °C</p> <p><b>R<sub>f</sub> value</b> = 0.2 [EtOAc: Petroleum ether = 3:7 (v/v)].</p>                                                                                                                                     |  |
| <p><b><sup>1</sup>H NMR (400 MHz, CDCl<sub>3</sub>) δ (ppm):</b> 8.30 – 8.28 (m, 1H), 7.73 – 7.71 (m, 1H), 7.68 (s, 4H), 7.66 – 7.63 (m, 2H), 7.46 (t, <i>J</i> = 7.5 Hz, 2H), 7.39 – 7.30 (m, 2H), 6.90 (td, <i>J</i> = 6.9, 1.2 Hz, 1H), 3.97 – 3.88 (m, 4H), 2.15 (s, 3H), 1.15 (t, <i>J</i> = 7.2 Hz, 6H).</p> |  |



|                                                                                                                                                                                                                                                                                                                                                                                                                                                          |
|----------------------------------------------------------------------------------------------------------------------------------------------------------------------------------------------------------------------------------------------------------------------------------------------------------------------------------------------------------------------------------------------------------------------------------------------------------|
| <p><b><math>^{13}\text{C}\{^1\text{H}\}</math> NMR (101 MHz, <math>\text{CDCl}_3</math>) <math>\delta</math> (ppm):</b> 168.8, 164.3, 145.9, 145.3, 141.3, 140.8, 133.0, 130.7, 128.9, 127.6, 127.2, 126.5, 126.4, 126.0, 117.9, 113.4, 113.1, 80.1, 63.3, 20.5, 13.8.</p> <p><b>HRMS (ESI) <math>m/z</math> calcd for <math>\text{C}_{28}\text{H}_{27}\text{N}_2\text{O}_6</math> <math>[\text{M}+\text{H}]^+</math>:</b> 487.1869; found: 487.1865</p> |
|----------------------------------------------------------------------------------------------------------------------------------------------------------------------------------------------------------------------------------------------------------------------------------------------------------------------------------------------------------------------------------------------------------------------------------------------------------|

| <b>Diethyl 2-acetoxy-2-(2-(naphthalen-2-yl)imidazo[1,2-<i>a</i>]pyridin-3-yl)malonate (4k):</b>                                                                                                                                                                                                                                                                                                                                                                                                                                                                                                                                                                                                                                                                                                                                                                                                                                           |                                                                                                                                  |
|-------------------------------------------------------------------------------------------------------------------------------------------------------------------------------------------------------------------------------------------------------------------------------------------------------------------------------------------------------------------------------------------------------------------------------------------------------------------------------------------------------------------------------------------------------------------------------------------------------------------------------------------------------------------------------------------------------------------------------------------------------------------------------------------------------------------------------------------------------------------------------------------------------------------------------------------|----------------------------------------------------------------------------------------------------------------------------------|
| <p><b>Yield:</b> 82% (75 mg).</p> <p><b>Nature:</b> white solid</p> <p><b>Mp:</b> 158-160 °C</p> <p><b>R<sub>f</sub> value</b> = 0.2 [EtOAc: Petroleum ether = 3:7 (v/v)].</p>                                                                                                                                                                                                                                                                                                                                                                                                                                                                                                                                                                                                                                                                                                                                                            | 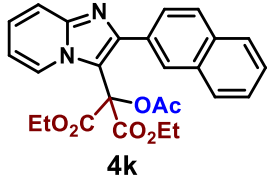 <p style="text-align: center;"><b>4k</b></p> |
| <p><b><math>^1\text{H}</math> NMR (400 MHz, <math>\text{CDCl}_3</math>) <math>\delta</math> (ppm):</b> 8.32 (d, <math>J</math> = 7.2 Hz, 1H), 8.08 (s, 1H), 7.90 (d, <math>J</math> = 8.5 Hz, 1H), 7.88 – 7.84 (m, 2H), 7.77 – 7.73 (m, 2H), 7.52 – 7.50 (m, 2H), 7.34 (ddd, <math>J</math> = 9.0, 6.8, 1.1 Hz, 1H), 6.92 (td, <math>J</math> = 6.9, 1.2 Hz, 1H), 3.79 (q, <math>J</math> = 7.1 Hz, 4H), 2.12 (s, 3H), 1.10 (t, <math>J</math> = 7.2 Hz, 6H).</p> <p><b><math>^{13}\text{C}\{^1\text{H}\}</math> NMR (101 MHz, <math>\text{CDCl}_3</math>) <math>\delta</math> (ppm):</b> 168.8, 164.30, 146.0, 145.3, 133.2, 132.7, 131.1, 129.9, 128.4, 127.8, 127.7, 127.6, 126.6, 126.5, 126.4, 126.3, 117.8, 113.8, 113.3, 80.1, 63.3, 20.5, 13.7.</p> <p><b>HRMS (ESI) <math>m/z</math> calcd for <math>\text{C}_{26}\text{H}_{25}\text{N}_2\text{O}_6</math> <math>[\text{M}+\text{H}]^+</math>:</b> 461.1713; found: 461.1714</p> |                                                                                                                                  |

| <b>Diethyl 2-acetoxy-2-(8-methyl-2-phenylimidazo[1,2-<i>a</i>]pyridin-3-yl)malonate (4l):</b>                                                                                                                                                                                                                                                                                                                                                                                                                                                                                                                                                                                                                                                                                                                                      |                                                                                                                                    |
|------------------------------------------------------------------------------------------------------------------------------------------------------------------------------------------------------------------------------------------------------------------------------------------------------------------------------------------------------------------------------------------------------------------------------------------------------------------------------------------------------------------------------------------------------------------------------------------------------------------------------------------------------------------------------------------------------------------------------------------------------------------------------------------------------------------------------------|------------------------------------------------------------------------------------------------------------------------------------|
| <p><b>Yield:</b> 78% (66 mg).</p> <p><b>Nature:</b> light yellow oil</p> <p><b>R<sub>f</sub> value</b> = 0.2 [EtOAc: Petroleum ether = 3:7 (v/v)].</p>                                                                                                                                                                                                                                                                                                                                                                                                                                                                                                                                                                                                                                                                             | 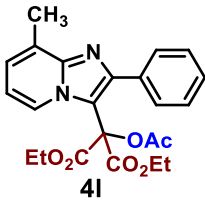 <p style="text-align: center;"><b>4l</b></p> |
| <p><b><math>^1\text{H}</math> NMR (400 MHz, <math>\text{CDCl}_3</math>) <math>\delta</math> (ppm):</b> 8.13 (d, <math>J</math> = 7.0 Hz, 1H), 7.58 (dd, <math>J</math> = 7.9, 1.6 Hz, 2H), 7.43 – 7.36 (m, 3H), 7.09 (dd, <math>J</math> = 6.9, 0.9 Hz, 1H), 6.78 (t, <math>J</math> = 7.0 Hz, 1H), 3.91 – 3.81 (m, 4H), 2.64 (s, 3H), 2.13 (s, 3H), 1.13 (t, <math>J</math> = 7.2 Hz, 6H).</p> <p><b><math>^{13}\text{C}\{^1\text{H}\}</math> NMR (101 MHz, <math>\text{CDCl}_3</math>) <math>\delta</math> (ppm):</b> 168.8, 164.3, 145.8, 145.6, 134.2, 130.5, 128.5, 127.9, 127.8, 124.8, 124.0, 113.7, 113.1, 80.2, 63.2, 20.5, 17.4, 13.8.</p> <p><b>HRMS (ESI) <math>m/z</math> calcd for <math>\text{C}_{23}\text{H}_{25}\text{N}_2\text{O}_6</math> <math>[\text{M}+\text{H}]^+</math>:</b> 425.1713; found: 425.1707</p> |                                                                                                                                    |

| <b>Diethyl 2-acetoxy-2-(7-methyl-2-phenylimidazo[1,2-<i>a</i>]pyridin-3-yl)malonate (4m):</b>                                                                                         |                                                                                                                                    |
|---------------------------------------------------------------------------------------------------------------------------------------------------------------------------------------|------------------------------------------------------------------------------------------------------------------------------------|
| <p><b>Yield:</b> 82% (70 mg).</p> <p><b>Nature:</b> light yellow solid</p> <p><b>Mp:</b> 135-137 °C</p> <p><b>R<sub>f</sub> value</b> = 0.2 [EtOAc: Petroleum ether = 3:7 (v/v)].</p> | 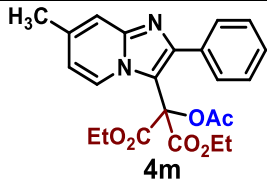 <p style="text-align: center;"><b>4m</b></p> |

**<sup>1</sup>H NMR (400 MHz, CDCl<sub>3</sub>) δ (ppm):** 8.15 (d, *J* = 7.1 Hz, 1H), 7.59 – 7.57 (m, 2H), 7.50 (s, 1H), 7.43 – 7.37 (m, 3H), 6.74 (dd, *J* = 7.2, 1.7 Hz, 1H), 3.93 – 3.82 (m, 4H), 2.43 (s, 3H), 2.13 (s, 3H), 1.12 (t, *J* = 7.1 Hz, 6H).

**<sup>13</sup>C{<sup>1</sup>H} NMR (101 MHz, CDCl<sub>3</sub>) δ (ppm):** 168.8, 164.2, 145.5, 145.4, 137.7, 133.6, 130.3, 128.7, 127.9, 125.6, 116.0, 112.9, 80.0, 63.3, 21.4, 20.5, 13.8.

**HRMS (ESI) *m/z* calcd for C<sub>23</sub>H<sub>25</sub>N<sub>2</sub>O<sub>6</sub> [M+H]<sup>+</sup>:** 425.1713; found: 425.1707

**Diethyl 2-acetoxy-2-(6-iodo-2-phenylimidazo[1,2-*a*]pyridin-3-yl)malonate (4n):**

**Yield:** 58% (62 mg).

**Nature:** white solid

**Mp:** 143-145 °C

**R<sub>f</sub> value:** 0.2 [EtOAc: Petroleum ether = 2:8 (v/v)].

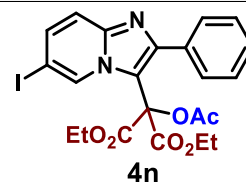

**<sup>1</sup>H NMR (400 MHz, CDCl<sub>3</sub>) δ (ppm):** 8.60 (s, 1H), 7.67 (d, *J* = 9.2 Hz, 1H), 7.61 – 7.57 (m, 3H), 7.45 – 7.43 (m, 3H), 3.94 (q, *J* = 7.1 Hz, 4H), 2.12 (s, 3H), 1.17 (t, *J* = 7.1 Hz, 6H).

**<sup>13</sup>C{<sup>1</sup>H} NMR (101 MHz, CDCl<sub>3</sub>) δ (ppm):** 168.6, 163.7, 144.4, 142.6, 135.7, 131.9, 131.3, 130.3, 129.5, 128.2, 117.9, 113.9, 79.5, 63.7, 20.4, 13.8.

**HRMS (ESI) *m/z* calcd for C<sub>22</sub>H<sub>21</sub>IN<sub>2</sub>O<sub>6</sub> [M+H]<sup>+</sup>:** 537.0523; found: 537.0517

**Diethyl 2-acetoxy-2-(6-bromo-2-phenylimidazo[1,2-*a*]pyridin-3-yl)malonate (4o):**

**Yield:** 79% (77 mg).

**Nature:** white solid

**Mp:** 96-98 °C

**R<sub>f</sub> value** = 0.2 [EtOAc: Petroleum ether = 2:8 (v/v)].

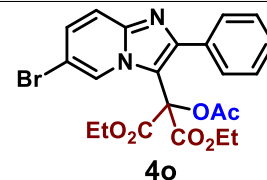

**<sup>1</sup>H NMR (400 MHz, CDCl<sub>3</sub>) δ (ppm):** 8.48 (s, 1H), 7.74 (d, *J* = 9.5 Hz, 1H), 7.61 – 7.58 (m, 2H), 7.44 (ddd, *J* = 9.5, 5.3, 1.9 Hz, 4H), 3.93 (m, 4H), 2.12 (s, 3H), 1.16 (t, *J* = 7.2 Hz, 6H).

**<sup>13</sup>C{<sup>1</sup>H} NMR (101 MHz, CDCl<sub>3</sub>) δ (ppm):** 168.7, 163.9, 146.6, 143.5, 133.2, 130.2, 129.8, 128.1, 127.9, 126.7, 118.3, 114.0, 107.9, 79.7, 63.5, 20.4, 13.8.

**HRMS (ESI) *m/z* calcd for C<sub>22</sub>H<sub>22</sub>BrN<sub>2</sub>O<sub>6</sub> [M+H]<sup>+</sup>:** 489.0661; found: 489.0656

| Diethyl 2-acetoxy-2-(6-bromo-7-methyl-2-phenylimidazo[1,2- <i>a</i> ]pyridin-3-yl)malonate (4p):                                                                                                                                                                                                                                                                                                                                                                                                                                                                                                                                                                           |                                                                                                                                  |
|----------------------------------------------------------------------------------------------------------------------------------------------------------------------------------------------------------------------------------------------------------------------------------------------------------------------------------------------------------------------------------------------------------------------------------------------------------------------------------------------------------------------------------------------------------------------------------------------------------------------------------------------------------------------------|----------------------------------------------------------------------------------------------------------------------------------|
| <p><b>Yield:</b> 59% (60 mg).</p> <p><b>Nature:</b> light yellow solid</p> <p><b>Mp:</b> 137-139 °C</p> <p><b>R<sub>f</sub> value</b> = 0.2 [EtOAc: Petroleum ether = 3:7 (v/v)].</p>                                                                                                                                                                                                                                                                                                                                                                                                                                                                                      | 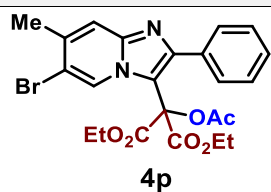 <p style="text-align: center;"><b>4p</b></p> |
| <p><b><sup>1</sup>H NMR (400 MHz, CDCl<sub>3</sub>) δ (ppm):</b> 8.15 (d, <i>J</i> = 7.1 Hz, 1H), 7.58 (dd, <i>J</i> = 7.8, 1.7 Hz, 2H), 7.50 (s, 1H), 7.41 – 7.39 (m, 2H), 6.73 (dd, <i>J</i> = 7.2, 1.7 Hz, 1H), 3.93 – 3.82 (m, 4H), 2.43 (s, 3H), 2.13 (s, 3H), 1.13 (t, <i>J</i> = 7.1 Hz, 6H).</p> <p><b><sup>13</sup>C{<sup>1</sup>H} NMR (101 MHz, CDCl<sub>3</sub>) δ (ppm):</b> 168.8, 164.3, 145.6, 145.4, 137.7, 133.7, 130.3, 128.7, 127.8, 125.6, 116.0, 115.9, 112.8, 80.0, 63.2, 21.4, 20.5, 13.8.</p> <p><b>HRMS (ESI) <i>m/z</i></b> calcd for C<sub>23</sub>H<sub>24</sub>BrN<sub>2</sub>O<sub>6</sub> [M+H]<sup>+</sup>: 503.0818; found: 503.0812</p> |                                                                                                                                  |

| Diethyl 2-acetoxy-2-(6,8-dibromo-2-phenylimidazo[1,2- <i>a</i> ]pyridin-3-yl)malonate (4q):                                                                                                                                                                                                                                                                                                                                                                                                                                                                                                                                                    |                                                                                                                                   |
|------------------------------------------------------------------------------------------------------------------------------------------------------------------------------------------------------------------------------------------------------------------------------------------------------------------------------------------------------------------------------------------------------------------------------------------------------------------------------------------------------------------------------------------------------------------------------------------------------------------------------------------------|-----------------------------------------------------------------------------------------------------------------------------------|
| <p><b>Yield:</b> 51% (58 mg).</p> <p><b>Nature:</b> yellow gummy liquid</p> <p><b>R<sub>f</sub> value</b> = 0.2 [EtOAc: Petroleum ether = 3:7 (v/v)].</p>                                                                                                                                                                                                                                                                                                                                                                                                                                                                                      | 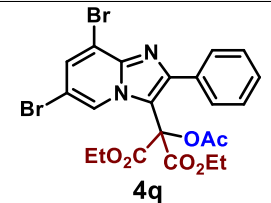 <p style="text-align: center;"><b>4q</b></p> |
| <p><b><sup>1</sup>H NMR (400 MHz, CDCl<sub>3</sub>) δ (ppm):</b> 8.43 (d, <i>J</i> = 1.5 Hz, 1H), 7.66 (d, <i>J</i> = 1.5 Hz, 1H), 7.59 – 7.56 (m, 2H), 7.40 (dd, <i>J</i> = 5.0, 2.1 Hz, 3H), 3.94 – 3.89 (m, 4H), 2.11 (s, 3H), 1.16 (t, <i>J</i> = 7.2 Hz, 6H).</p> <p><b><sup>13</sup>C{<sup>1</sup>H} NMR (101 MHz, CDCl<sub>3</sub>) δ (ppm):</b> 168.6, 163.8, 147.9, 142.1, 133.5, 131.0, 130.5, 128.9, 127.9, 125.9, 115.7, 112.4, 106.4, 79.8, 63.5, 20.4, 13.8.</p> <p><b>HRMS (ESI) <i>m/z</i></b> calcd for C<sub>22</sub>H<sub>21</sub>Br<sub>2</sub>N<sub>2</sub>O<sub>6</sub> [M+H]<sup>+</sup>: 566.9766; found: 566.9761</p> |                                                                                                                                   |

| Diethyl 2-acetoxy-2-(2-(ethoxycarbonyl)imidazo[1,2- <i>a</i> ]pyridin-3-yl)malonate (4r):                                                                                                                                                                                                                                                                                                                                                                                                                                                                                                                                                                                                    |                                                                                                                                    |
|----------------------------------------------------------------------------------------------------------------------------------------------------------------------------------------------------------------------------------------------------------------------------------------------------------------------------------------------------------------------------------------------------------------------------------------------------------------------------------------------------------------------------------------------------------------------------------------------------------------------------------------------------------------------------------------------|------------------------------------------------------------------------------------------------------------------------------------|
| <p><b>Yield:</b> 56% (45 mg).</p> <p><b>Nature:</b> light yellow oil</p> <p><b>R<sub>f</sub> value</b> = 0.3 [EtOAc: Petroleum ether = 6:4 (v/v)]</p>                                                                                                                                                                                                                                                                                                                                                                                                                                                                                                                                        | 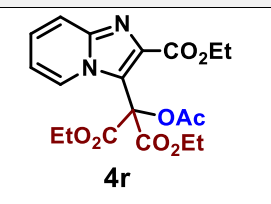 <p style="text-align: center;"><b>4r</b></p> |
| <p><b><sup>1</sup>H NMR (400 MHz, CDCl<sub>3</sub>) δ (ppm):</b> 8.18 – 8.16 (m, 1H), 7.75 – 7.72 (m, 1H), 7.32 (ddd, <i>J</i> = 9.0, 6.6, 1.1 Hz, 1H), 6.90 (td, <i>J</i> = 7.0, 1.2 Hz, 1H), 4.42 (t, <i>J</i> = 7.2 Hz, 2H), 4.38 – 4.25 (m, 4H), 2.20 (s, 3H), 1.42 (t, <i>J</i> = 7.1 Hz, 3H), 1.25 (t, <i>J</i> = 7.1 Hz, 6H).</p> <p><b><sup>13</sup>C{<sup>1</sup>H} NMR (101 MHz, CDCl<sub>3</sub>) δ (ppm):</b> 168.8, 164.3, 163.4, 145.2, 136.6, 126.8, 126.6, 119.9, 119.2, 113.9, 79.7, 63.6, 61.8, 20.8, 14.4, 13.9.</p> <p><b>HRMS (ESI) <i>m/z</i></b> calcd for C<sub>19</sub>H<sub>22</sub>N<sub>2</sub>NaO<sub>8</sub> [M+Na]<sup>+</sup>: 429.1274; found: 429.1280</p> |                                                                                                                                    |

| <b>Dimethyl 2-acetoxy-2-(2-phenylimidazo[1,2-<i>a</i>]pyridin-3-yl)malonate (4s):</b>                                                                                                                                                                                                                                                                                                                                                                                                                                                                                                                                                                            |                                              |
|------------------------------------------------------------------------------------------------------------------------------------------------------------------------------------------------------------------------------------------------------------------------------------------------------------------------------------------------------------------------------------------------------------------------------------------------------------------------------------------------------------------------------------------------------------------------------------------------------------------------------------------------------------------|----------------------------------------------|
| <p><b>Yield:</b> 92% (70 mg).</p> <p><b>Nature:</b> white solid</p> <p><b>Mp:</b> 125-127 °C</p> <p><b>R<sub>f</sub> value</b> = 0.2 [EtOAc: Petroleum ether = 4:6 (v/v)].</p>                                                                                                                                                                                                                                                                                                                                                                                                                                                                                   | <p style="text-align: center;"><b>4s</b></p> |
| <p><b><sup>1</sup>H NMR (400 MHz, CDCl<sub>3</sub>) δ (ppm):</b> 8.23 (dd, <i>J</i> = 4.6, 3.5 Hz, 1H), 7.68 (dd, <i>J</i> = 5.5, 4.5 Hz, 1H), 7.57 – 7.54 (m, 2H), 7.41 (tdd, <i>J</i> = 6.8, 4.6, 2.5 Hz, 3H), 7.32 – 7.27 (m, 1H), 6.88 (td, <i>J</i> = 6.9, 1.3 Hz, 1H), 3.47 (s, 6H), 2.15 (s, 3H).</p> <p><b><sup>13</sup>C{<sup>1</sup>H} NMR (101 MHz, CDCl<sub>3</sub>) δ (ppm):</b> 168.9, 164.8, 146.8, 145.5, 134.1, 130.2, 128.5, 127.9, 126.1, 125.8, 118.1, 113.1, 112.9, 79.9, 53.7, 20.5.</p> <p><b>HRMS (ESI) <i>m/z</i></b> calcd for C<sub>20</sub>H<sub>19</sub>N<sub>2</sub>O<sub>6</sub> [M+H]<sup>+</sup>: 383.1243; found: 383.1245</p> |                                              |

| <b>Diisopropyl 2-acetoxy-2-(2-phenylimidazo[1,2-<i>a</i>]pyridin-3-yl)malonate (4t):</b>                                                                                                                                                                                                                                                                                                                                                                                                                                                                                                                                                                                                                  |                                              |
|-----------------------------------------------------------------------------------------------------------------------------------------------------------------------------------------------------------------------------------------------------------------------------------------------------------------------------------------------------------------------------------------------------------------------------------------------------------------------------------------------------------------------------------------------------------------------------------------------------------------------------------------------------------------------------------------------------------|----------------------------------------------|
| <p><b>Yield:</b> 72% (63 mg).</p> <p><b>Nature:</b> light yellow oil</p> <p><b>R<sub>f</sub> value</b> = 0.3 [EtOAc: Petroleum ether = 4:6 (v/v)].</p>                                                                                                                                                                                                                                                                                                                                                                                                                                                                                                                                                    | <p style="text-align: center;"><b>4t</b></p> |
| <p><b><sup>1</sup>H NMR (400 MHz, CDCl<sub>3</sub>) δ (ppm):</b> 8.30 (dt, <i>J</i> = 7.1, 1.1 Hz, 1H), 7.66 – 7.61 (m, 3H), 7.42 – 7.37 (m, 3H), 7.29 – 7.24 (m, 1H), 6.84 (td, <i>J</i> = 6.9, 1.3 Hz, 1H), 4.70 (dt, <i>J</i> = 12.5, 6.3 Hz, 2H), 2.08 (s, 3H), 1.12 (d, <i>J</i> = 6.3 Hz, 6H), 1.07 (d, <i>J</i> = 6.3 Hz, 6H).</p> <p><b><sup>13</sup>C{<sup>1</sup>H} NMR (101 MHz, CDCl<sub>3</sub>) δ (ppm):</b> 168.7, 163.9, 146.5, 145.5, 134.6, 130.3, 128.4, 127.8, 126.5, 125.6, 117.9, 113.4, 112.6, 80.5, 71.8, 21.4, 21.3, 20.4.</p> <p><b>HRMS (ESI) <i>m/z</i></b> calcd for C<sub>24</sub>H<sub>27</sub>N<sub>2</sub>O<sub>6</sub> [M+H]<sup>+</sup>: 439.1869; found: 439.1859</p> |                                              |

| <b>Diethyl 2-acetoxy-2-(6-phenylimidazo[2,1-<i>b</i>]thiazol-5-yl)malonate (4u):</b>                                                                                                                                                                                                                                                                                                                                                                                                                                                                                                              |                                              |
|---------------------------------------------------------------------------------------------------------------------------------------------------------------------------------------------------------------------------------------------------------------------------------------------------------------------------------------------------------------------------------------------------------------------------------------------------------------------------------------------------------------------------------------------------------------------------------------------------|----------------------------------------------|
| <p><b>Yield:</b> 84% (70 mg).</p> <p><b>Nature:</b> light yellow oil</p> <p><b>R<sub>f</sub> value</b> = 0.2 [EtOAc: Petroleum ether = 3:7 (v/v)].</p>                                                                                                                                                                                                                                                                                                                                                                                                                                            | <p style="text-align: center;"><b>4u</b></p> |
| <p><b><sup>1</sup>H NMR (400 MHz, CDCl<sub>3</sub>) δ (ppm):</b> 7.62 (d, <i>J</i> = 4.6 Hz, 1H), 7.57 – 7.55 (m, 2H), 7.41 – 7.35 (m, 3H), 6.85 (d, <i>J</i> = 4.7 Hz, 1H), 4.02 – 3.92 (m, 4H), 2.03 (s, 3H), 1.14 (t, <i>J</i> = 7.1 Hz, 6H).</p> <p><b><sup>13</sup>C{<sup>1</sup>H} NMR (101 MHz, CDCl<sub>3</sub>) δ (ppm):</b> 169.2, 164.1, 150.7, 147.6, 133.8, 130.1, 128.5, 127.9, 121.5, 115.7, 112.0, 79.5, 63.3, 20.4, 13.7.</p> <p><b>HRMS (ESI) <i>m/z</i></b> calcd for C<sub>20</sub>H<sub>21</sub>N<sub>2</sub>O<sub>6</sub>S [M+H]<sup>+</sup>: 417.1120; found: 417.1115</p> |                                              |

| Diethyl 2-acetoxy-2-(2-phenylbenzo[d]imidazo[2,1-b]thiazol-3-yl)malonate (4v):                                                                                                                                                                                                                                                                                                                                                                                                                                                                                                                                         |                                                                                                                                  |
|------------------------------------------------------------------------------------------------------------------------------------------------------------------------------------------------------------------------------------------------------------------------------------------------------------------------------------------------------------------------------------------------------------------------------------------------------------------------------------------------------------------------------------------------------------------------------------------------------------------------|----------------------------------------------------------------------------------------------------------------------------------|
| <p><b>Yield:</b> 65% (60 mg).</p> <p><b>Nature:</b> light yellow oil</p> <p><b>R<sub>f</sub> value</b> = 0.2 [EtOAc: Petroleum ether = 2:8 (v/v)].</p>                                                                                                                                                                                                                                                                                                                                                                                                                                                                 | 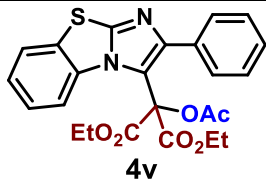 <p style="text-align: center;"><b>4v</b></p> |
| <p><b><sup>1</sup>H NMR (400 MHz, CDCl<sub>3</sub>) δ (ppm):</b> 8.02 (d, <i>J</i> = 8.1 Hz, 1H), 7.72 (dd, <i>J</i> = 7.9, 1.1 Hz, 1H), 7.64 – 7.61 (m, 2H), 7.47 – 7.35 (m, 5H), 3.84 (bs, 4H), 2.16 (s, 3H), 1.15 (t, <i>J</i> = 7.2 Hz, 6H).</p> <p><b><sup>13</sup>C{<sup>1</sup>H} NMR (101 MHz, CDCl<sub>3</sub>) δ (ppm):</b> 168.1, 164.7, 149.3, 147.4, 133.7, 133.5, 130.3, 128.7, 127.8, 126.3, 125.2, 124.3, 118.7, 116.2, 80.4, 63.4, 21.1, 13.7.</p> <p><b>HRMS (ESI) <i>m/z</i></b> calcd for C<sub>24</sub>H<sub>23</sub>N<sub>2</sub>O<sub>6</sub>S [M+H]<sup>+</sup>: 467.1277; found: 467.1271</p> |                                                                                                                                  |

| Diethyl 2-acetoxy-2-(2-phenylimidazo[1,2-a]pyrimidin-3-yl)malonate (4w):                                                                                                                                                                                                                                                                                                                                                                                                                                                                                                                                                                                        |                                                                                                                                   |
|-----------------------------------------------------------------------------------------------------------------------------------------------------------------------------------------------------------------------------------------------------------------------------------------------------------------------------------------------------------------------------------------------------------------------------------------------------------------------------------------------------------------------------------------------------------------------------------------------------------------------------------------------------------------|-----------------------------------------------------------------------------------------------------------------------------------|
| <p><b>Yield:</b> 85% (70 mg).</p> <p><b>Nature:</b> white solid</p> <p><b>Mp:</b> 119-121 °C</p> <p><b>R<sub>f</sub> value</b> = 0.3 [EtOAc: Petroleum ether = 6:4 (v/v)].</p>                                                                                                                                                                                                                                                                                                                                                                                                                                                                                  | 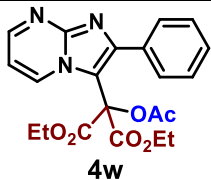 <p style="text-align: center;"><b>4w</b></p> |
| <p><b><sup>1</sup>H NMR (400 MHz, CDCl<sub>3</sub>) δ (ppm):</b> 8.66 (dt, <i>J</i> = 4.8, 1.9 Hz, 2H), 7.64 (dd, <i>J</i> = 7.5, 1.9 Hz, 2H), 7.42 (dd, <i>J</i> = 4.9, 2.5 Hz, 3H), 6.96 (dd, <i>J</i> = 7.0, 4.1 Hz, 1H), 3.94 (q, <i>J</i> = 7.2 Hz, 4H), 2.09 (s, 3H), 1.14 (t, <i>J</i> = 7.1 Hz, 6H).</p> <p><b><sup>13</sup>C{<sup>1</sup>H} NMR (101 MHz, CDCl<sub>3</sub>) δ (ppm):</b> 168.8, 163.9, 151.2, 148.1, 134.9, 133.4, 130.4, 128.9, 127.9, 112.1, 109.0, 79.7, 63.5, 20.4, 13.8.</p> <p><b>HRMS (ESI) <i>m/z</i></b> calcd for C<sub>21</sub>H<sub>21</sub>N<sub>3</sub>NaO<sub>6</sub> [M+Na]<sup>+</sup>: 434.1328; found: 434.1319</p> |                                                                                                                                   |

| Ethyl 2-acetoxy-2-cyano-2-(2-phenylimidazo[1,2-a]pyridin-3-yl)acetate (4x):                                                                                                                                                                                                                                                                                                                                                                                                                                                                                                                                                                                                                                                   |                                                                                                                                    |
|-------------------------------------------------------------------------------------------------------------------------------------------------------------------------------------------------------------------------------------------------------------------------------------------------------------------------------------------------------------------------------------------------------------------------------------------------------------------------------------------------------------------------------------------------------------------------------------------------------------------------------------------------------------------------------------------------------------------------------|------------------------------------------------------------------------------------------------------------------------------------|
| <p><b>Yield:</b> 48% (35 mg).</p> <p><b>Nature:</b> yellow gummy liquid</p> <p><b>R<sub>f</sub> value</b> = 0.2 [EtOAc: Petroleum ether = 3:7 (v/v)].</p>                                                                                                                                                                                                                                                                                                                                                                                                                                                                                                                                                                     | 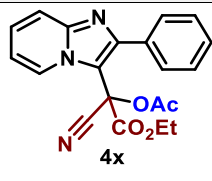 <p style="text-align: center;"><b>4x</b></p> |
| <p><b><sup>1</sup>H NMR (400 MHz, CDCl<sub>3</sub>) δ (ppm):</b> 8.53 (dd, <i>J</i> = 6.1, 0.9 Hz, 1H), 7.73 (d, <i>J</i> = 9.1 Hz, 1H), 7.55 – 7.53 (m, 2H), 7.44 – 7.39 (m, 4H), 7.03 (td, <i>J</i> = 7.0, 1.1 Hz, 1H), 3.98 (dq, <i>J</i> = 10.6, 7.1 Hz, 1H), 3.75 (dq, <i>J</i> = 10.7, 7.1 Hz, 1H), 2.15 (s, 3H), 1.21 (t, <i>J</i> = 7.1 Hz, 3H).</p> <p><b><sup>13</sup>C{<sup>1</sup>H} NMR (101 MHz, CDCl<sub>3</sub>) δ (ppm):</b> 168.5, 161.1, 147.8, 146.1, 133.4, 130.4, 128.9, 127.7, 126.7, 125.9, 118.2, 113.6, 112.5, 108.3, 83.3, 64.5, 20.1, 13.6.</p> <p><b>HRMS (ESI) <i>m/z</i></b> calcd for C<sub>20</sub>H<sub>18</sub>N<sub>3</sub>O<sub>4</sub> [M+H]<sup>+</sup>: 364.1297; found: 364.1293</p> |                                                                                                                                    |

| Ethyl 2-acetoxy-3-oxo-2-(2-phenylimidazo[1,2- <i>a</i> ]pyridin-3-yl)butanoate ( <b>4y</b> ):                                                                                                                                                                                                                                                                                                                                                                                                                                                                                                                                                                                                                                                                                                        |  |
|------------------------------------------------------------------------------------------------------------------------------------------------------------------------------------------------------------------------------------------------------------------------------------------------------------------------------------------------------------------------------------------------------------------------------------------------------------------------------------------------------------------------------------------------------------------------------------------------------------------------------------------------------------------------------------------------------------------------------------------------------------------------------------------------------|--|
| <b>Yield:</b> 83% (63 mg).<br><b>Nature:</b> white solid<br><b>Mp:</b> 114-116 °C<br><b>R<sub>f</sub> value</b> = 0.3 [EtOAc: Petroleum ether = 4:6 (v/v)]                                                                                                                                                                                                                                                                                                                                                                                                                                                                                                                                                                                                                                           |  |
| <sup>1</sup> H NMR (400 MHz, CDCl <sub>3</sub> ) δ (ppm): 8.13 (d, <i>J</i> = 7.0 Hz, 1H), 7.66 (dd, <i>J</i> = 5.6, 4.5 Hz, 1H), 7.52 – 7.49 (m, 2H), 7.43 (dd, <i>J</i> = 5.1, 2.2 Hz, 3H), 7.32 (ddd, <i>J</i> = 8.8, 6.8, 1.1 Hz, 1H), 6.88 (td, <i>J</i> = 6.9, 1.2 Hz, 1H), 3.65 (dd, <i>J</i> = 10.7, 7.2 Hz, 1H), 3.39 (dd, <i>J</i> = 10.7, 7.2 Hz, 1H), 2.34 (s, 3H), 2.17 (s, 3H), 1.02 (t, <i>J</i> = 7.1 Hz, 3H).<br><sup>13</sup> C{ <sup>1</sup> H} NMR (101 MHz, CDCl <sub>3</sub> ) δ (ppm): 196.3, 169.1, 164.2, 147.2, 145.8, 134.2, 130.3, 128.8, 127.9, 126.6, 126.3, 117.9, 113.3, 111.6, 85.2, 62.6, 27.3, 20.5, 13.5.<br><b>HRMS</b> (ESI) <i>m/z</i> calcd for C <sub>21</sub> H <sub>21</sub> N <sub>2</sub> O <sub>5</sub> [M+H] <sup>+</sup> : 381.1450; found: 381.1452 |  |

| Diethyl 2-(2-phenylimidazo[1,2- <i>a</i> ]pyridin-3-yl)malonate ( <b>5</b> ): <sup>6</sup>                                                                                                                                                                                                                                                                                                                                                                                                                                                    |  |
|-----------------------------------------------------------------------------------------------------------------------------------------------------------------------------------------------------------------------------------------------------------------------------------------------------------------------------------------------------------------------------------------------------------------------------------------------------------------------------------------------------------------------------------------------|--|
| <b>Yield:</b> 66% (46 mg).<br><b>Nature:</b> yellow oil<br><b>R<sub>f</sub> value</b> = 0.3 [EtOAc: Petroleum ether = 3:7 (v/v)].                                                                                                                                                                                                                                                                                                                                                                                                             |  |
| <sup>1</sup> H NMR (400 MHz, CDCl <sub>3</sub> ) δ (ppm): 8.35 – 8.33 (m, 1H), 7.76 (dd, <i>J</i> = 8.3, 1.3 Hz, 2H), 7.68 – 7.65 (m, 1H), 7.51 – 7.47 (m, 2H), 7.41 (dt, <i>J</i> = 9.4, 4.4 Hz, 1H), 7.25 – 7.22 (m, 1H), 6.82 (td, <i>J</i> = 6.9, 1.2 Hz, 1H), 5.40 (s, 1H), 4.23 (qd, <i>J</i> = 7.2, 3.1 Hz, 4H), 1.24 (t, <i>J</i> = 7.2 Hz, 6H).<br><sup>13</sup> C{ <sup>1</sup> H} NMR (101 MHz, CDCl <sub>3</sub> ) δ (ppm): 166.8, 146.4, 145.9, 133.9, 129.2, 128.8, 128.3, 126.3, 125.3, 117.7, 112.1, 111.9, 62.5, 49.3, 14.1. |  |

## 5. Mechanistic studies and control experiments:

**5.1. Radical trapping with TEMPO:** An oven-dried culture tube equipped with a magnetic stirring bar was charged with 2-phenylimidazo[1,2-*a*]pyridine (**1a**, 39 mg, 0.2 mmol, 1.0 equiv), diethyl bromomalonate (**2a**, 96 mg, 0.4 mmol, 2.0 equiv), Zn(OAc)<sub>2</sub> (132 mg, 0.6 mmol, 3.0 equiv), photocatalyst **PTH** (5 mol %) in dry 1,2-DCE (2 mL) followed by the addition of TEMPO (94 mg, 0.6 mmol, 3.0 equiv). The resulting reaction mixture was stirred at room temperature under an open atmosphere using 390 nm violet LED for 10 h. A fan cooling was also included to maintain the reaction at room temperature. After the reaction, it was found that the formation of acetoxymalonylated product **4a** was suppressed significantly, and the TEMPO-DEM adduct **7** and TEMPO-OAc adduct **8** were detected by HRMS analysis of the crude reaction mixture, indicating the involvement of a malonyl radical and acetyl radical during the reaction.

<sup>6</sup> Huang M.; Wang L.; Yang X.; Kim J. K.; Gong M.; Zhang J.; Li Y.; Wu Y. *Tetrahedron*. **2022**, *126*, 132988.

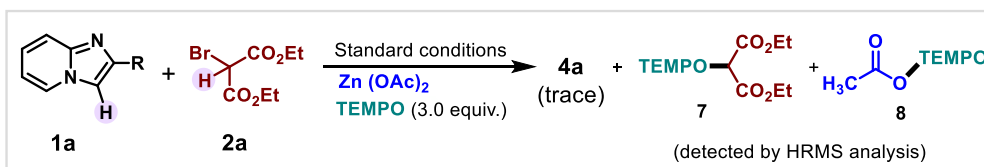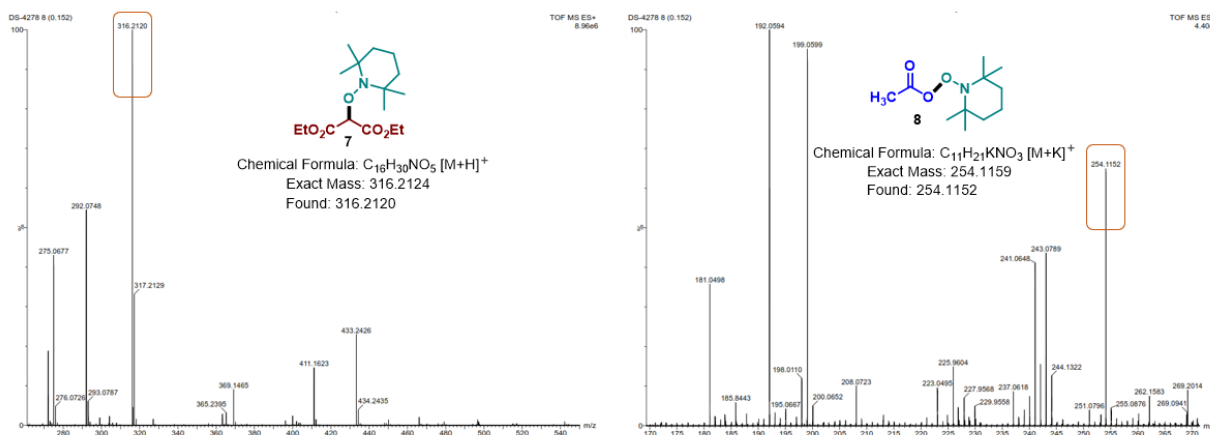

**Figure S1:** HRMS spectrum of the crude reaction mixture (compounds **7** and **8**).

**5.2. Radical trapping with alkene:** An oven-dried culture tube equipped with a magnetic stirring bar was charged with 2-phenylimidazo[1,2-*a*]pyridine (**1a**, 39 mg, 0.2 mmol, 1.0 equiv), diethyl bromomalonate (**2a**, 96 mg, 0.4 mmol, 2.0 equiv), 5-hexene-1-ol (47  $\mu\text{L}$ , 0.4 mmol, 2.0 equiv), photocatalyst **PTH** (5 mol %) in dry 1,2-DCE (2 mL). The resulting reaction mixture was stirred at room temperature under an open atmosphere using 390 nm violet LED for 15 h. A fan cooling was also included to maintain the reaction at room temperature. After the reaction, ATRA product **9** was isolated via column chromatography. This further confirms the involvement of a malonyl radical during the reaction.

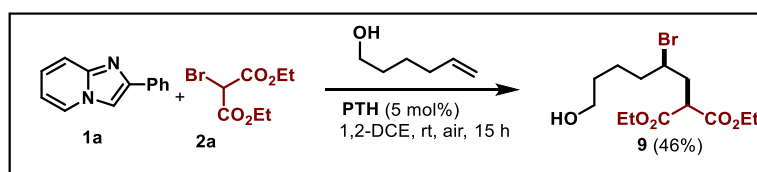

**Diethyl 2-(2-bromo-6-hydroxyhexyl)malonate (9):<sup>7</sup>**

**Yield:** 46% (31 mg).

**Nature:** colourless oil.

**R<sub>f</sub> value** = 0.3 [EtOAc: Petroleum ether = 3:7 (v/v)].

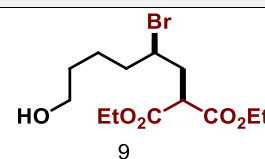

<sup>7</sup> Nguyen, J. D.; Tucker, J. W.; Konieczynska, M. D.; Stephenson, C. R. J. *J. Am. Chem. Soc.* **2011**, *133*, 4160–4163.

**<sup>1</sup>H NMR (400 MHz, CDCl<sub>3</sub>) δ (ppm):** 4.25 – 4.14 (m, 4H), 4.04 – 3.94 (m, 1H), 3.76 (dd, *J* = 10.2, 4.2 Hz, 1H), 3.63 (t, *J* = 6.1 Hz, 2H), 2.45 (ddd, *J* = 14.7, 10.2, 3.1 Hz, 1H), 2.23 (ddd, *J* = 14.8, 10.6, 4.2 Hz, 1H), 1.90 – 1.84 (m, 2H), 1.66 – 1.47 (m, 4H), 1.26 (td, *J* = 7.1, 3.8 Hz, 6H).

**<sup>13</sup>C{<sup>1</sup>H} NMR (101 MHz, CDCl<sub>3</sub>) δ (ppm):** 169.1, 168.9, 62.6, 61.8, 61.7, 54.8, 50.7, 39.2, 37.9, 32.0, 23.8, 14.15, 14.11.

### 5.3. Reaction of 2-phenylimidazo[1,2-*a*]pyridine and bromomalonate without Zn(OAc)<sub>2</sub>:

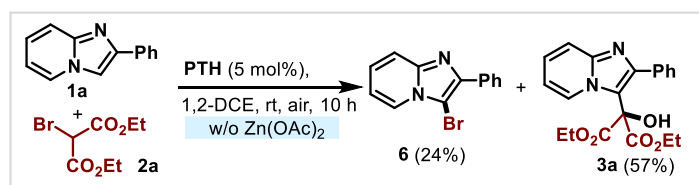

An oven-dried culture tube equipped with a magnetic stirring bar was charged with 2-phenylimidazo[1,2-*a*]pyridine (**1a**, 39 mg, 0.2 mmol, 1.0 equiv), diethyl bromomalonate (**2a**, 96 mg, 0.4 mmol, 2.0 equiv) and photocatalyst **PTH** (5 mol %) in dry 1,2-DCE (2 mL). The resulting reaction mixture was stirred at room temperature under open atmosphere in using 390 nm violet LED for 10 h. A fan cooling was also included to maintain the reaction at room temperature. The completion of the reaction was confirmed by TLC. Then, the crude reaction mixture was poured into H<sub>2</sub>O (10 mL) and extracted with CH<sub>2</sub>Cl<sub>2</sub> (3 × 6 mL). The combined organic layer was washed with brine solution and dried using oven dried anhydrous Na<sub>2</sub>SO<sub>4</sub>. Then, the mixture was concentrated in a rotary evaporator under reduced pressure and the crude residue was purified by column chromatography to obtain the products **3a** and **6**.

#### Diethyl 2-hydroxy-2-(2-phenylimidazo[1,2-*a*]pyridin-3-yl)malonate (**3a**):<sup>6</sup>

**Yield:** 57% (42 mg).

**Nature:** white solid

**Mpt:** 147-149 °C

**R<sub>f</sub> value** = 0.2 [EtOAc: Petroleum ether = 4:6 (v/v)].

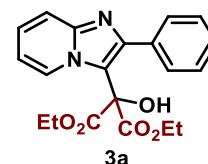

**<sup>1</sup>H NMR (400 MHz, CDCl<sub>3</sub>) δ (ppm):** 8.08 – 8.06 (m, 1H), 7.67 – 7.65 (m, 1H), 7.53 (dd, *J* = 8.2, 1.5 Hz, 2H), 7.41 – 7.34 (m, 3H), 7.25 (q, *J* = 5.7 Hz, 1H), 6.81 (td, *J* = 6.9, 1.2 Hz, 1H), 4.68 (s, 1H), 3.94 (dq, *J* = 10.6, 7.0 Hz, 2H), 3.67 (dq, *J* = 10.6, 7.1 Hz, 2H), 1.02 (t, *J* = 7.1 Hz, 6H).

**<sup>13</sup>C{<sup>1</sup>H} NMR (101 MHz, CDCl<sub>3</sub>) δ (ppm):** 168.7, 146.2, 145.2, 135.0, 129.8, 128.3, 128.1, 125.7, 125.5, 117.9, 115.6, 112.6, 76.9, 63.5, 13.7.



| <b>3-Bromo-2-phenylimidazo[1,2-<i>a</i>]pyridine (6)<sup>8</sup>:</b>                                                                                                                                                                                                                                                                                                                                      |                                                                                     |
|------------------------------------------------------------------------------------------------------------------------------------------------------------------------------------------------------------------------------------------------------------------------------------------------------------------------------------------------------------------------------------------------------------|-------------------------------------------------------------------------------------|
| <b>Yield:</b> 24% (13 mg).<br><b>Nature:</b> yellow liquid<br><b>R<sub>f</sub> value</b> = 0.6 [EtOAc: Petroleum ether = 4:6 (v/v)].                                                                                                                                                                                                                                                                       | 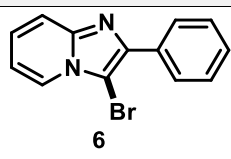 |
| <sup>1</sup> H NMR (400 MHz, CDCl <sub>3</sub> ) δ (ppm): 8.16 – 8.12 (m, 3H), 7.63 (dd, <i>J</i> = 10.1, 0.9 Hz, 1H), 7.49 (dd, <i>J</i> = 10.4, 4.6 Hz, 2H), 7.41 – 7.37 (m, 1H), 7.24 – 7.22 (m, 1H), 6.91 (td, <i>J</i> = 6.8, 0.9 Hz, 1H).<br><sup>13</sup> C{ <sup>1</sup> H} NMR (101 MHz, CDCl <sub>3</sub> ) δ (ppm): 145.5, 142.7, 132.9, 128.6, 128.4, 127.9, 125.2, 124.0, 117.7, 113.1, 91.8. |                                                                                     |

#### 5.4. Competitive acylation reaction with benzoic acid

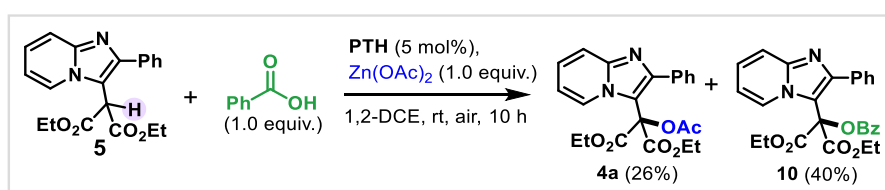

An oven-dried culture tube equipped with a magnetic stirring bar was charged with diethyl 2-(2-phenylimidazo[1,2-*a*]pyridin-3-yl)malonate (**5**, 70 mg, 0.2 mmol, 1.0 equiv), benzoic acid (24 mg, 0.2 mmol, 1.0 equiv), Zn(OAc)<sub>2</sub> (44 mg, 0.2 mmol, 1.0 equiv) and photocatalyst **PTH** (5 mol %). The resulting reaction mixture was stirred at rt under open atmosphere condition using 390 nm violet LED for 10 h. The completion of the reaction was confirmed by TLC. Then, the crude reaction mixture was poured into H<sub>2</sub>O (10 mL) and extracted with CH<sub>2</sub>Cl<sub>2</sub> (3 × 6 mL). The combined organic layer was washed with brine solution and dried using oven dried anhydrous Na<sub>2</sub>SO<sub>4</sub>. Then, the mixture was concentrated in a rotary evaporator under reduced pressure and the crude residue was purified by column chromatography to obtain the desired products **4a** and **10**.

| <b>Diethyl 2-(benzoyloxy)-2-(2-phenylimidazo[1,2-<i>a</i>]pyridin-3-yl)malonate (10):</b>                                                                                                                                                                                                                                                                                                                                                                                                                                                                                                                                                                                                                                                                                            |                                                                                       |
|--------------------------------------------------------------------------------------------------------------------------------------------------------------------------------------------------------------------------------------------------------------------------------------------------------------------------------------------------------------------------------------------------------------------------------------------------------------------------------------------------------------------------------------------------------------------------------------------------------------------------------------------------------------------------------------------------------------------------------------------------------------------------------------|---------------------------------------------------------------------------------------|
| <b>Yield:</b> 40% (38 mg).<br><b>Nature:</b> yellow gummy liquid<br><b>R<sub>f</sub> value</b> = 0.3 [EtOAc: Petroleum ether = 4:6 (v/v)].                                                                                                                                                                                                                                                                                                                                                                                                                                                                                                                                                                                                                                           | 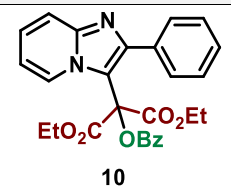 |
| <sup>1</sup> H NMR (400 MHz, CDCl <sub>3</sub> ) δ (ppm): 8.43 (dd, <i>J</i> = 8.1, 0.9 Hz, 1H), 7.92 (dd, <i>J</i> = 8.4, 1.1 Hz, 2H), 7.73 (d, <i>J</i> = 8.9 Hz, 1H), 7.64 (dd, <i>J</i> = 7.9, 1.6 Hz, 2H), 7.60 – 7.56 (m, 1H), 7.43 – 7.39 (m, 5H), 7.33 (ddd, <i>J</i> = 9.1, 6.8, 1.1 Hz, 1H), 6.90 (tt, <i>J</i> = 12.9, 6.5 Hz, 1H), 3.98 – 3.86 (m, 4H), 1.13 (t, <i>J</i> = 7.1 Hz, 6H).<br><sup>13</sup> C{ <sup>1</sup> H} NMR (101 MHz, CDCl <sub>3</sub> ) δ (ppm): 164.4, 164.3, 146.8, 145.5, 134.3, 133.9, 130.3, 130.2, 128.9, 128.7, 128.6, 127.9, 126.4, 125.8, 118.2, 113.7, 113.1, 80.4, 63.3, 13.8.<br><b>HRMS</b> (ESI) <i>m/z</i> calcd for C <sub>27</sub> H <sub>25</sub> N <sub>2</sub> O <sub>6</sub> [M+H] <sup>+</sup> : 473.1713; found: 473.1711. |                                                                                       |

<sup>8</sup> Semwal R.; Ravi C.; Kumar R.; Meena R.; Adimurthy S. *J. Org. Chem.* **2018**, *84*, 792.

### 5.5. Stern–Volmer fluorescence quenching experiments

All emission spectra were recorded using a Shimadzu RF-6000 Spectrophotometer (model no.-A40246002251SA). Photocatalyst **PTH** and different concentrations of added quenchers were prepared in dry and degassed acetonitrile in quartz cuvettes. For the quenching experiments, the concentration of **PTH** was  $4.0 \times 10^{-5}$  M. The solutions were excited at 320 nm, and the emission intensity was measured at 445 nm for **PTH**. Plots were derived according to the Stern–Volmer equation, and  $K_{sv}$  was calculated.

$$\text{Stern–Volmer equation: } I_0/I = 1 + K_{sv}[Q]$$

Where  $I_0$  is the luminescence intensity of the photocatalyst in the absence of a quencher,  $I$  is the intensity of the photocatalyst in the presence of quenchers,  $[Q]$  is the concentration of added quencher, and  $K_{sv}$  is the Stern–Volmer quenching constant. All emission spectra were recorded after each addition of the quencher. The obtained spectra (Figure S2) show that diethyl bromomalonate (**2a**) is the prominent quencher here and suggested a mechanism started with radical engagement of **2a**.

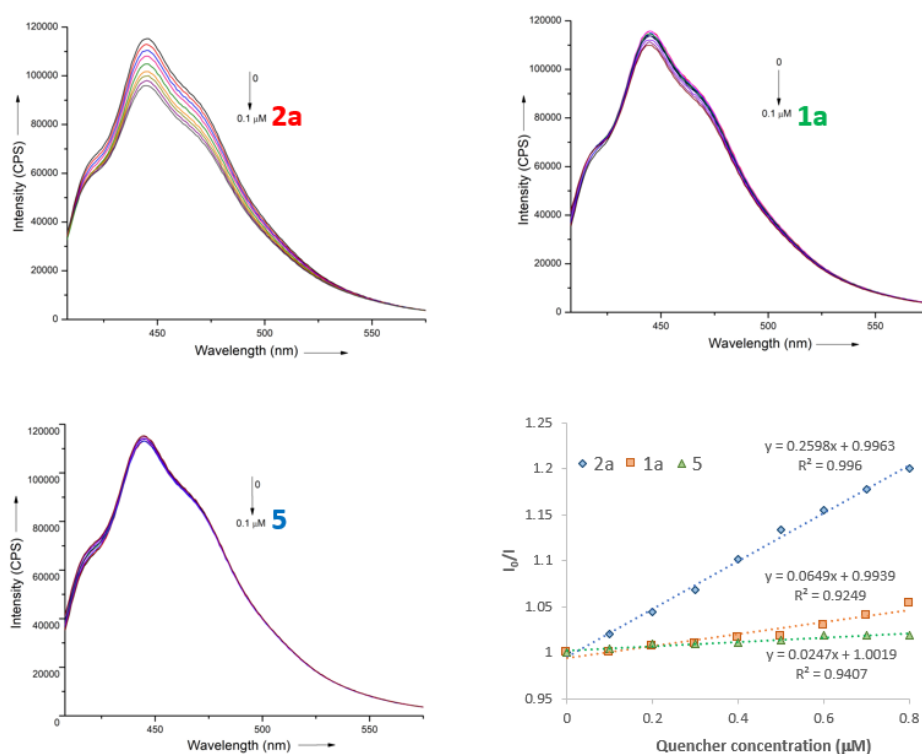

**Figure S2:** The fluorescence emission spectra of PTH with different concentrations of added quenchers diethyl bromo malonates (**2a**), 2-phenylimidazo[1,2-*a*]pyridine (**1a**), and diethyl 2-(2-phenylimidazo[1,2-*a*]pyridin-3-yl)malonate (**5**).

## 5.6. Analysis of the aqueous extract of the crude reaction mixture

After completion of the reaction, the crude reaction mixture was extracted with  $\text{CH}_2\text{Cl}_2$  ( $3 \times 6$  mL) and water (10 mL). The water extract was evaporated on a rotary evaporator under reduced pressure and then dried by a high vacuum pump with temperature to get an off-white solid. The solid material is highly hygroscopic and liquified upon exposure to air. HRMS spectra of the material clearly indicated that it is nothing but the zinc bromide ( $\text{ZnBr}_2$ ). In addition, the aqueous part of crude reaction mixture has vinegar-like smell, which indicates in situ generation of acetic acid, which was further confirmed by GC-MS analysis.

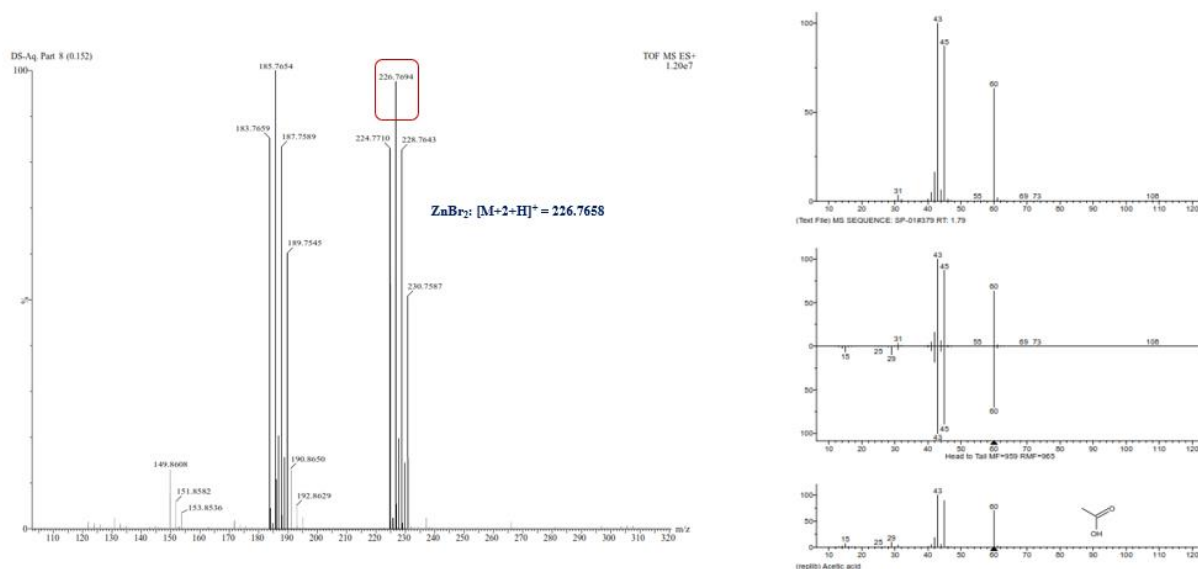

Figure S3: HRMS and GC-MS spectra of the aqueous extract of the crude reaction mixture.

## 5.7. NMR experiment

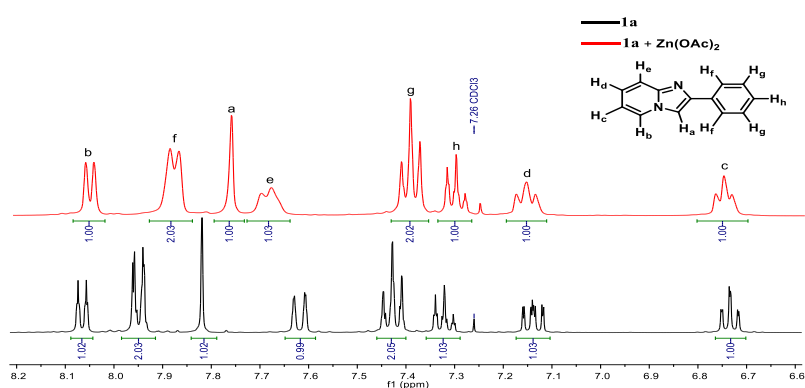

Figure S4:  $^1\text{H}$  NMR spectra were taken in  $\text{CDCl}_3$ : 2-phenylimidazo[1,2-*a*]pyridine (**1a**; black); after interaction of **1a** with  $\text{Zn}(\text{OAc})_2$  (red), in the absence of **PTH**.  $\delta_{\text{H}} = 7.26$  ppm represents the residual solvent signal in  $\text{CDCl}_3$ .

**General procedure for the NMR experiment:** To check if Zn(OAc)<sub>2</sub> interacts with the 2-phenylimidazo[1,2-*a*]pyridine moiety individual <sup>1</sup>H NMR spectra of 2-phenylimidazo[1,2-*a*]pyridine and 2-phenylimidazo[1,2-*a*]pyridine with Zn(OAc)<sub>2</sub> [1:1] in CDCl<sub>3</sub> were recorded. Observations from this study revealed the shifting of peaks in the aromatic region, more specifically the signal for the C-H<sub>c</sub> proton was shifted towards the downfield region as clearly indicated above in Figure S4. This is possibly due to coordination type interaction of Zn with the N-atom at C-1 position, which facilitates the reaction process to uplift the overall reaction yield via preactivation of the IP unit.

#### 6. X-ray crystal data with ORTEP plot for compound 4d.

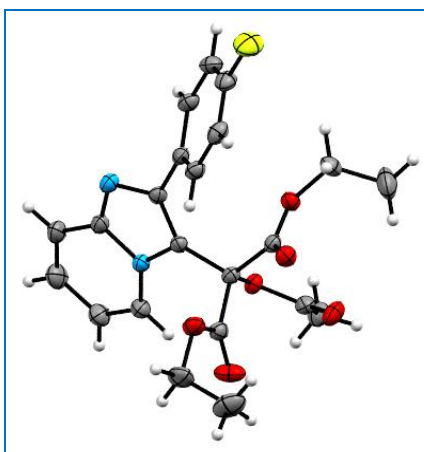

**Figure S5:** ORTEP plot of compound **4d** with 30% ellipsoid probability.

**Crystal data for 4d:** X-ray single crystal data were collected using MoK $\alpha$  ( $\lambda = 0.71073 \text{ \AA}$ ) radiation on a Rigaku SuperNova diffractometer equipped with an Eos S2 detector. Structure solution/refinement were carried out using Shelx-2013. The structure was solved by direct method and refined in a routine manner. Nonhydrogen atoms were treated anisotropically. All hydrogen atoms were geometrically fixed. CCDC (CCDC No: 2221790) contains the supplementary crystallographic data of **4d**. These data can be obtained free of charge via [www.ccdc.cam.ac.uk/conts/retrieving.html](http://www.ccdc.cam.ac.uk/conts/retrieving.html) (or from the Cambridge Crystallographic Data Centre, 12 Union Road, Cambridge CB21EZ, UK; fax: (+44) 1223-336-033; or [deposit@ccdc.cam.ac.uk](mailto:deposit@ccdc.cam.ac.uk)).

**Table S2 Crystal data and structure refinement for compound 4d.**

|                     |                                                                |
|---------------------|----------------------------------------------------------------|
| Identification code | CCDC 2221790                                                   |
| Empirical formula   | C <sub>22</sub> H <sub>21</sub> FN <sub>2</sub> O <sub>6</sub> |
| Formula weight      | 428.41                                                         |
| Temperature/K       | 293(2)                                                         |
| Crystal system      | monoclinic                                                     |
| Space group         | P 21/n                                                         |

|                                  |                                      |
|----------------------------------|--------------------------------------|
| a/Å                              | 12.7400(7)                           |
| b/Å                              | 12.9269(8)                           |
| c/Å                              | 12.9616(7)                           |
| $\alpha$ /°                      | 90                                   |
| $\beta$ /°                       | 102.603(5)                           |
| $\gamma$ /°                      | 90                                   |
| Volume/Å <sup>3</sup>            | 2083.2(2)                            |
| Z                                | 4                                    |
| $\rho_{\text{calc}}/\text{cm}^3$ | 1.366                                |
| $\mu/\text{mm}^{-1}$             | 0.106                                |
| F(000)                           | 896                                  |
| Radiation                        | MoK $\alpha$ ( $\lambda = 0.71073$ ) |
| Theta (min)                      | 2.031                                |
| Theta (max)                      | 26.999                               |
| h, k, l max                      | 16, 16, 16                           |
| R (reflections)                  | 0.0462 (2968)                        |
| wR2 (reflections)                | 0.1070 (4467)                        |

## 7. NMR spectra

$^1\text{H}$  NMR of **3a** (400 MHz,  $\text{CDCl}_3$ ):

SM-SP-1649 1H

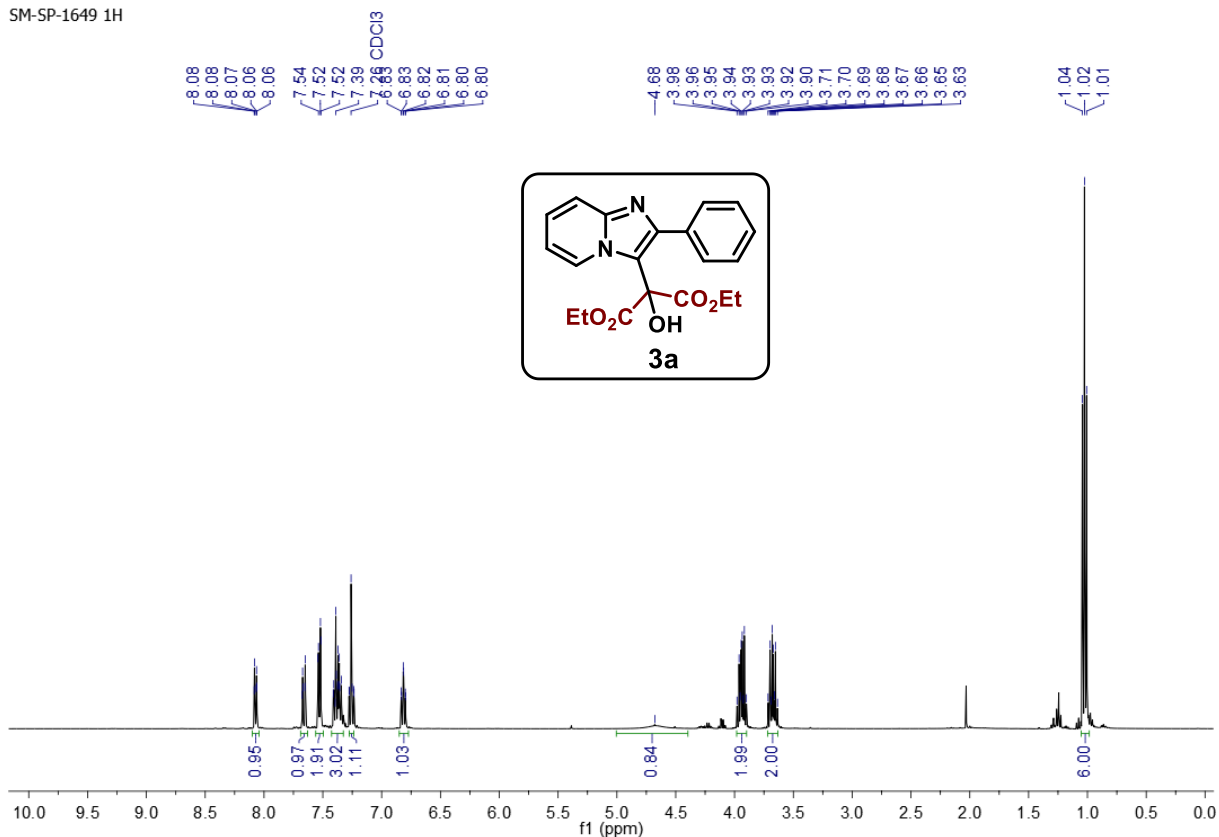

$^{13}\text{C}\{^1\text{H}\}$  NMR of **3a** (101 MHz,  $\text{CDCl}_3$ ):

SM-SP-1649 13C

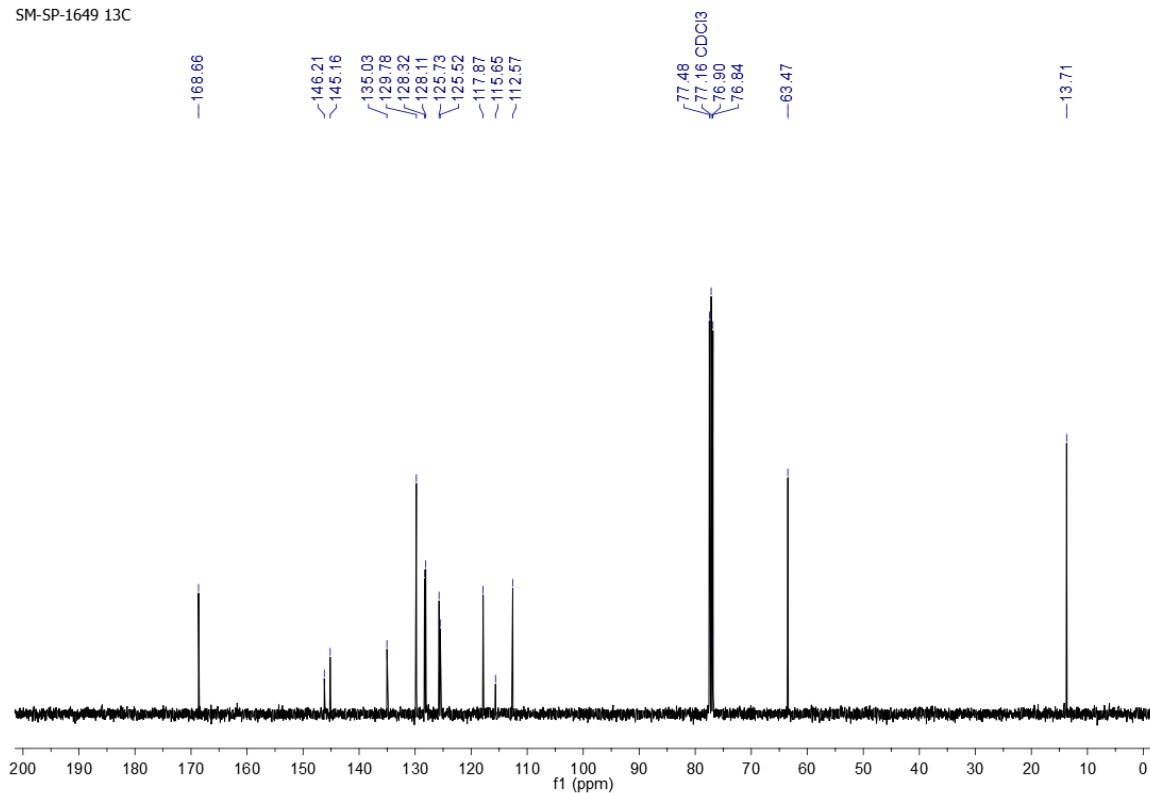

$^1\text{H}$  NMR of **4a** (400 MHz,  $\text{CDCl}_3$ ):

SM-DS-4196 1H

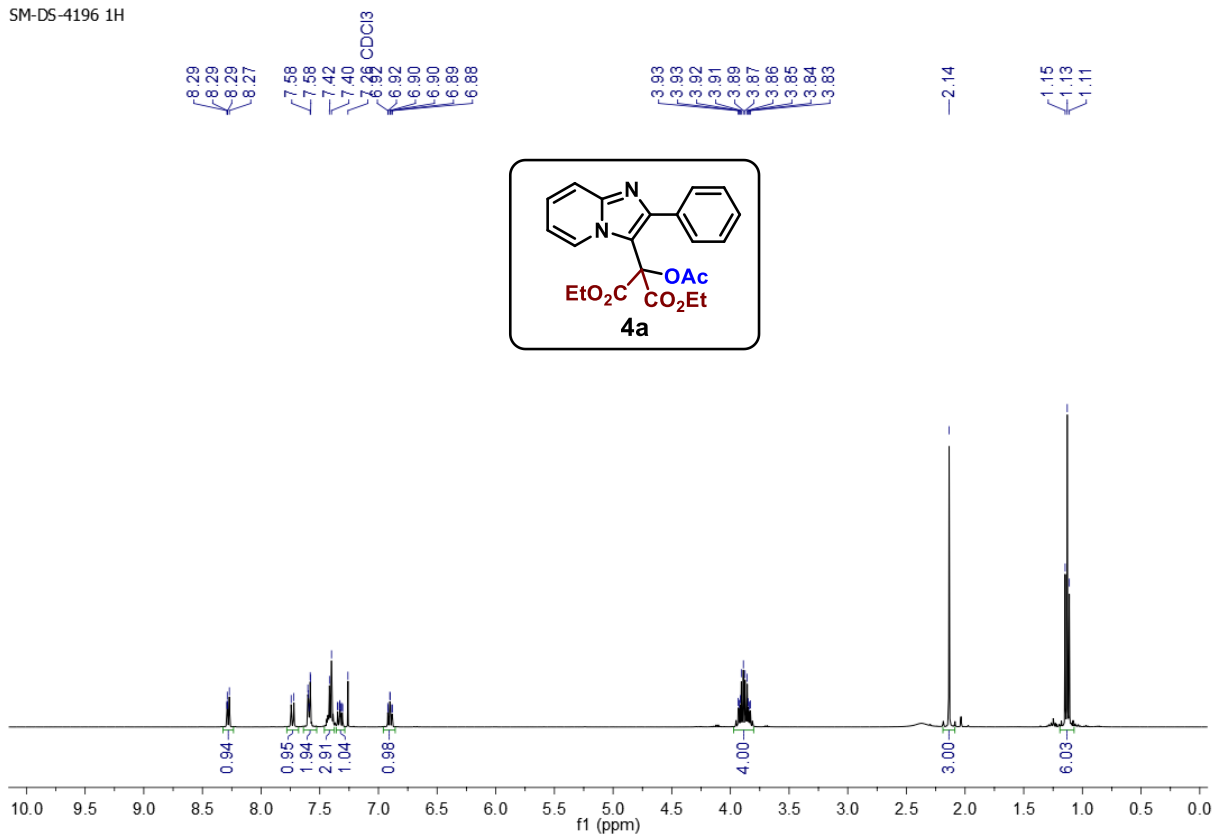

$^{13}\text{C}\{^1\text{H}\}$  NMR of **4a** (101 MHz,  $\text{CDCl}_3$ ):

SM-DS-4196 13C

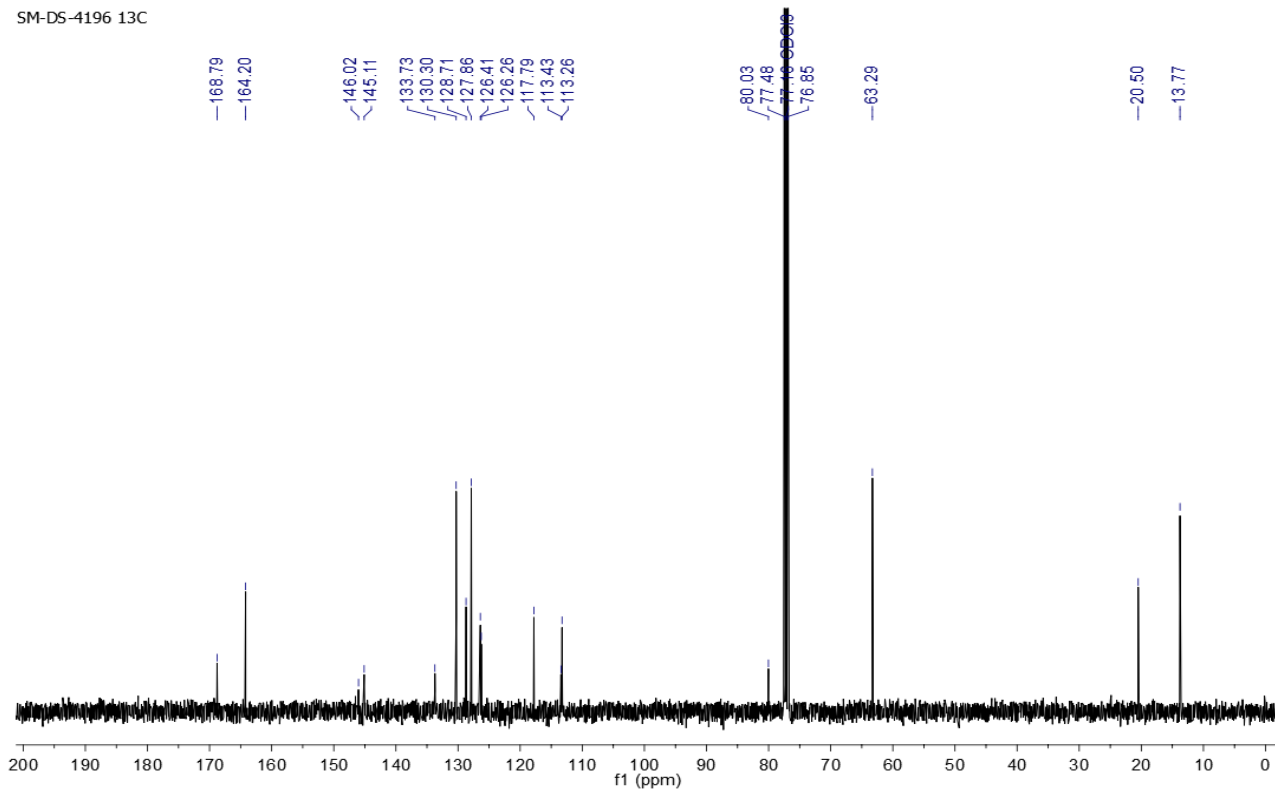

$^1\text{H}$  NMR of **4b** (400 MHz,  $\text{CDCl}_3$ ):

SM-D5-4191-R 1H

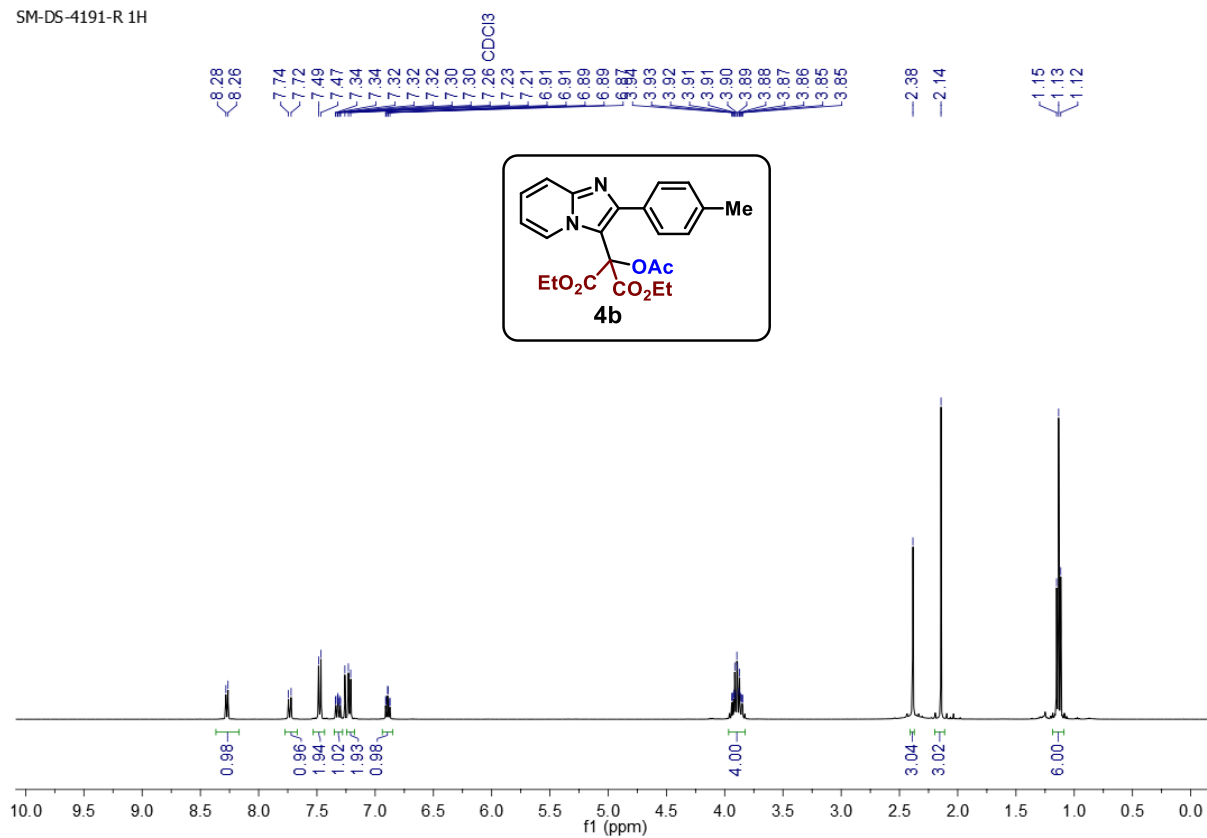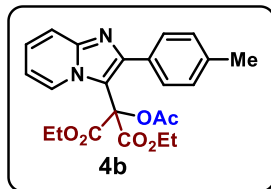

$^{13}\text{C}\{^1\text{H}\}$  NMR of **4b** (101 MHz,  $\text{CDCl}_3$ ):

SM-D5-4191-R 13C

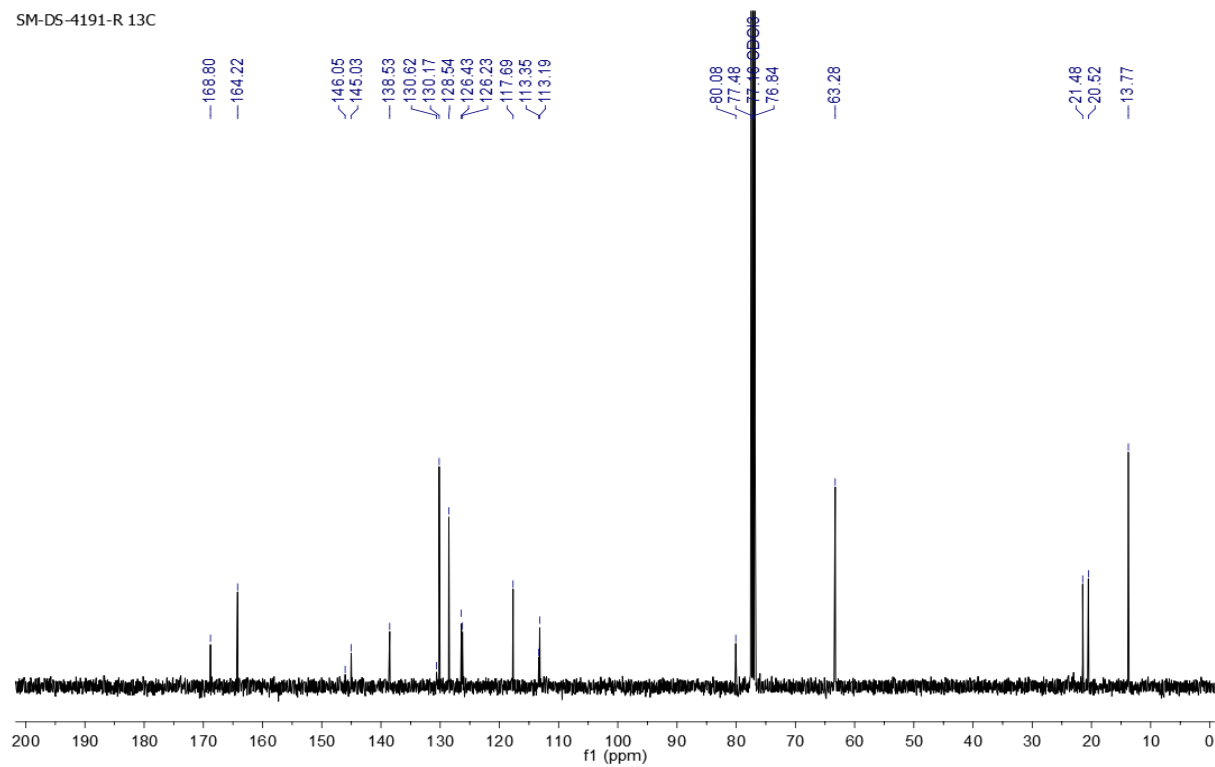



$^1\text{H}$  NMR of **4c** (400 MHz,  $\text{CDCl}_3$ ):

SM-DS-4192-R 1H

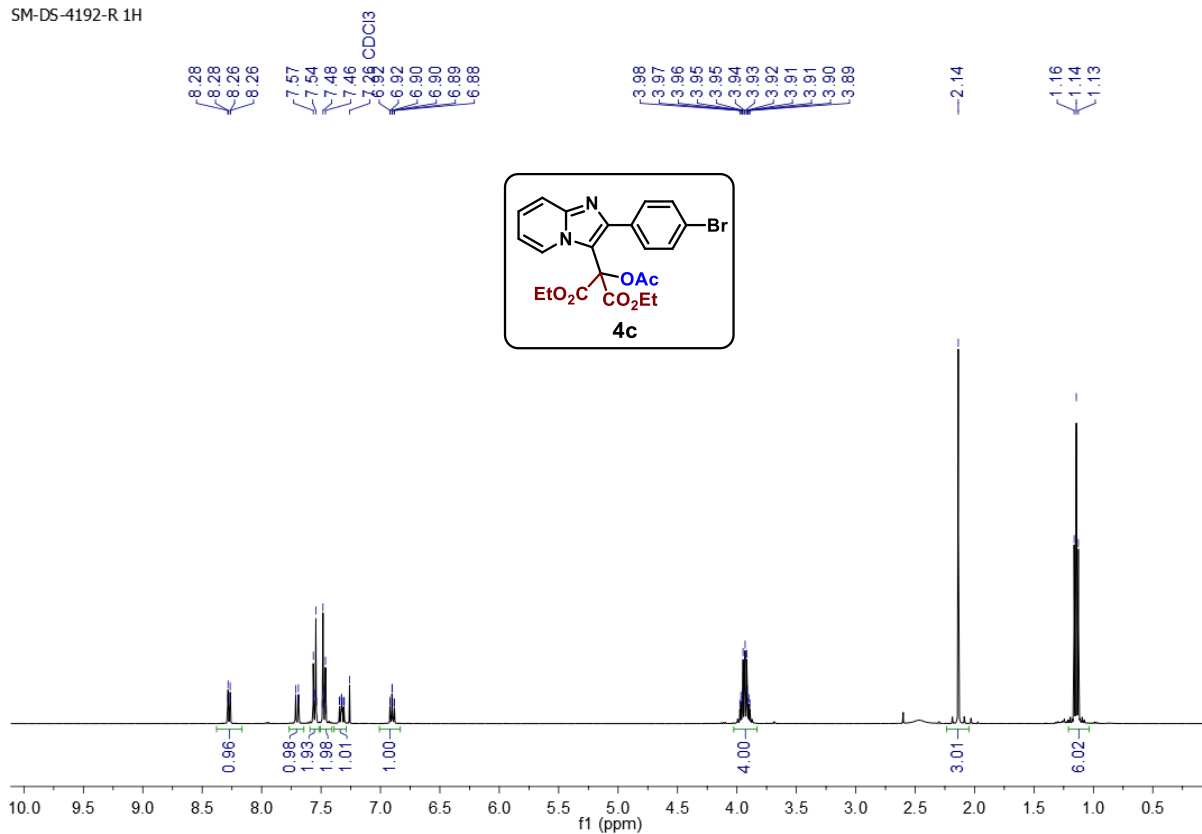

$^{13}\text{C}\{^1\text{H}\}$  NMR of **4c** (101 MHz,  $\text{CDCl}_3$ ):

SM-DS-4192-R 13C

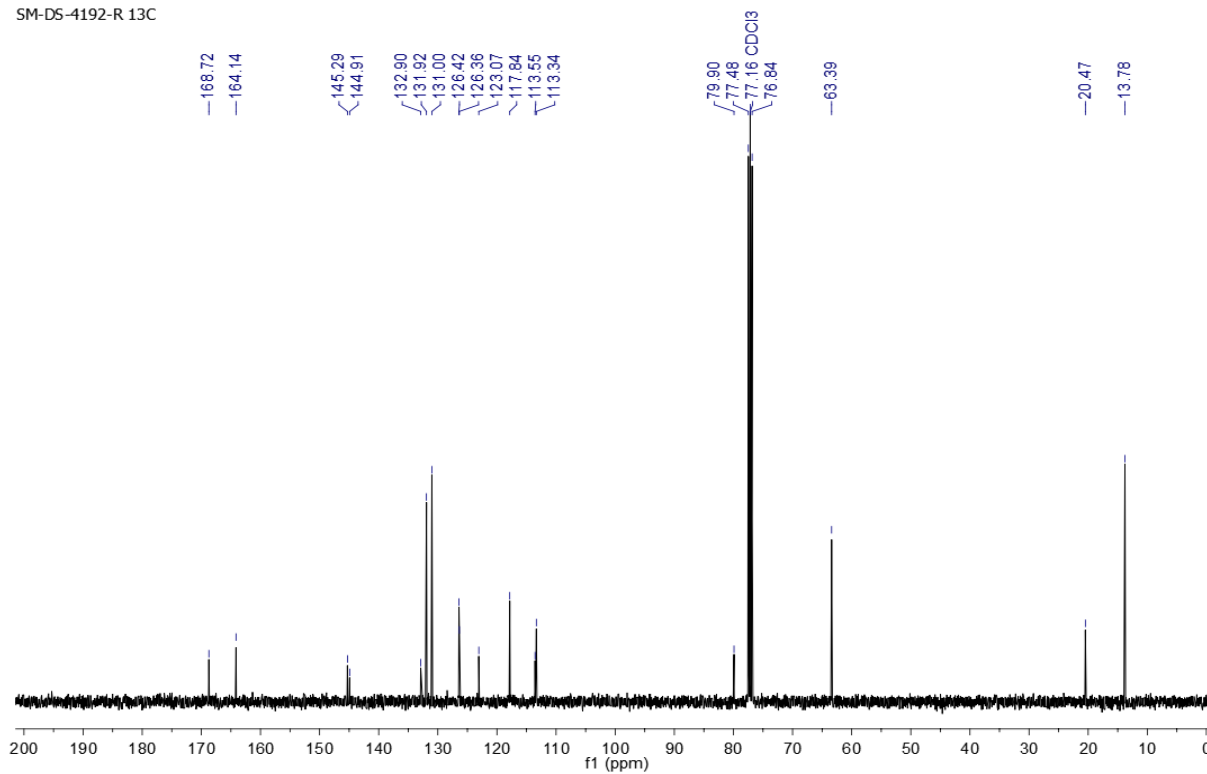

$^1\text{H}$  NMR of **4d** (400 MHz,  $\text{CDCl}_3$ ):

SM-DS-4204 1H

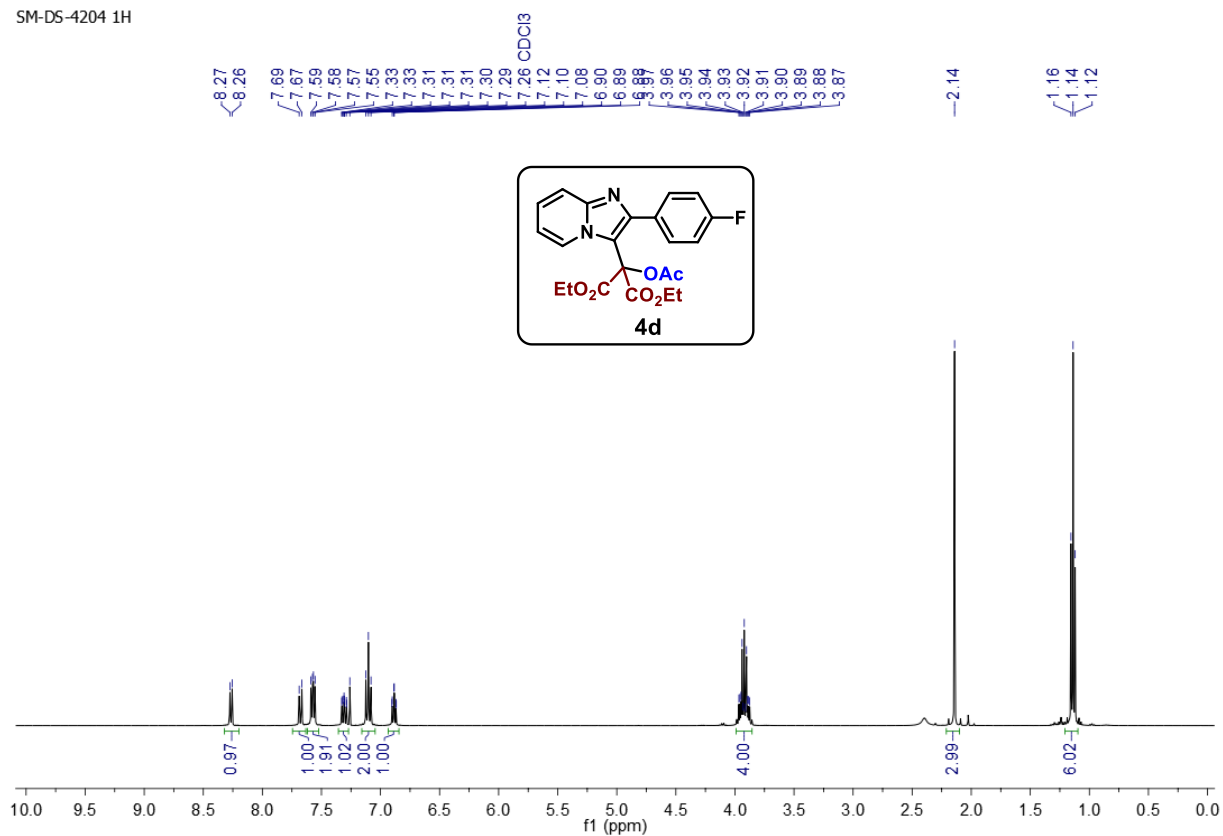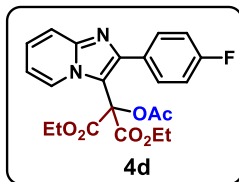

$^{13}\text{C}\{^1\text{H}\}$  NMR of **4d** (101 MHz,  $\text{CDCl}_3$ ):

SM-DS-4204 13C

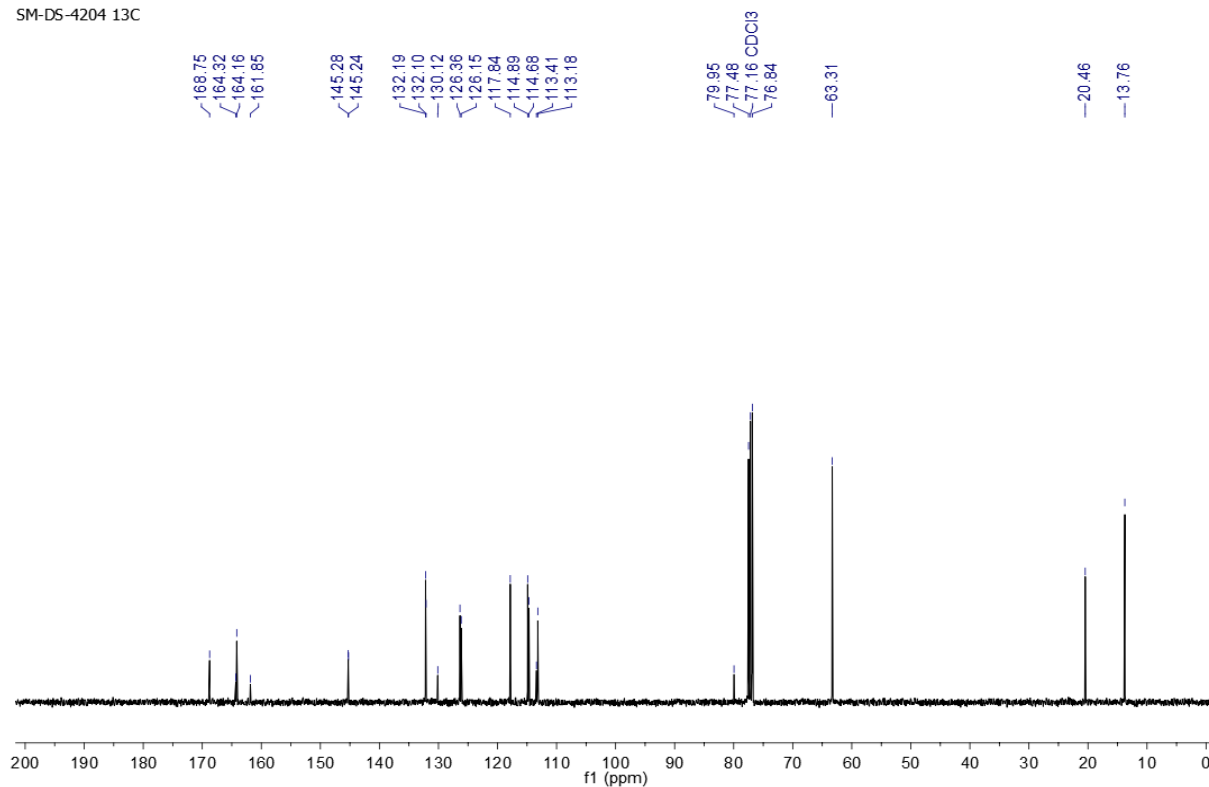

$^{19}\text{F}\{^1\text{H}\}$  NMR of **4d** (377 MHz,  $\text{CDCl}_3$ ):

SM-D5-4204 19F

---113.06

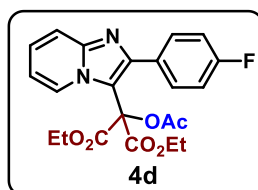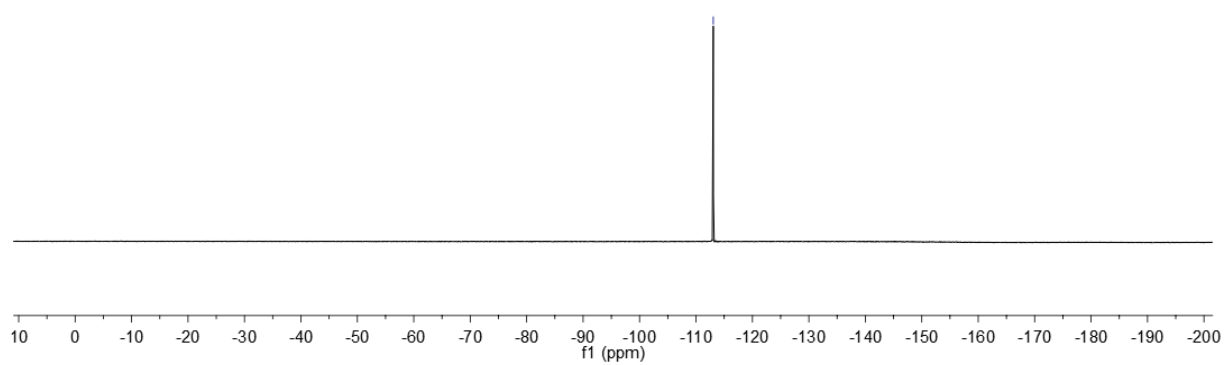

$^1\text{H}$  NMR of **4e** (400 MHz,  $\text{CDCl}_3$ ):

SM-DS-4205 1H

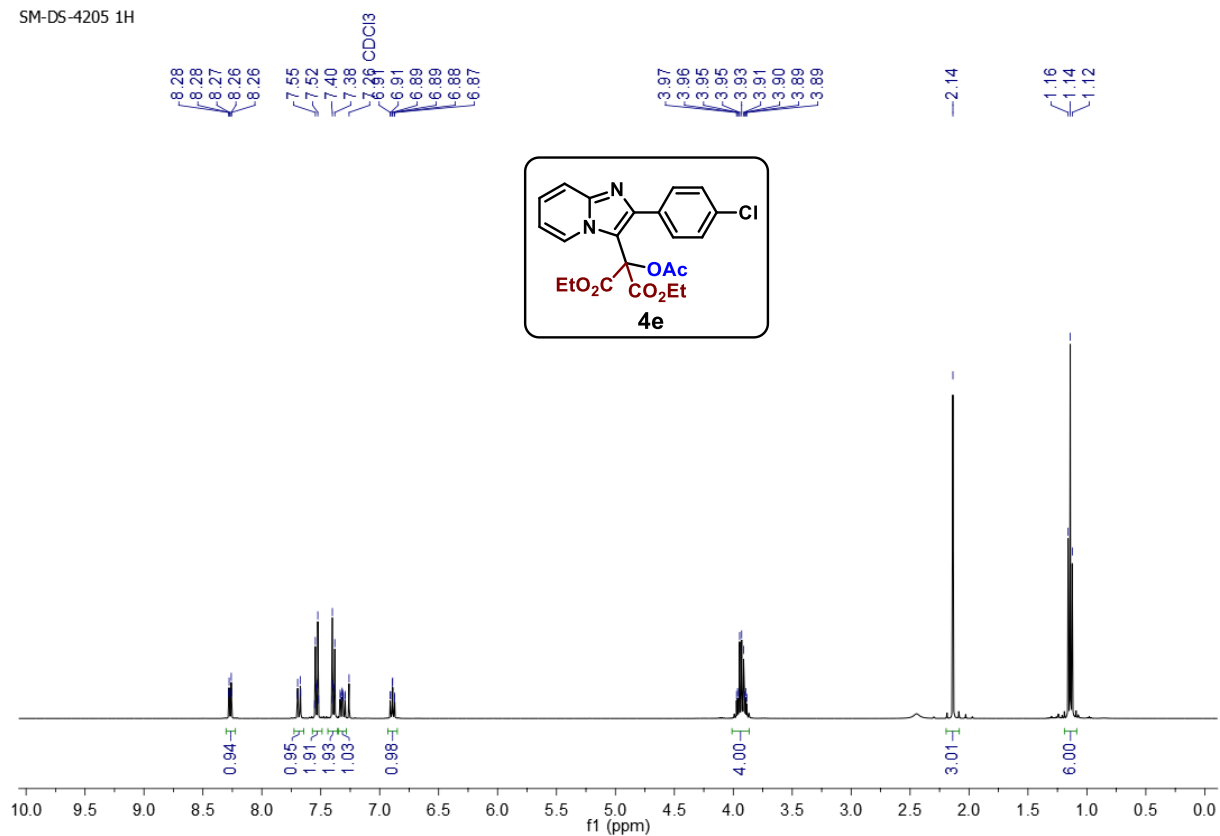

$^{13}\text{C}\{^1\text{H}\}$  NMR of **4e** (101 MHz,  $\text{CDCl}_3$ ):

SM-DS-4205 13C

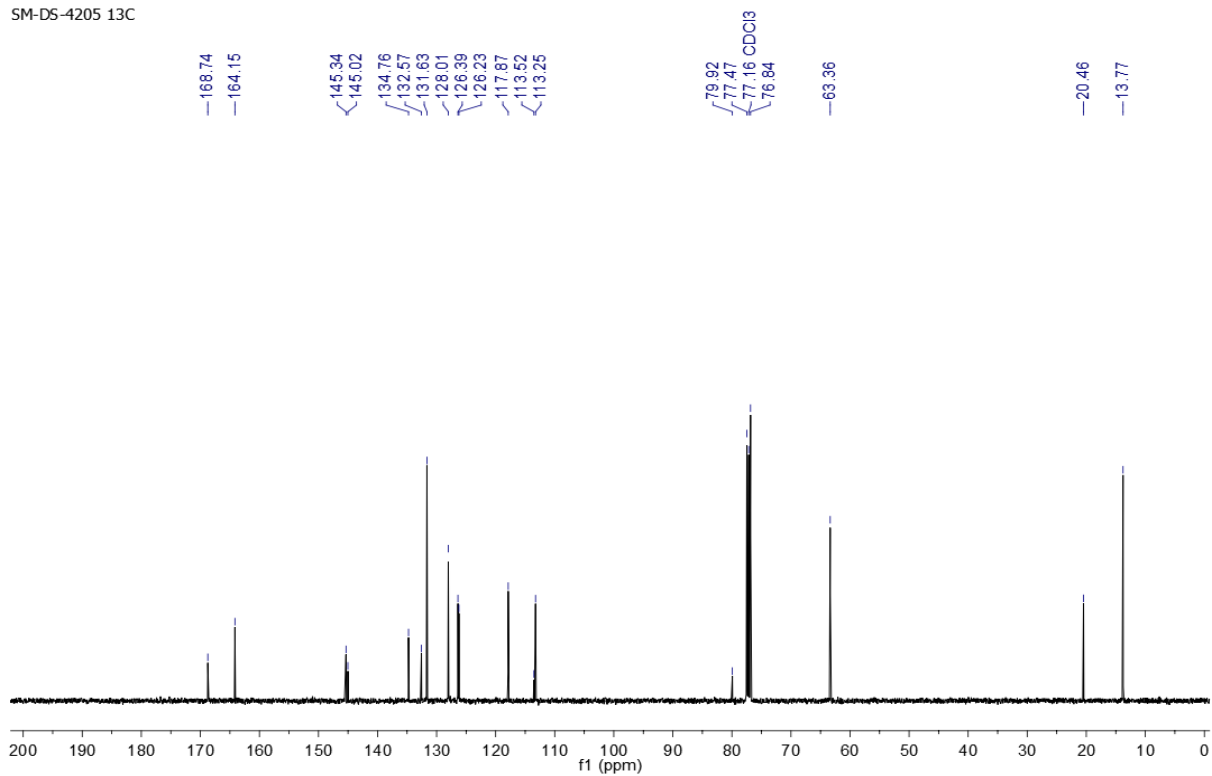

$^1\text{H}$  NMR of **4f** (400 MHz,  $\text{CDCl}_3$ ):

SM-DS-4200-R 1H

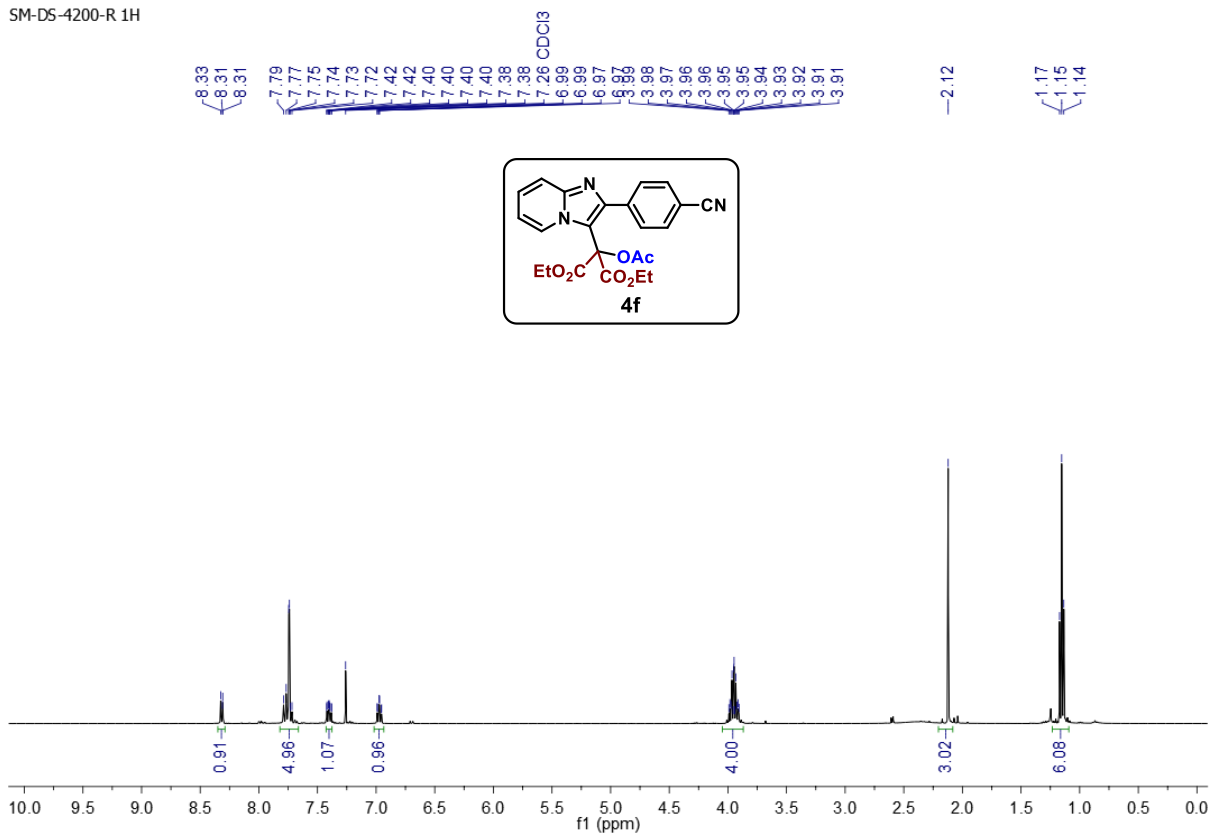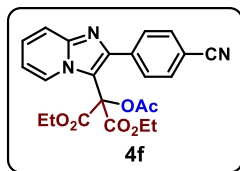

$^{13}\text{C}\{^1\text{H}\}$  NMR of **4f** (101 MHz,  $\text{CDCl}_3$ ):

SM-DS-4200-R 13C

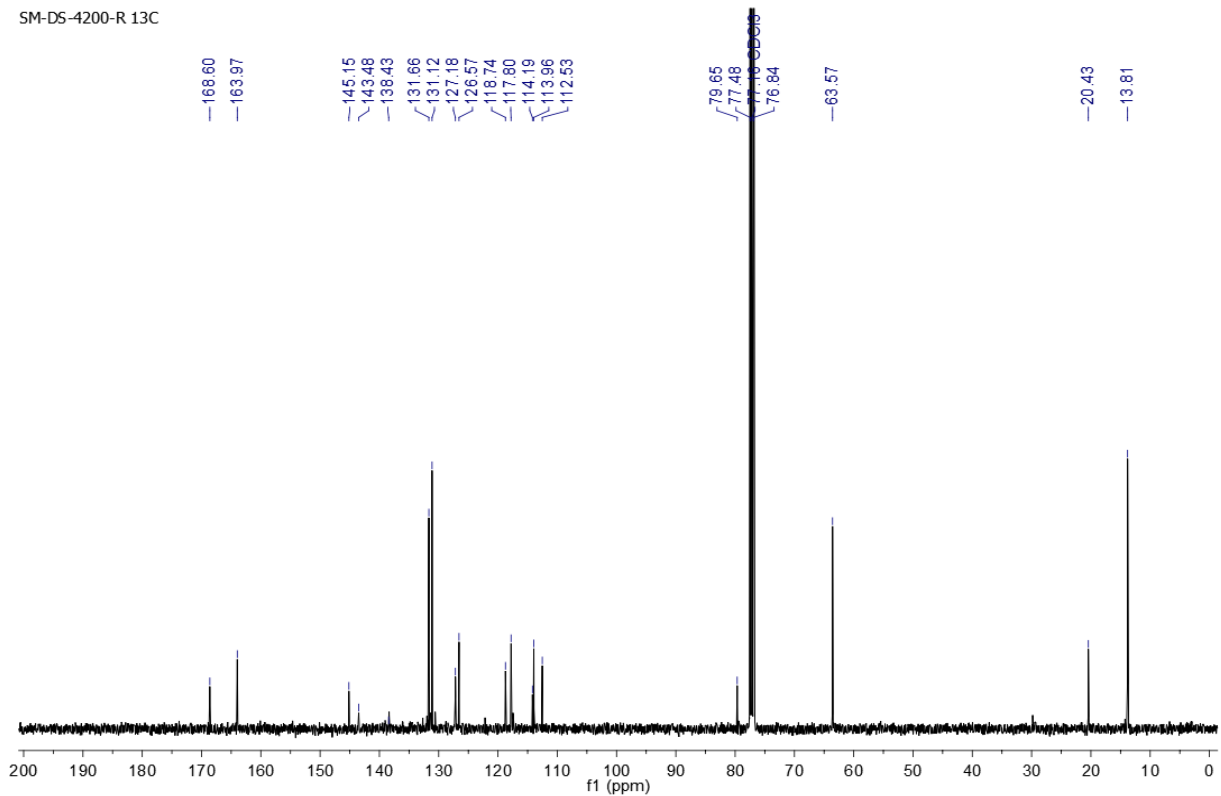

$^1\text{H}$  NMR of **4g** (400 MHz,  $\text{CDCl}_3$ ):

SM-DS-4199-R 1H

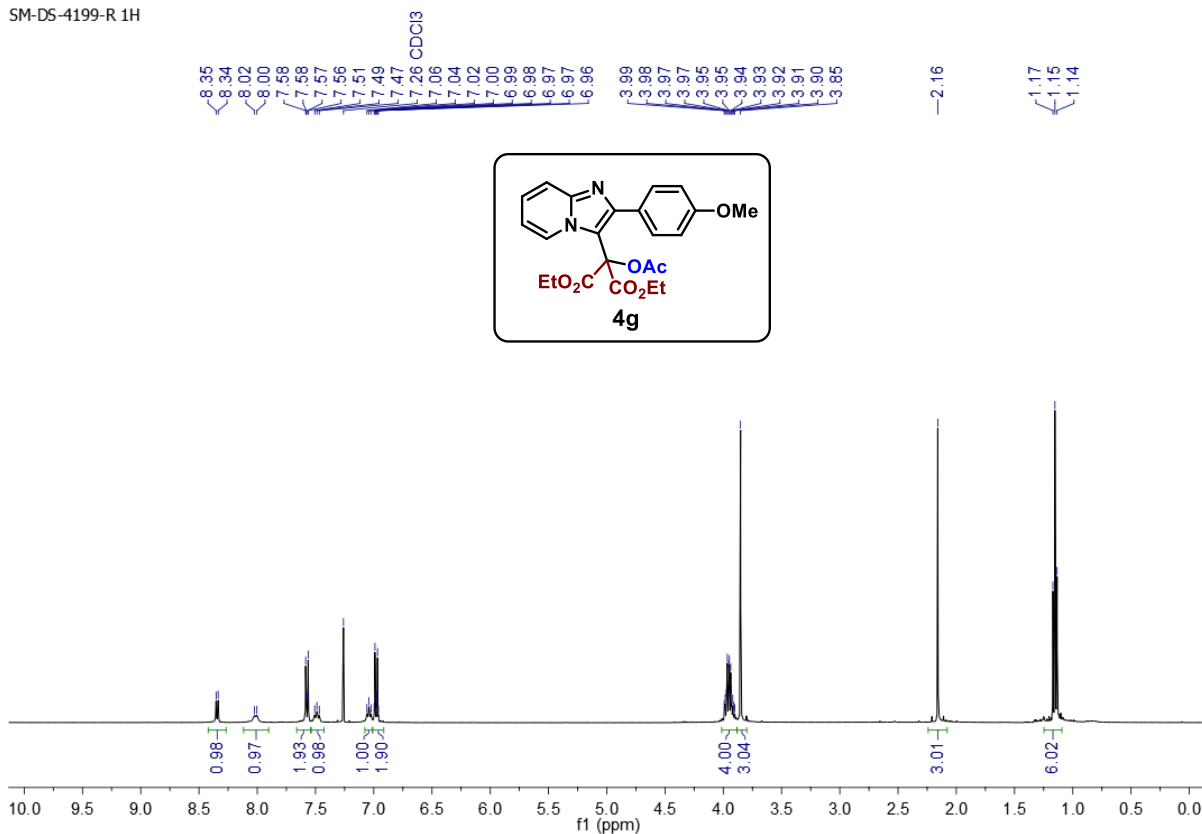

$^{13}\text{C}\{^1\text{H}\}$  NMR of **4g** (101 MHz,  $\text{CDCl}_3$ ):

SM-DS-4199 13C

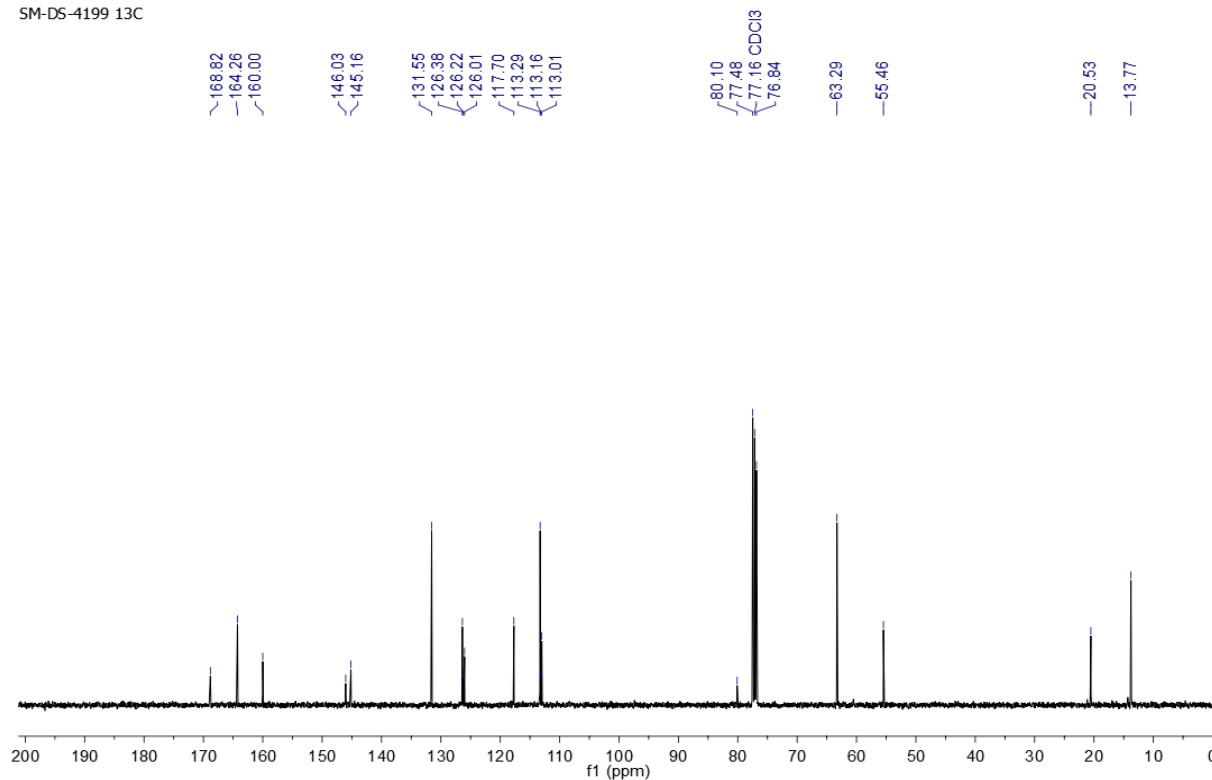

$^1\text{H}$  NMR of **4h** (400 MHz,  $\text{CDCl}_3$ ):

SM-DS-4194-R-1 1H

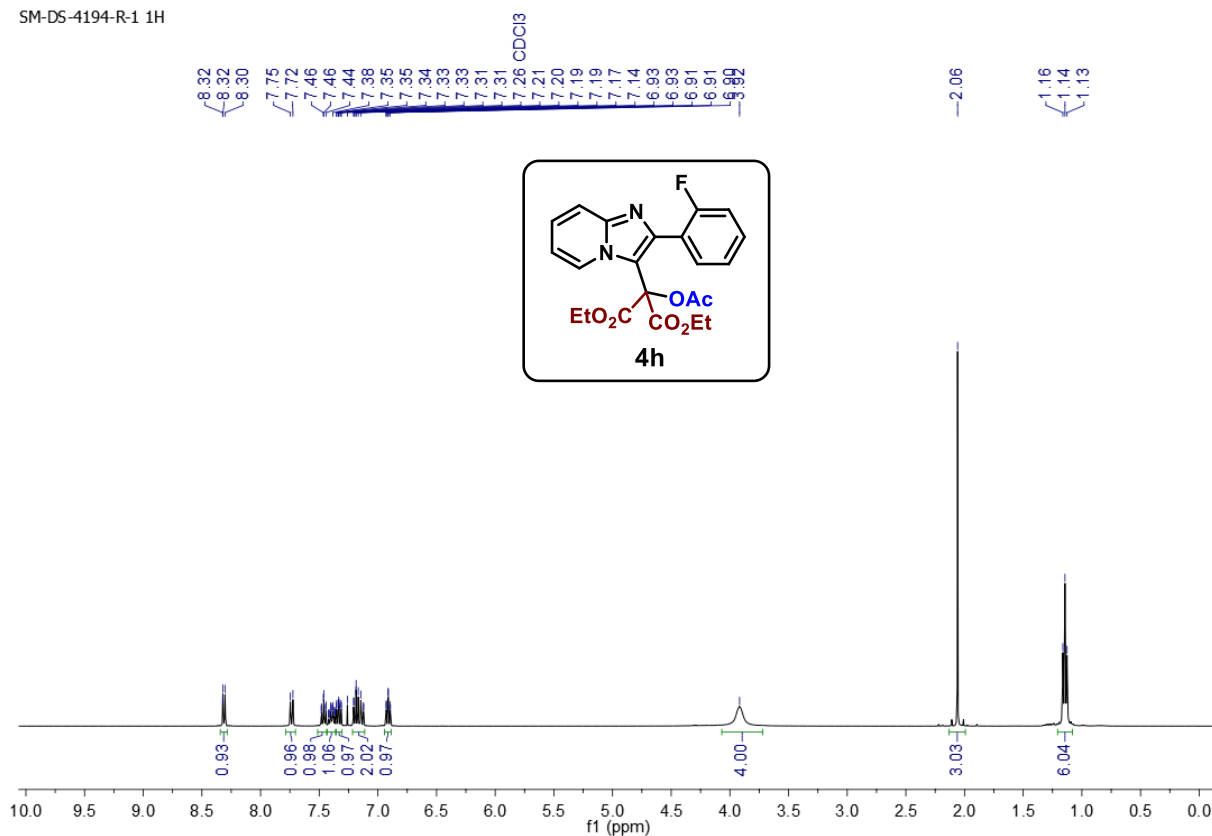

$^{13}\text{C}\{^1\text{H}\}$  NMR of **4h** (101 MHz,  $\text{CDCl}_3$ ):

SM-DS-4194-R-13C

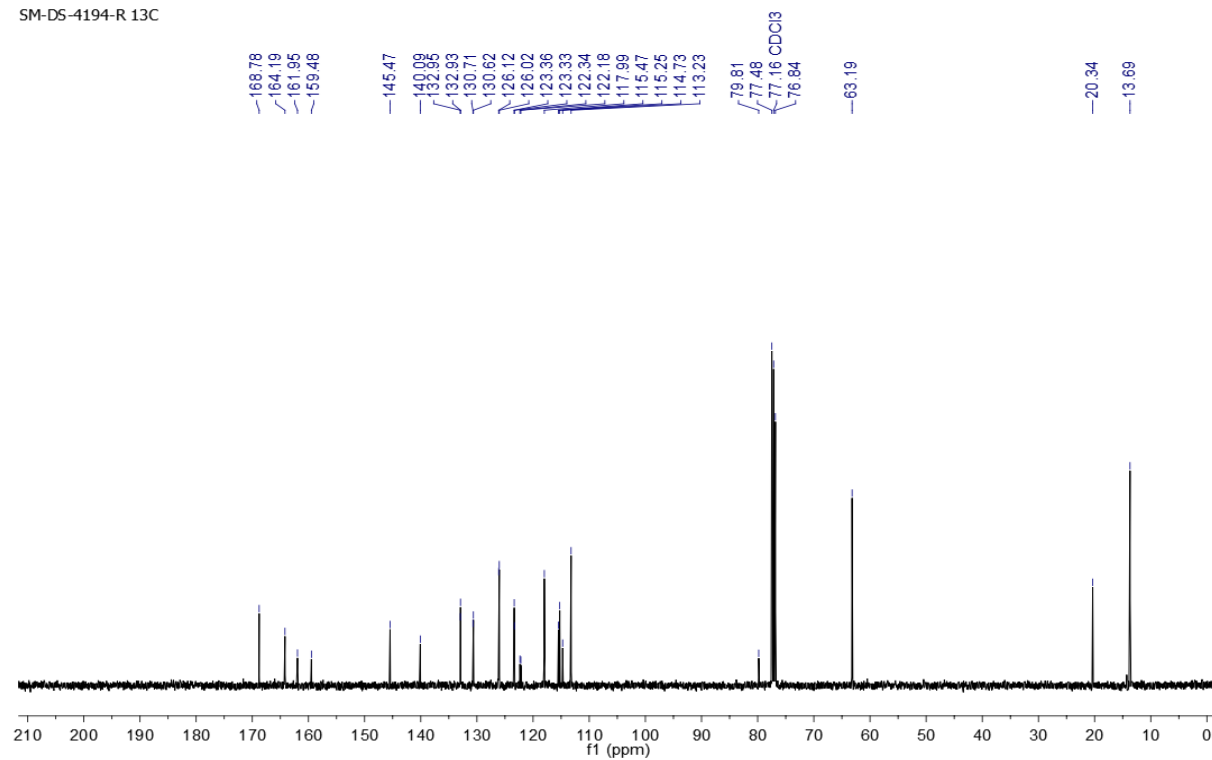

$^{19}\text{F}\{^1\text{H}\}$  NMR of **4h** (377 MHz,  $\text{CDCl}_3$ ):

SM-D5-4194-R 19F

---112.44

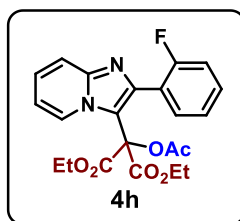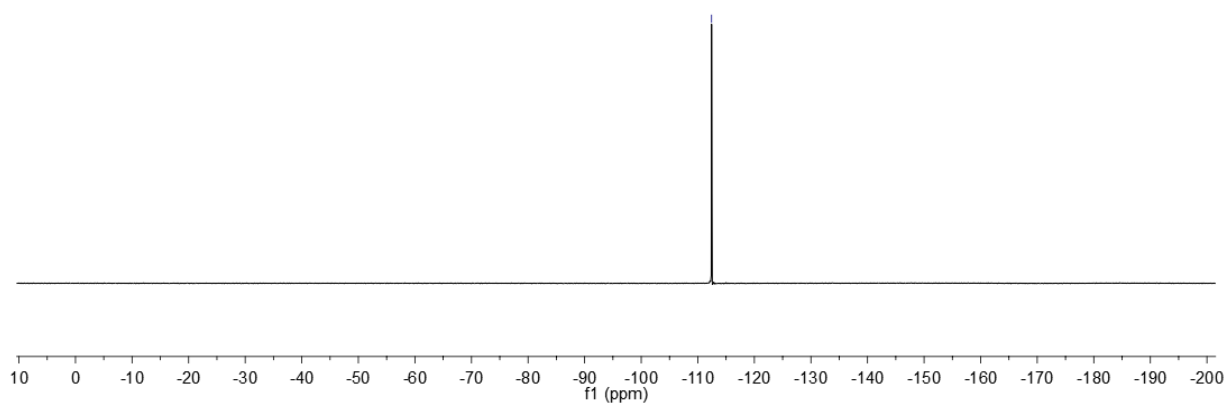



$^1\text{H}$  NMR of **4i** (400 MHz,  $\text{CDCl}_3$ ):

SM-DS-4215 1H

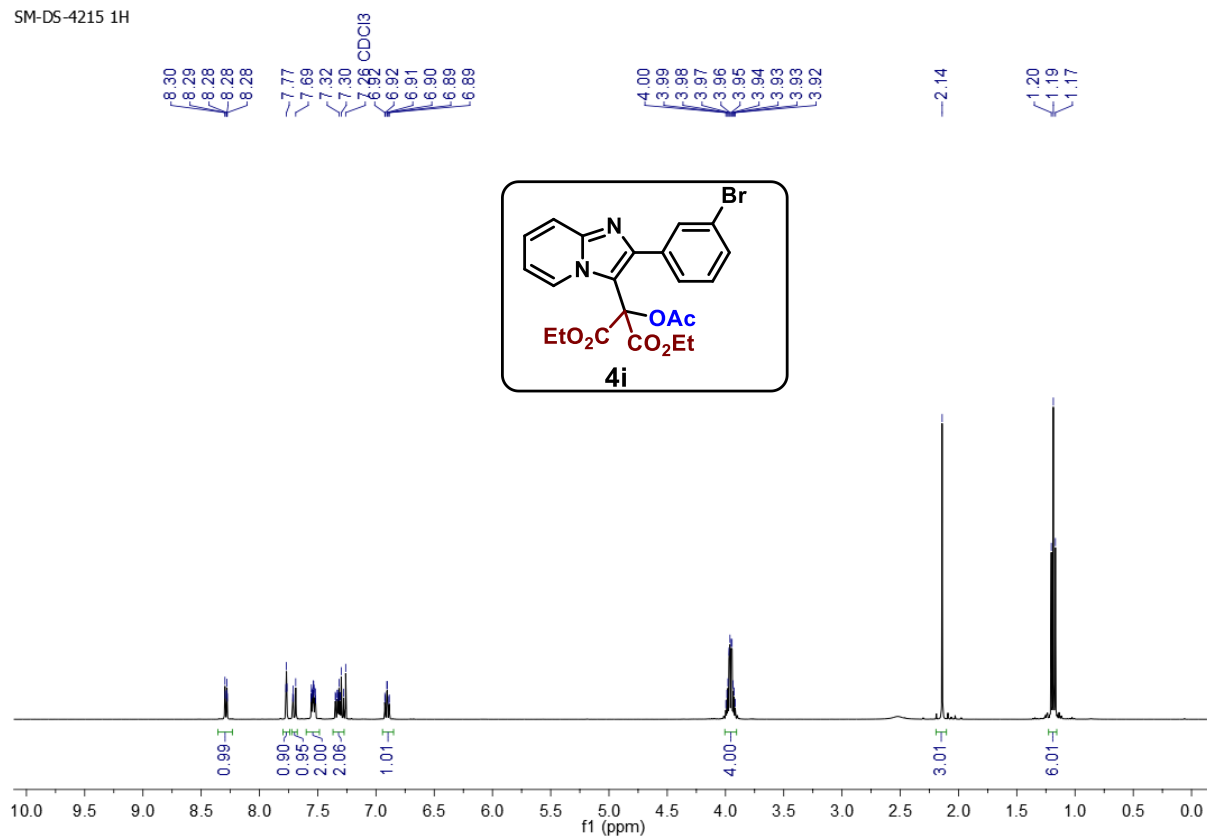

$^{13}\text{C}\{^1\text{H}\}$  NMR of **4i** (101 MHz,  $\text{CDCl}_3$ ):

SM-DS-4215 13C

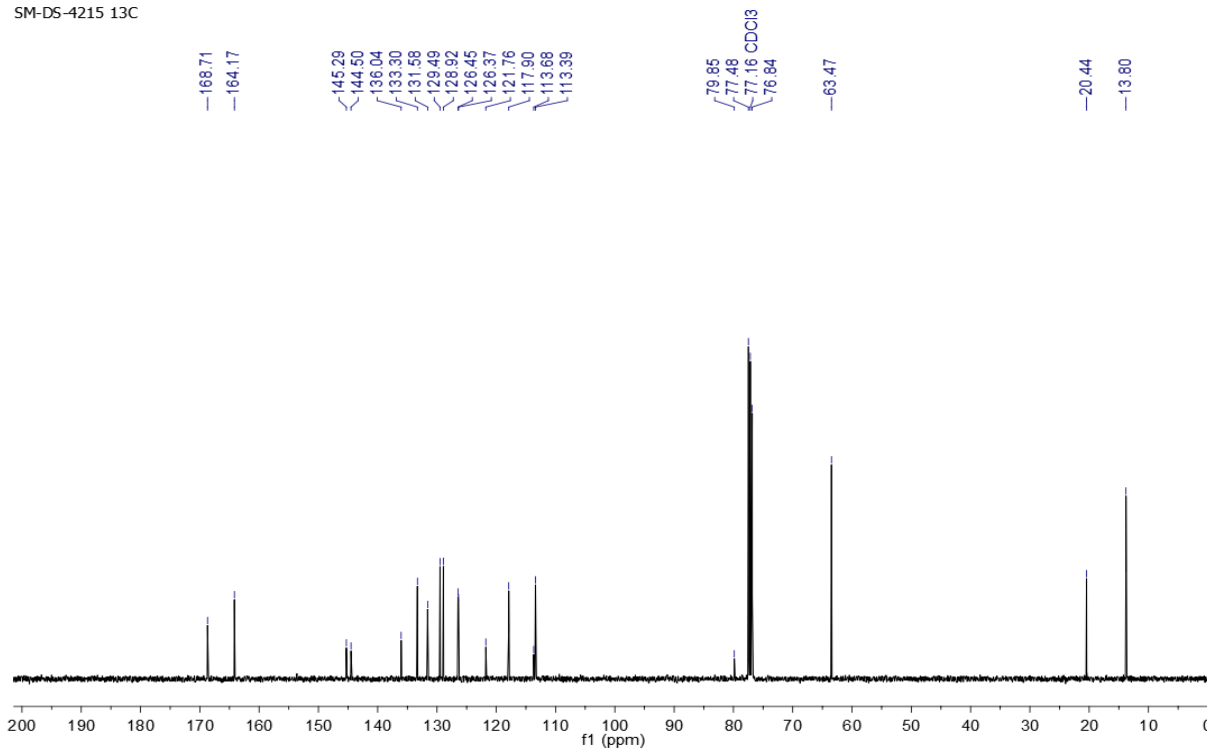

$^1\text{H}$  NMR of **4j** (400 MHz,  $\text{CDCl}_3$ ):

SM-DS-4210 1H

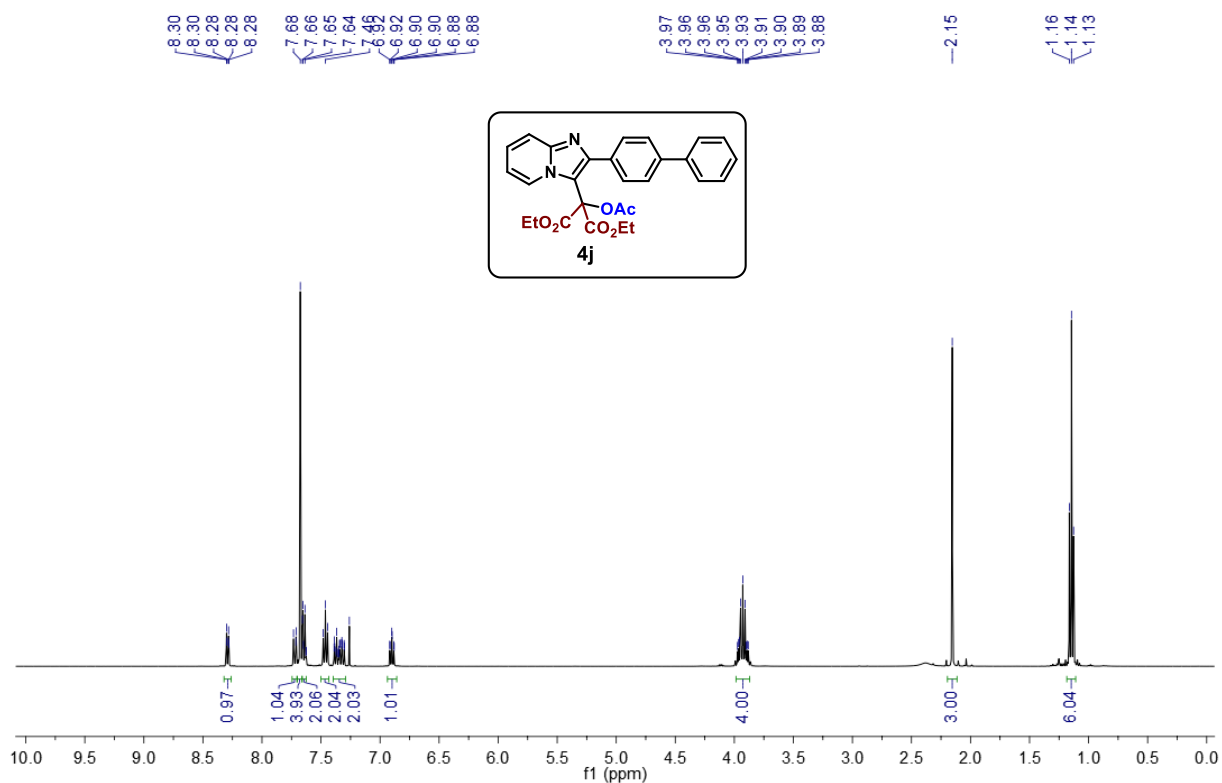

$^{13}\text{C}\{^1\text{H}\}$  NMR of **4j** (101 MHz,  $\text{CDCl}_3$ ):

SM-DS-4210 13C

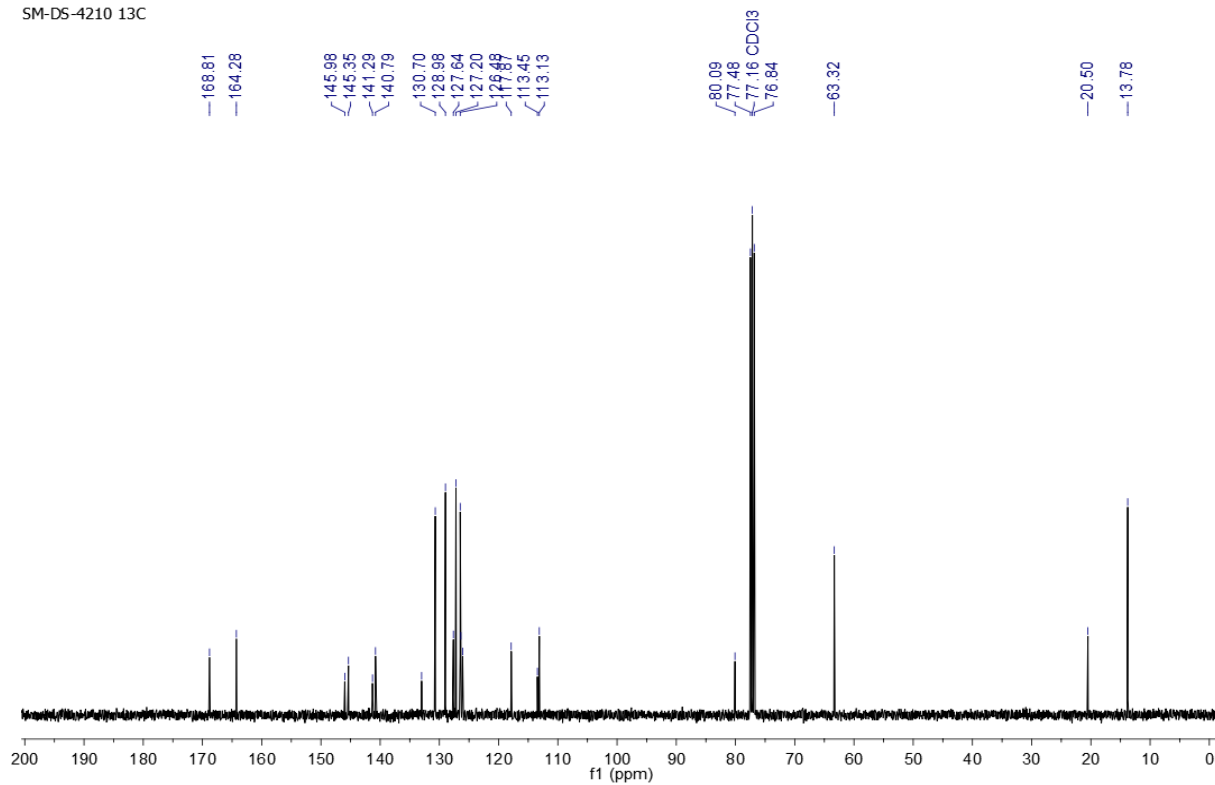

$^1\text{H}$  NMR of **4k** (400 MHz,  $\text{CDCl}_3$ ):

SM-DS-4198 1H

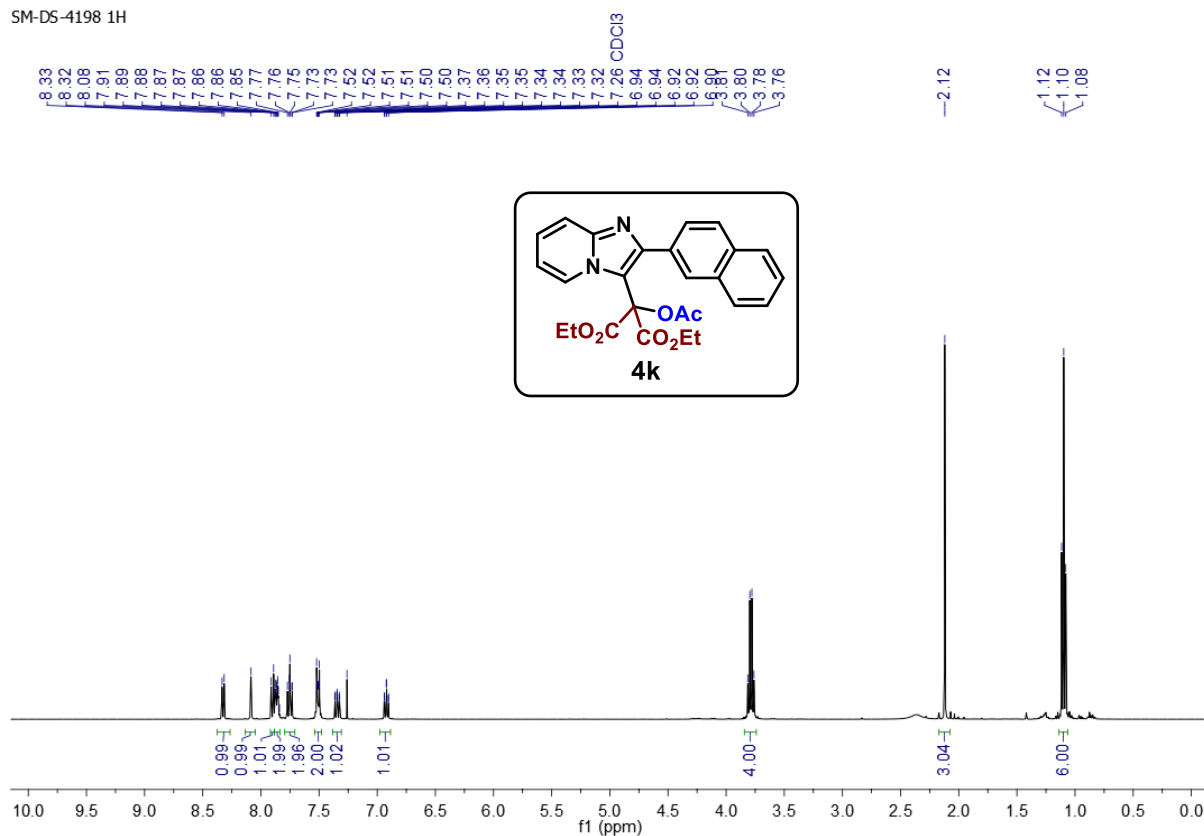

$^{13}\text{C}\{^1\text{H}\}$  NMR of **4k** (101 MHz,  $\text{CDCl}_3$ ):

SM-DS-4198 13C

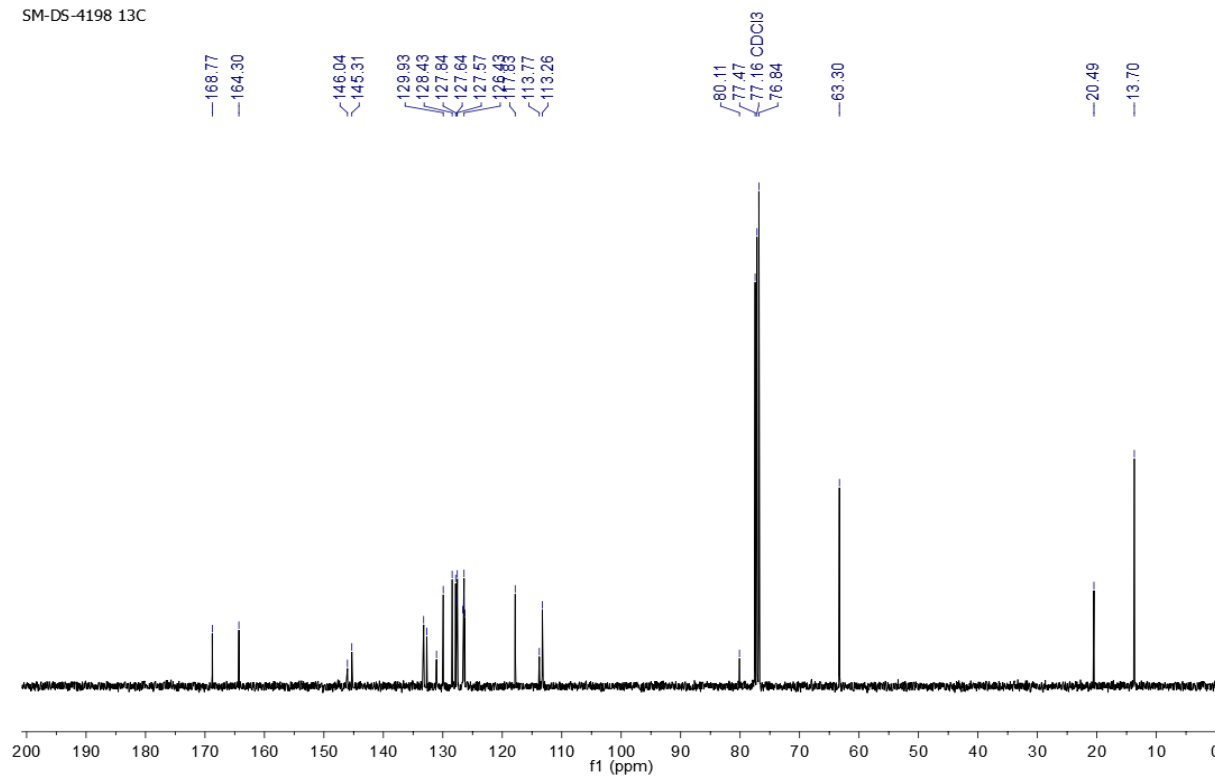

$^1\text{H}$  NMR of **41** (400 MHz,  $\text{CDCl}_3$ ):

SM-D5-4218 1H

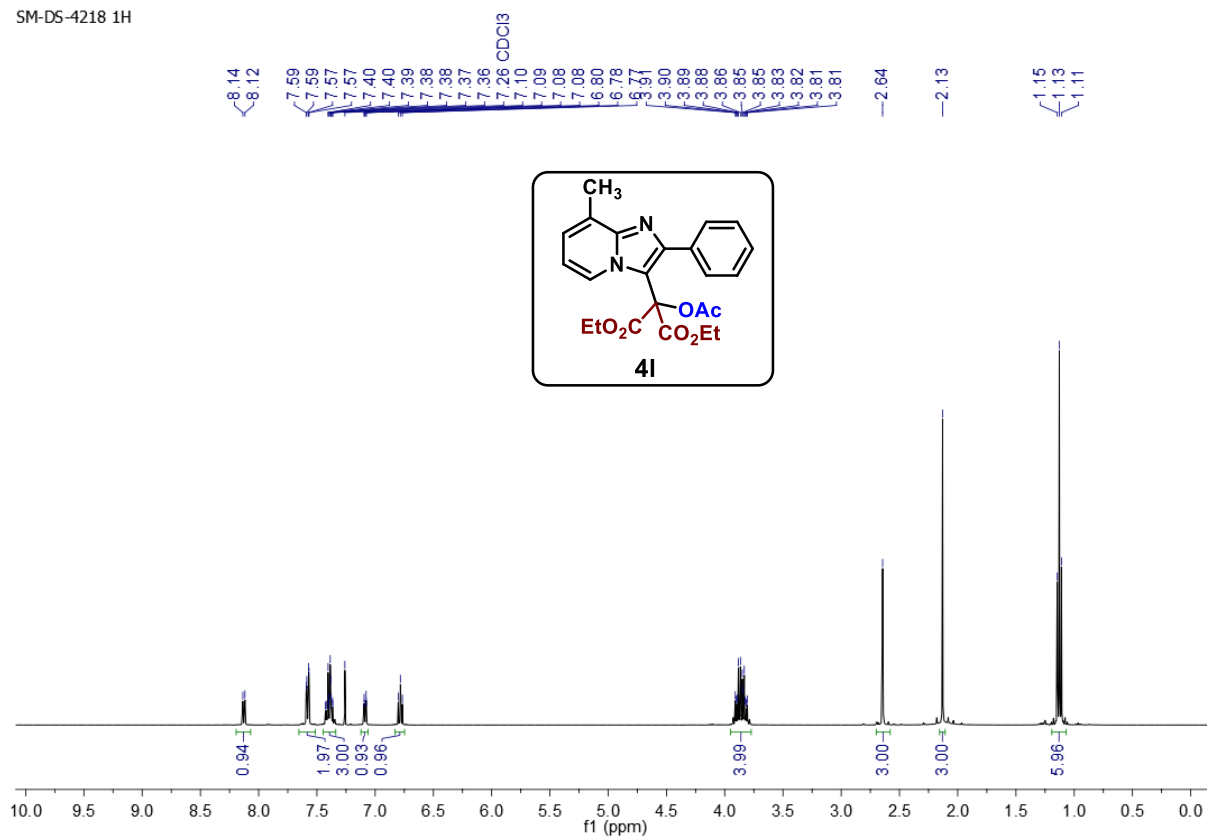

$^{13}\text{C}\{^1\text{H}\}$  NMR of **41** (101 MHz,  $\text{CDCl}_3$ ):

SM-D5-4218 13C

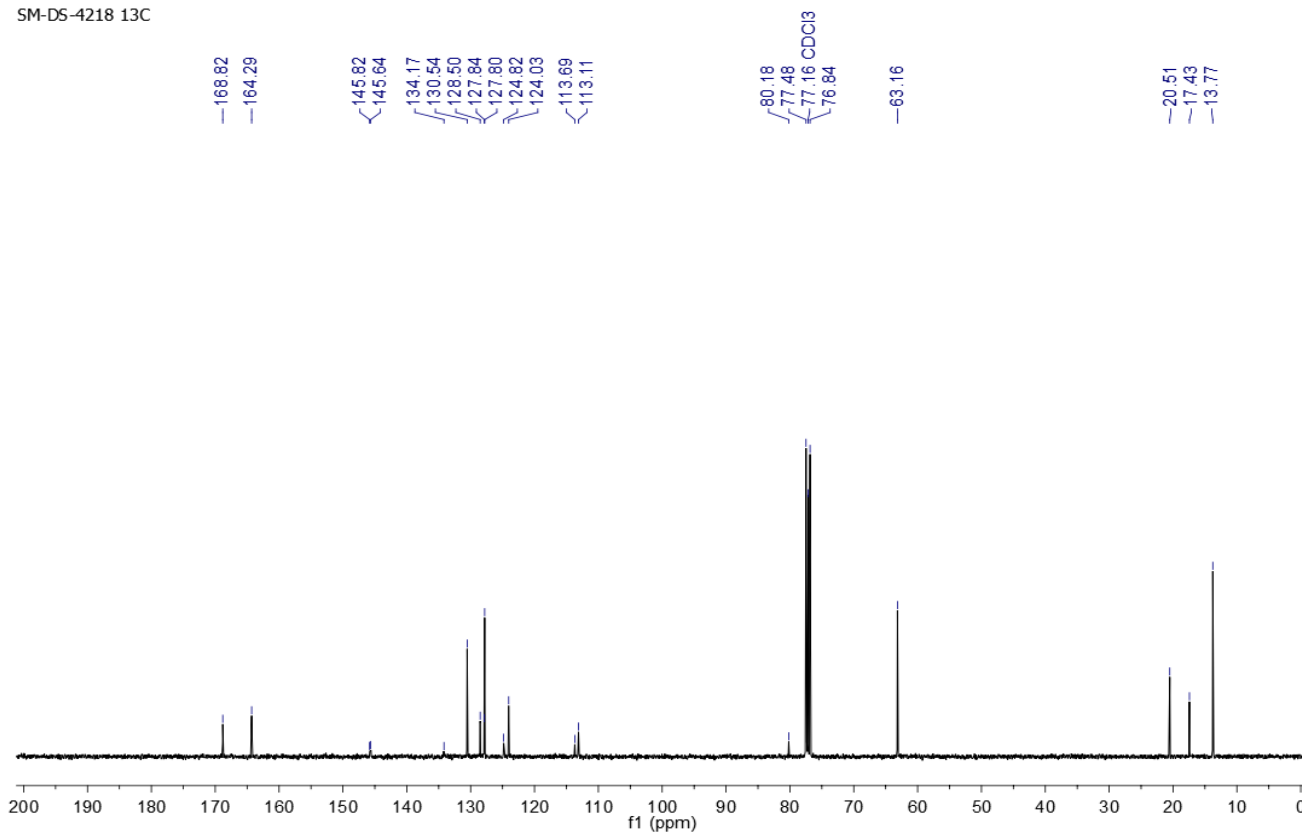

<sup>1</sup>H NMR of **4m** (400 MHz, CDCl<sub>3</sub>):

SM-DS-4219 1H

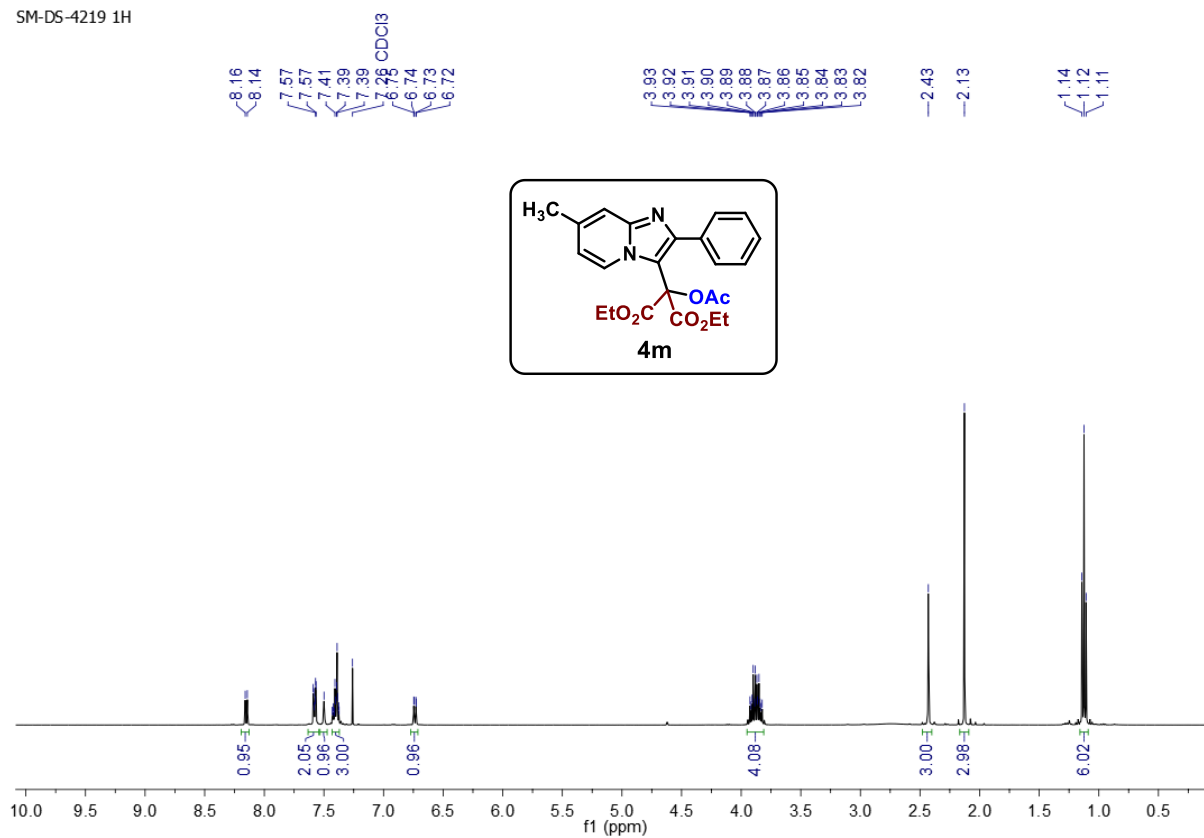

<sup>13</sup>C { <sup>1</sup>H } NMR of **4m** (101 MHz, CDCl<sub>3</sub>):

SM-DS-4219 13C

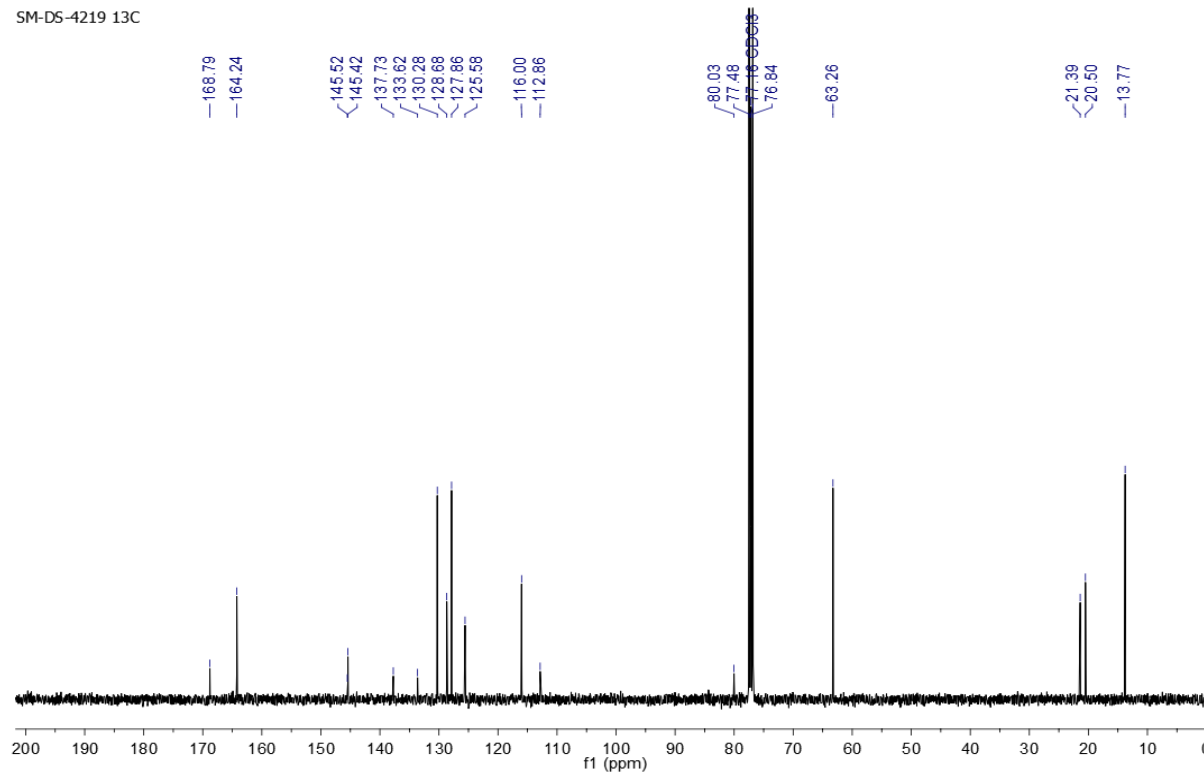

$^1\text{H}$  NMR of **4n** (400 MHz,  $\text{CDCl}_3$ ):

SM-DS-4221-R-1 1H

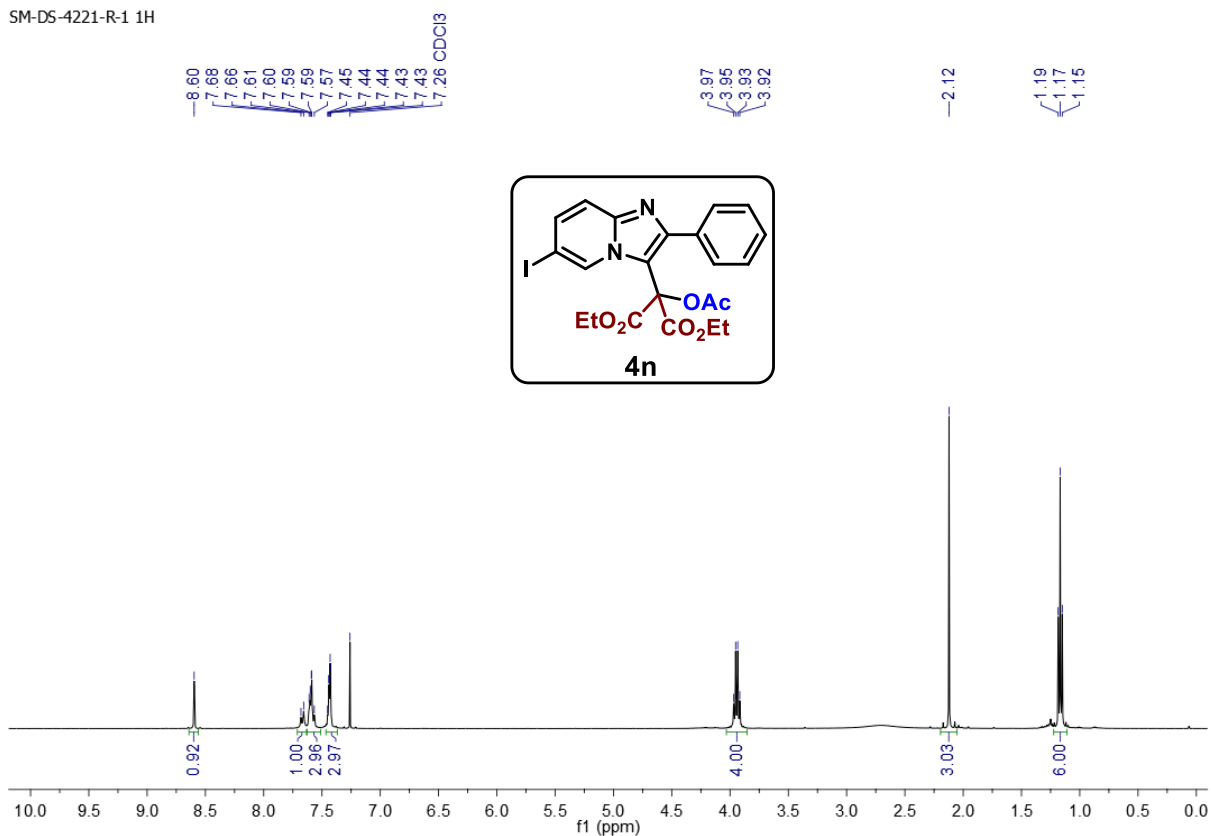

$^{13}\text{C}\{^1\text{H}\}$  NMR of **4n** (101 MHz,  $\text{CDCl}_3$ ):

SM-DS-4221-R-2 13C

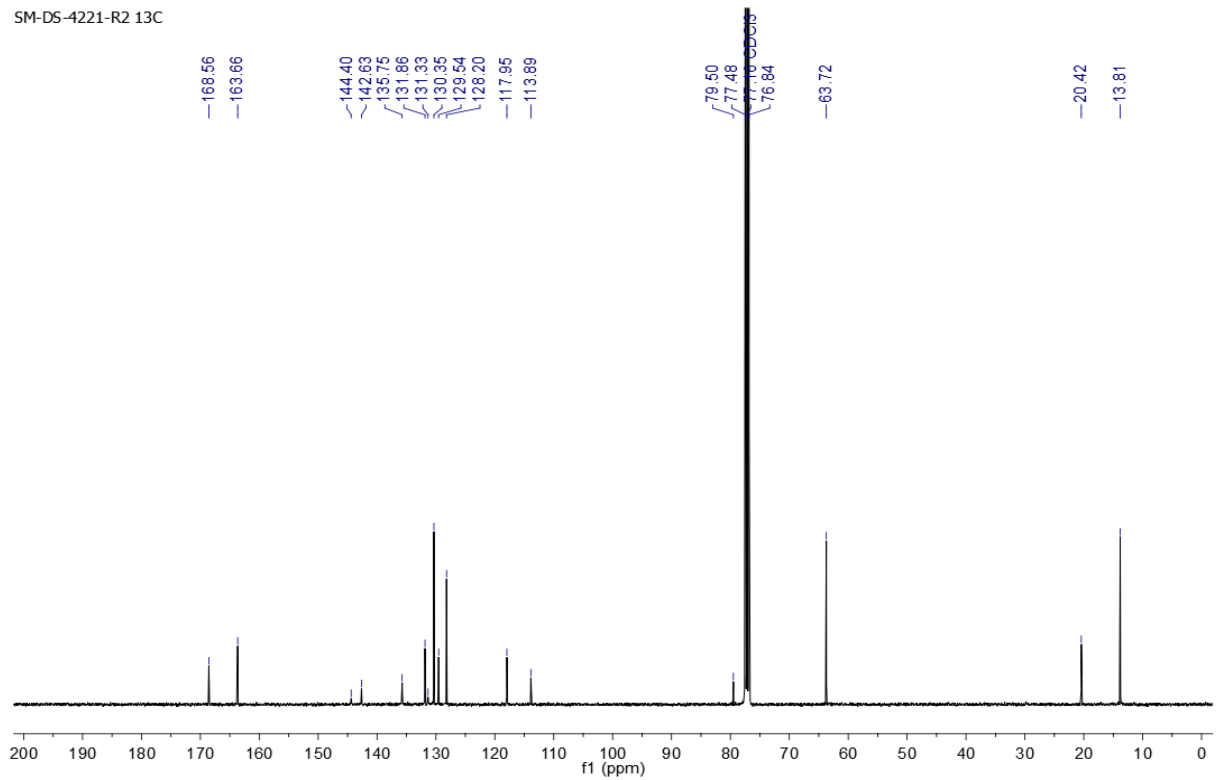

$^1\text{H}$  NMR of **4o** (400 MHz,  $\text{CDCl}_3$ ):

SM-D5-4220-R 1H

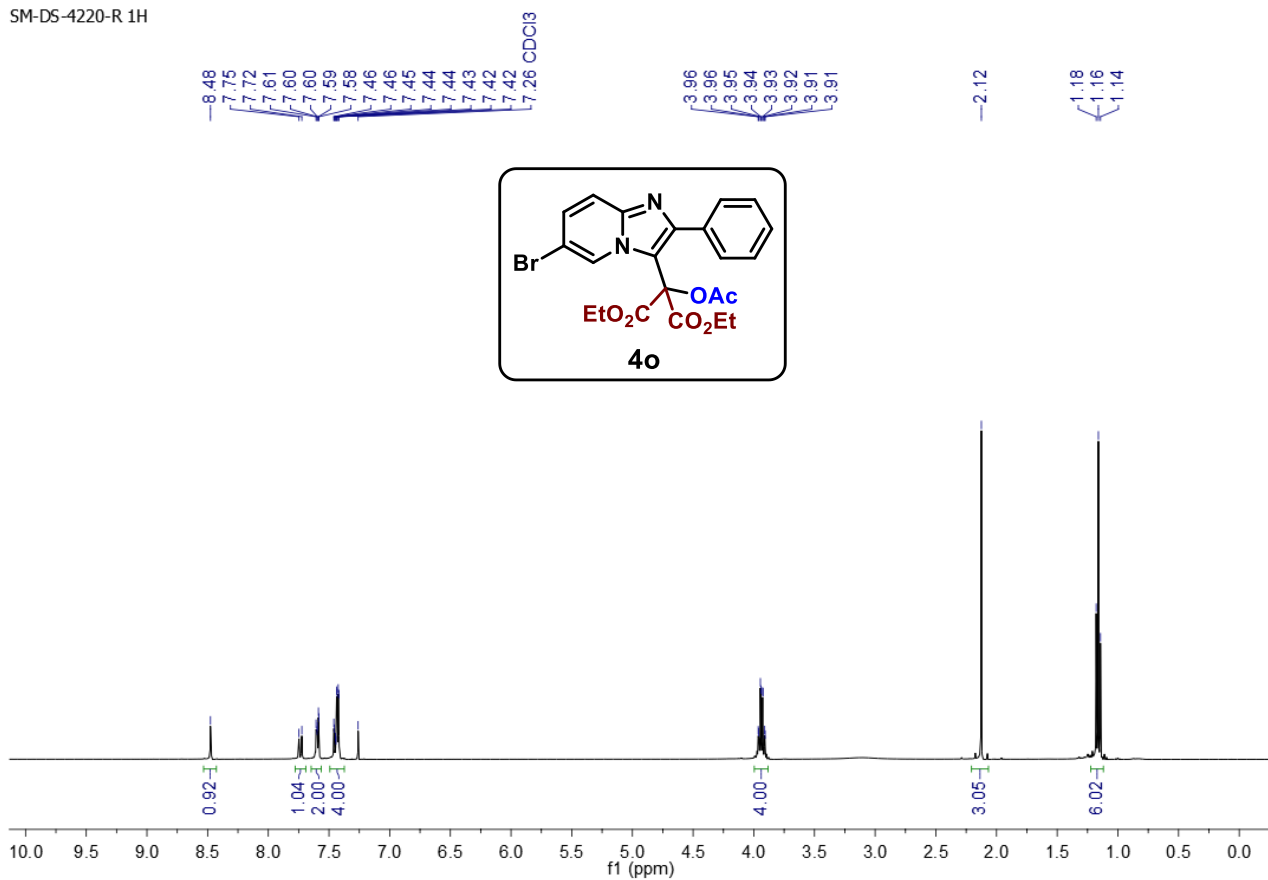

$^{13}\text{C}\{^1\text{H}\}$  NMR of **4o** (101 MHz,  $\text{CDCl}_3$ ):

SM-D5-4220 13C

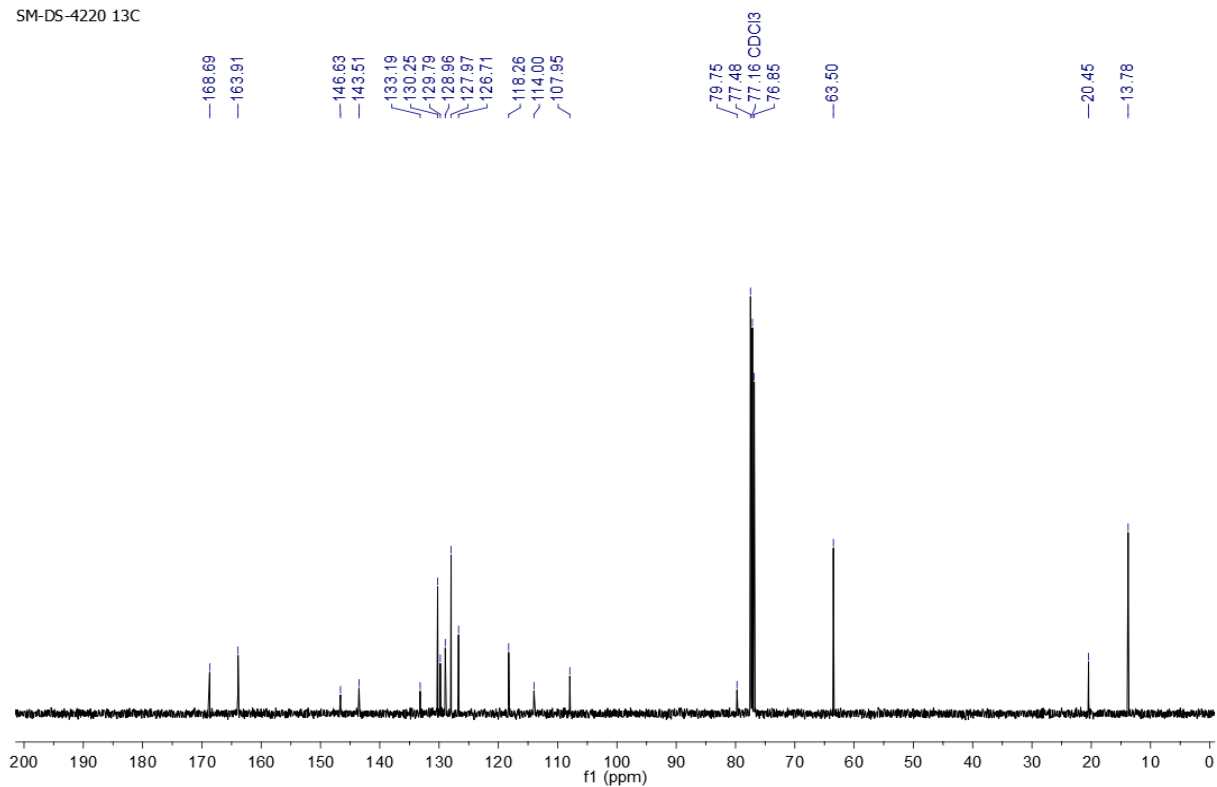

$^1\text{H}$  NMR of **4p** (400 MHz,  $\text{CDCl}_3$ ):

SM-DS-4224-L 1H

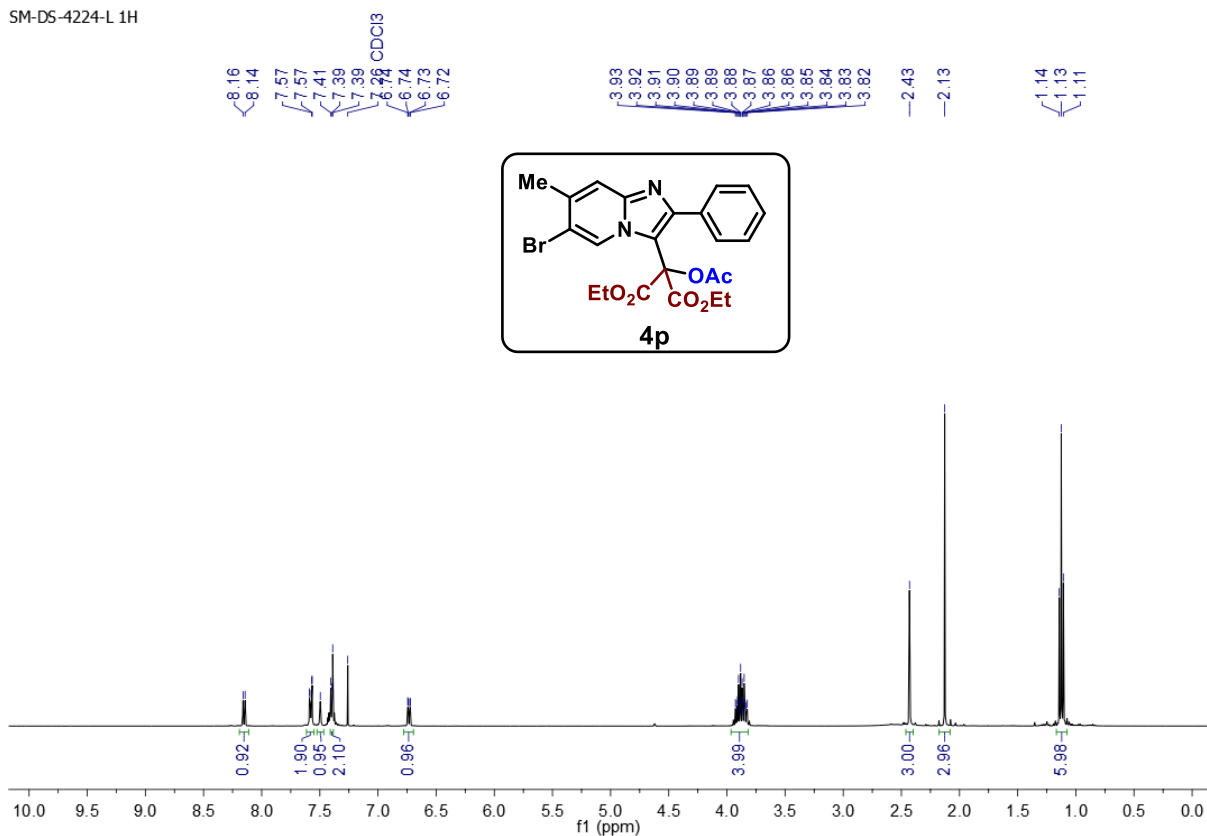

$^{13}\text{C}\{^1\text{H}\}$  NMR of **4p** (101 MHz,  $\text{CDCl}_3$ ):

SM-DS-4224-L 13C

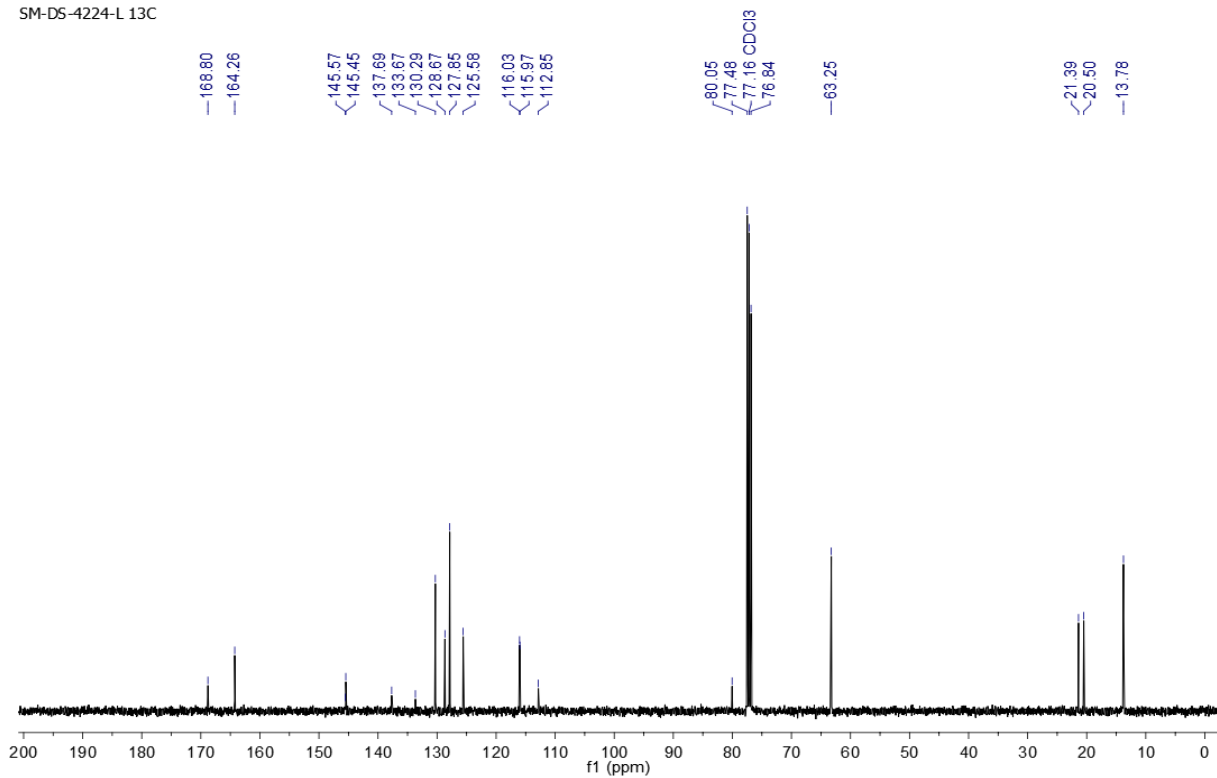



$^1\text{H}$  NMR of **4q** (400 MHz,  $\text{CDCl}_3$ ):

SM-DS-4222 1H

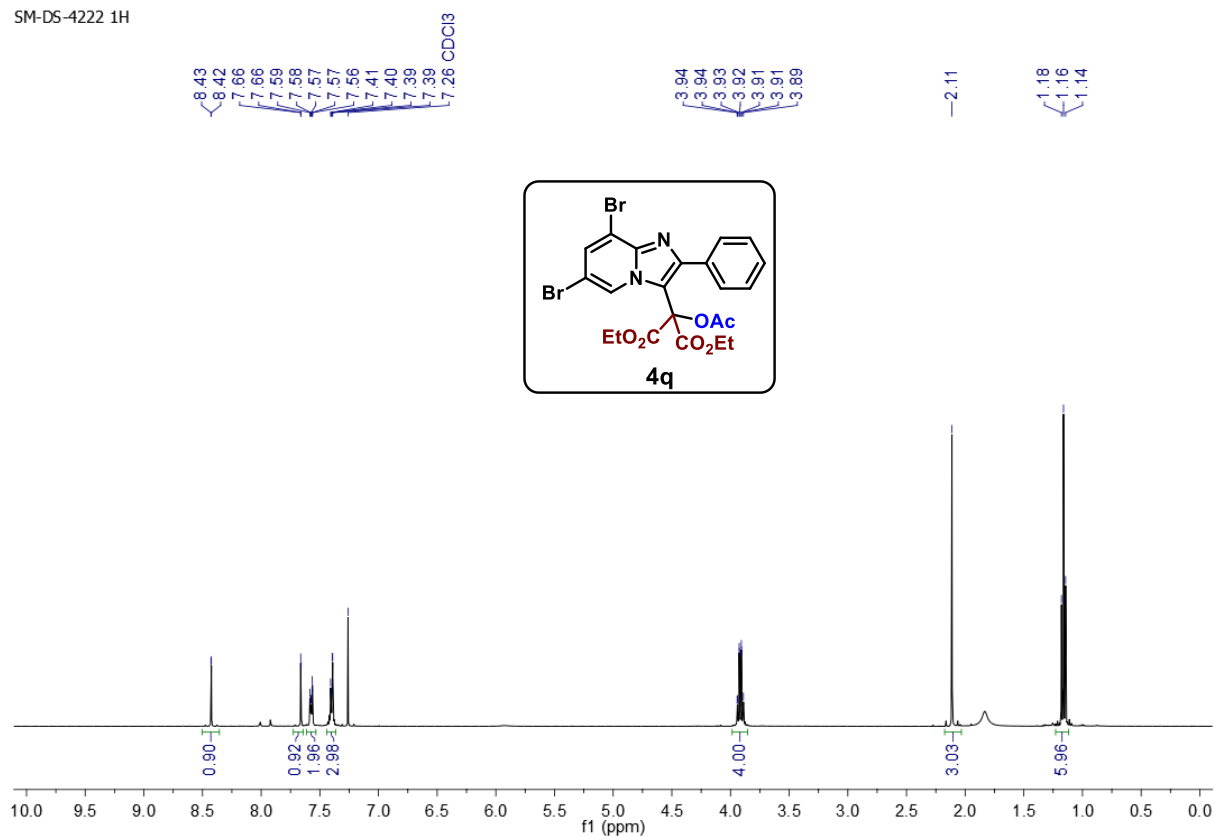

$^{13}\text{C}\{^1\text{H}\}$  NMR of **4q** (101 MHz,  $\text{CDCl}_3$ ):

SM-DS-4222 13C

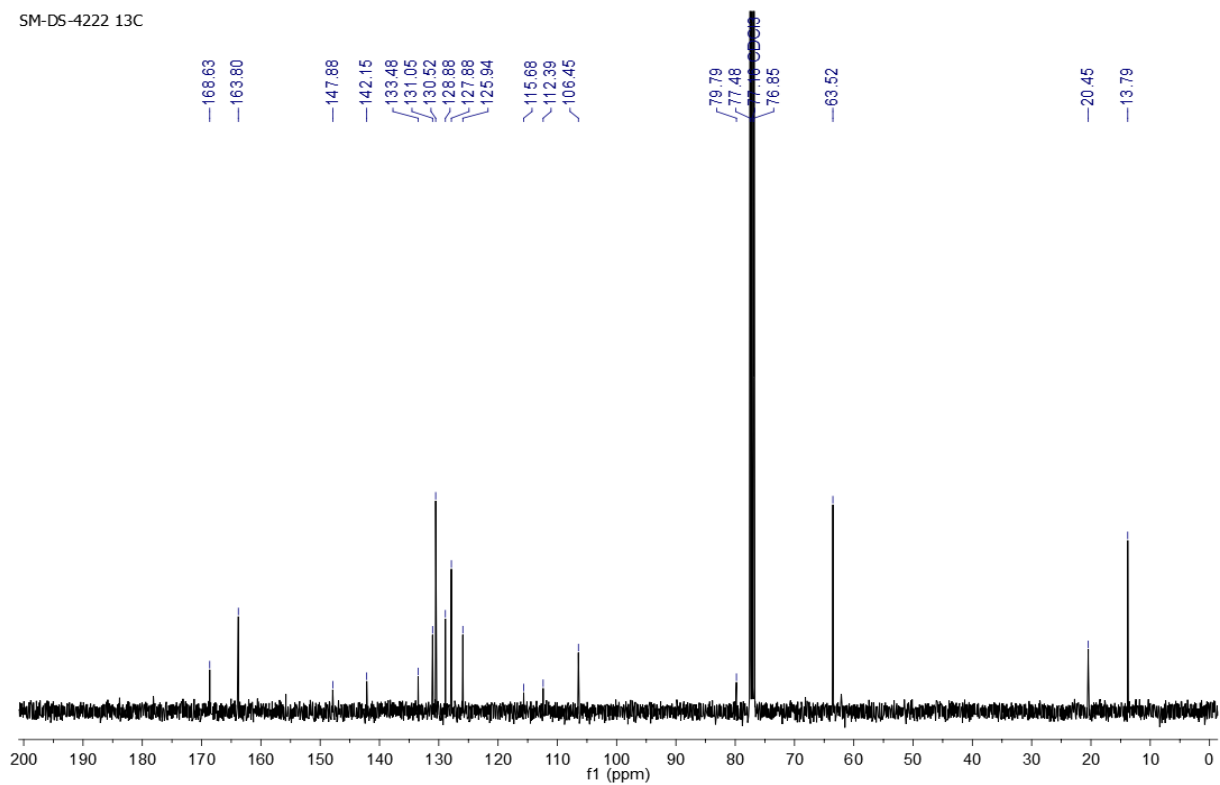

$^1\text{H}$  NMR of **4r** (400 MHz,  $\text{CDCl}_3$ ):

SM-DS-4249 1H

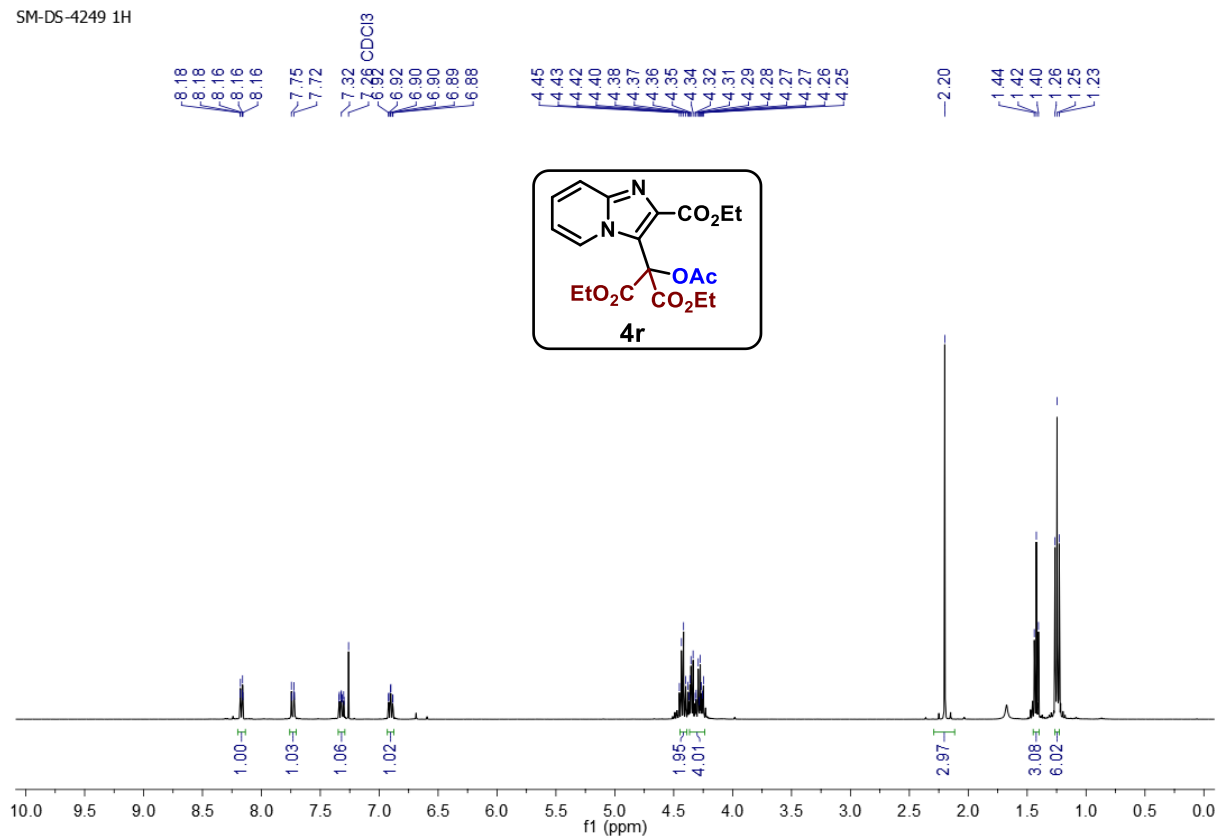

$^{13}\text{C}\{^1\text{H}\}$  NMR of **4r** (101 MHz,  $\text{CDCl}_3$ ):

SM-DS-4249 13C

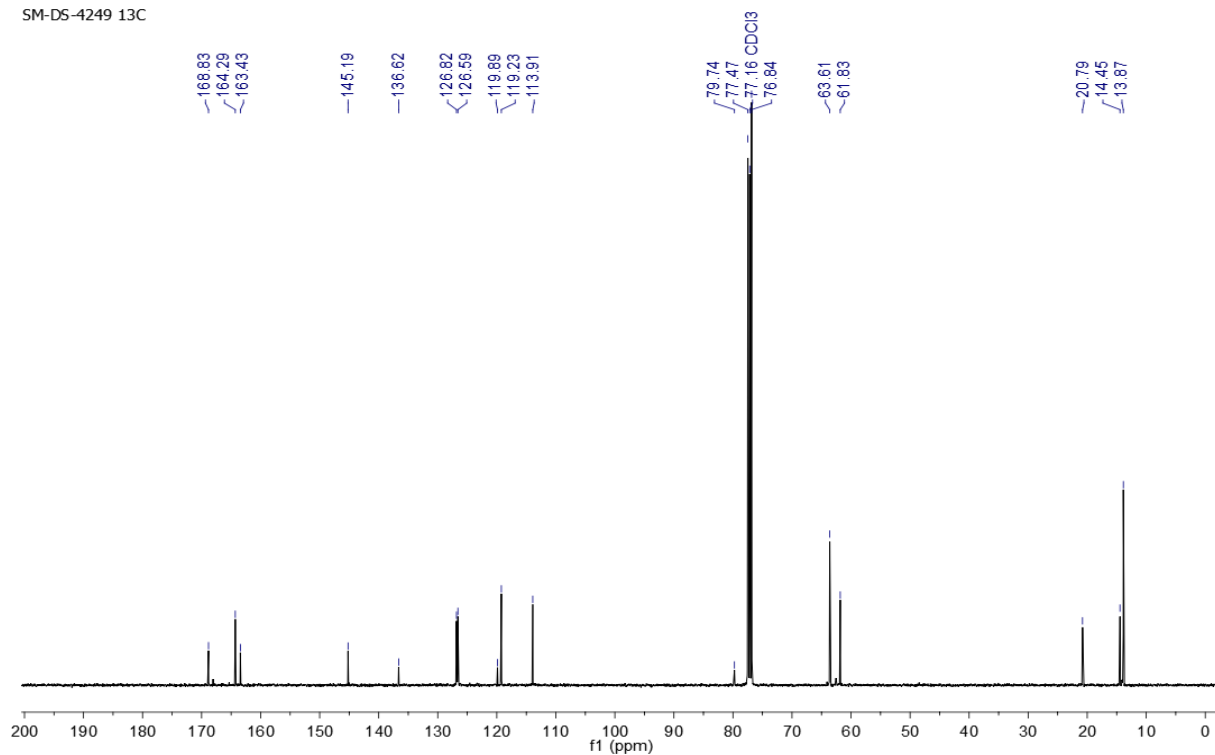

$^1\text{H}$  NMR of **4s** (400 MHz,  $\text{CDCl}_3$ ):

SM-DS-4284 1H

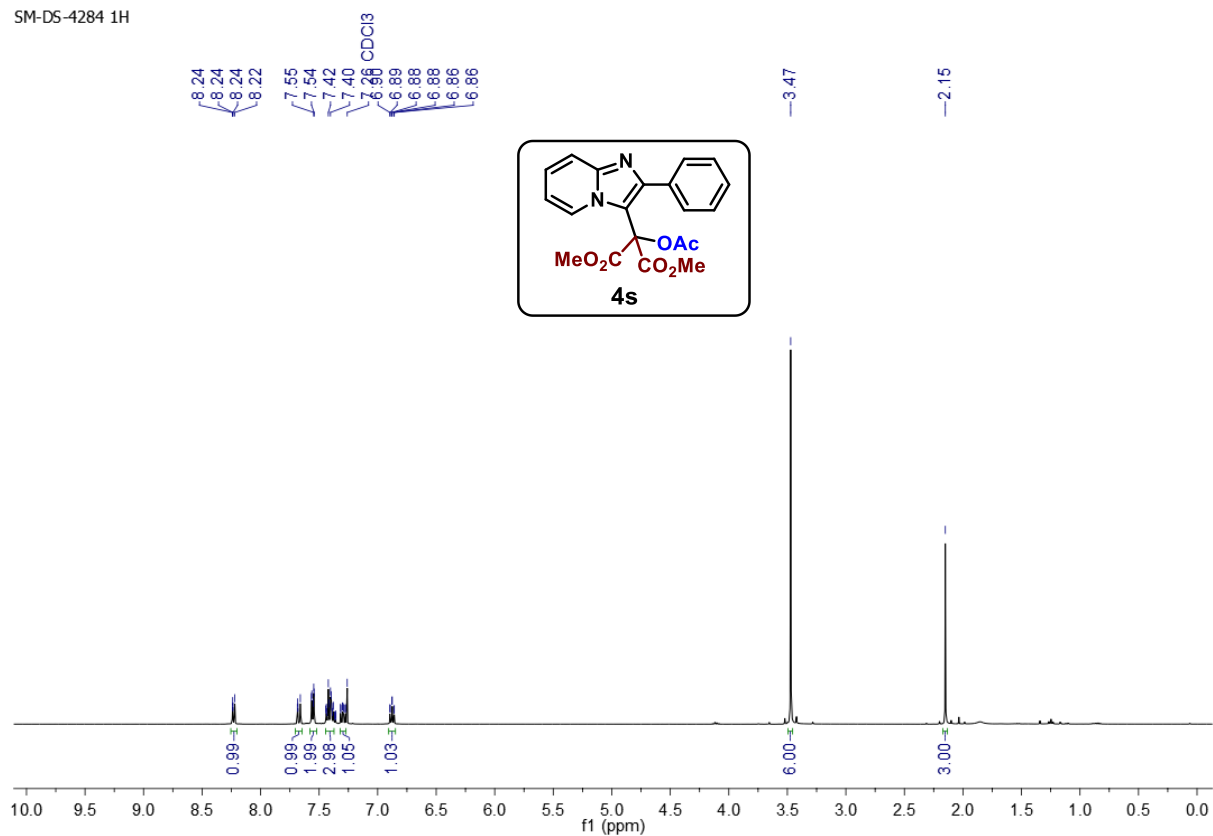

$^{13}\text{C}\{^1\text{H}\}$  NMR of **4s** (101 MHz,  $\text{CDCl}_3$ ):

SM-DS-4284 13C

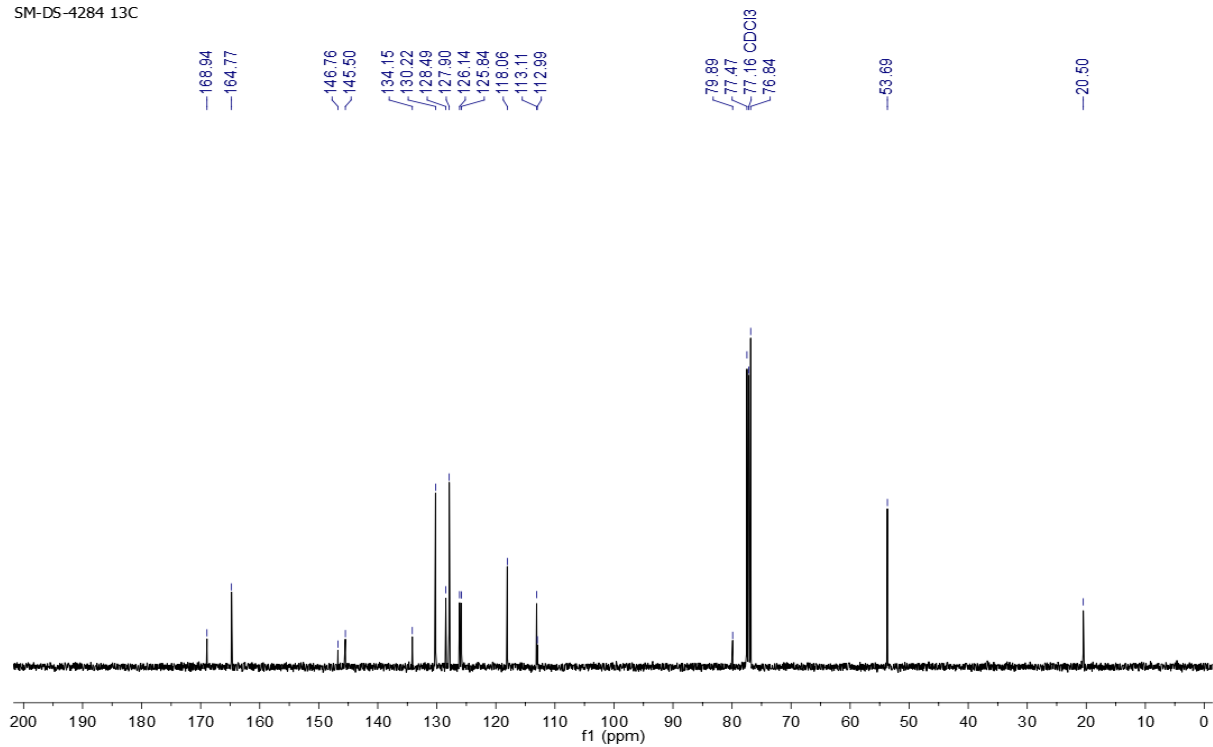

$^1\text{H}$  NMR of **4t** (400 MHz,  $\text{CDCl}_3$ ):

SM-DS-4289 1H

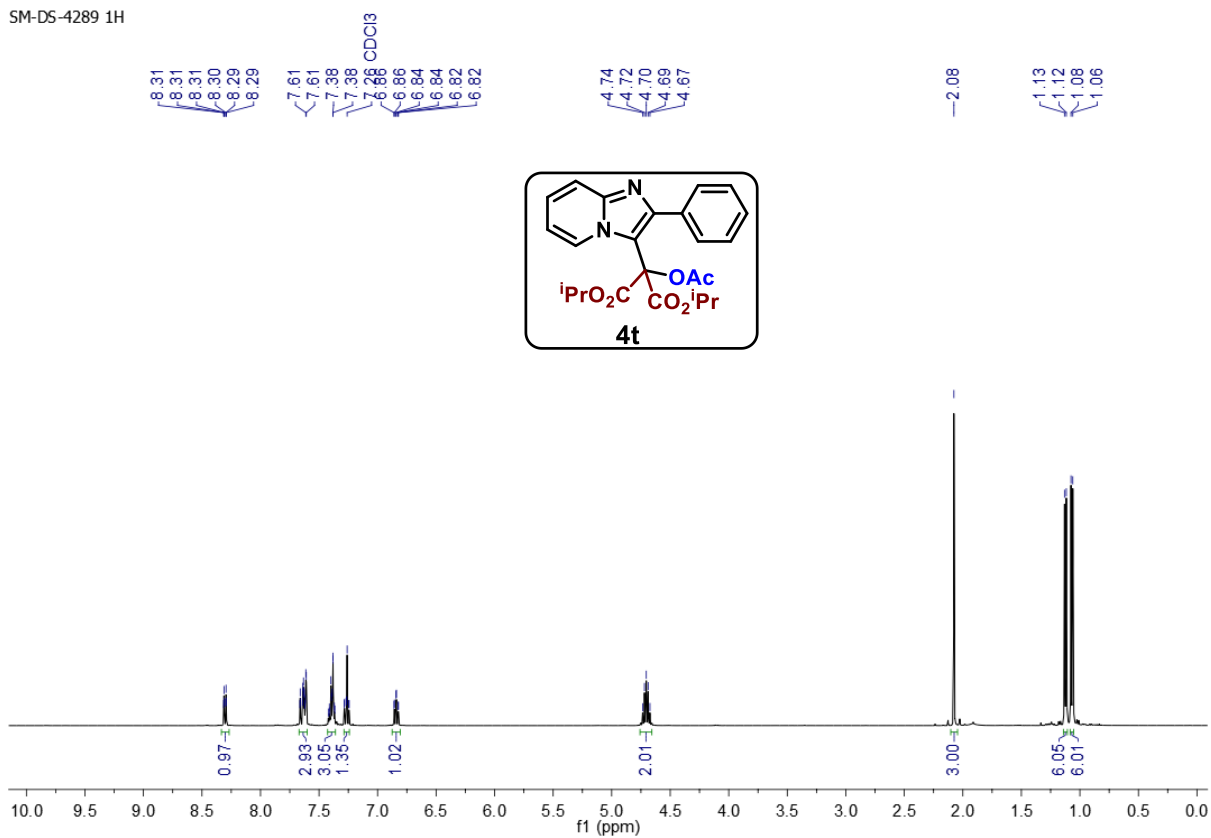

$^{13}\text{C}\{^1\text{H}\}$  NMR of **4t** (101 MHz,  $\text{CDCl}_3$ ):

SM-DS-4289 13C

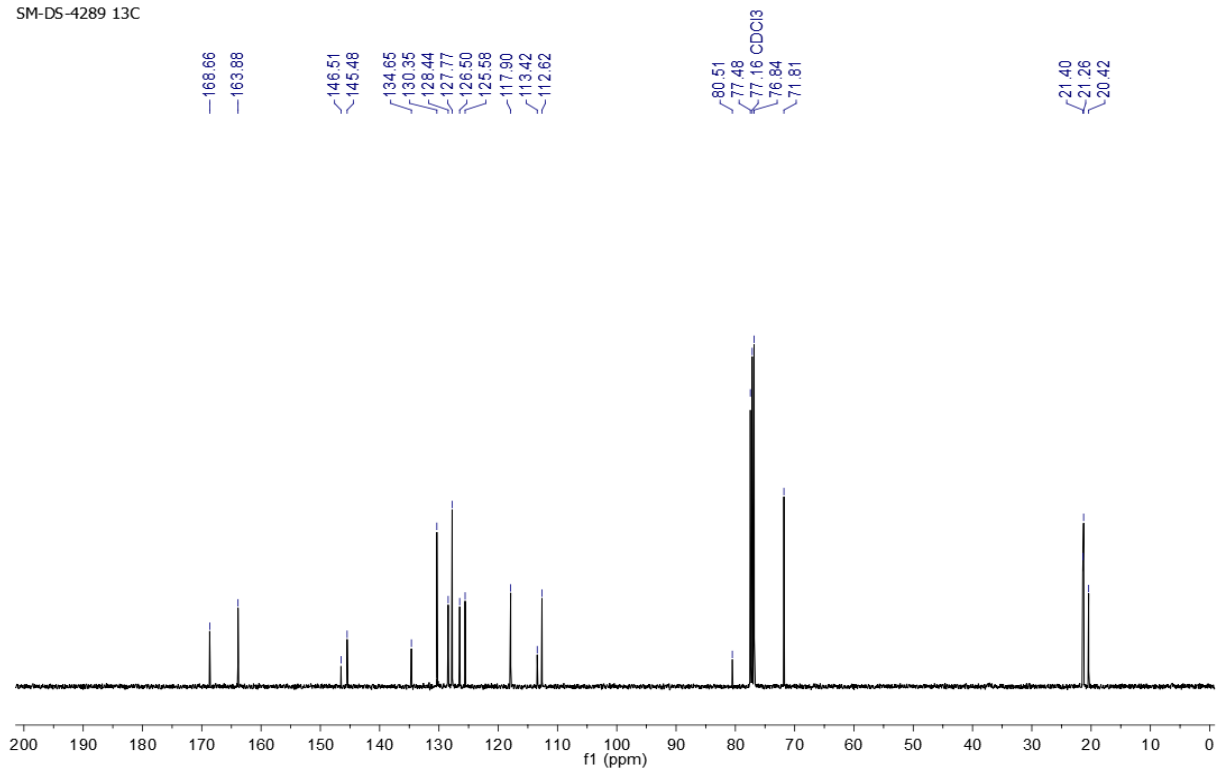

$^1\text{H}$  NMR of **4u** (400 MHz,  $\text{CDCl}_3$ ):

SM-DS-4216 1H

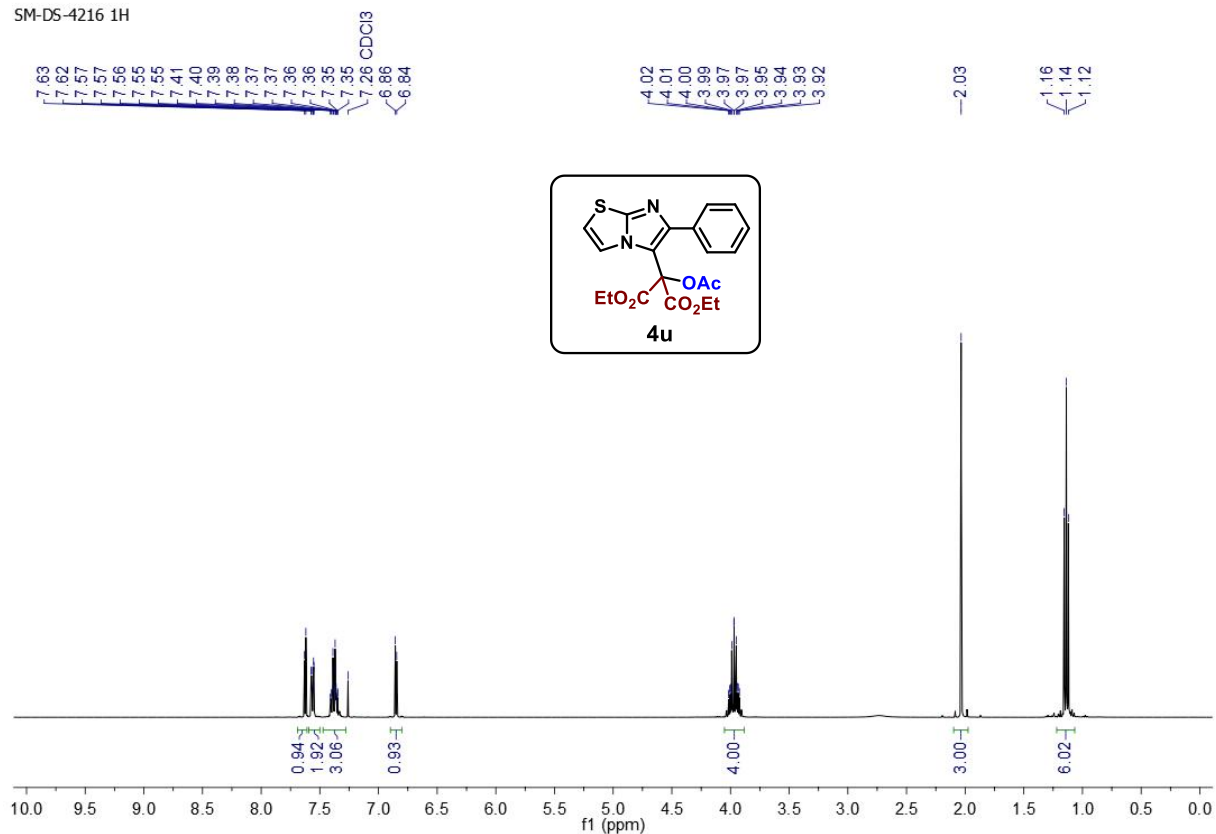

$^{13}\text{C}\{^1\text{H}\}$  NMR of **4u** (101 MHz,  $\text{CDCl}_3$ ):

SM-DS-4216 13C

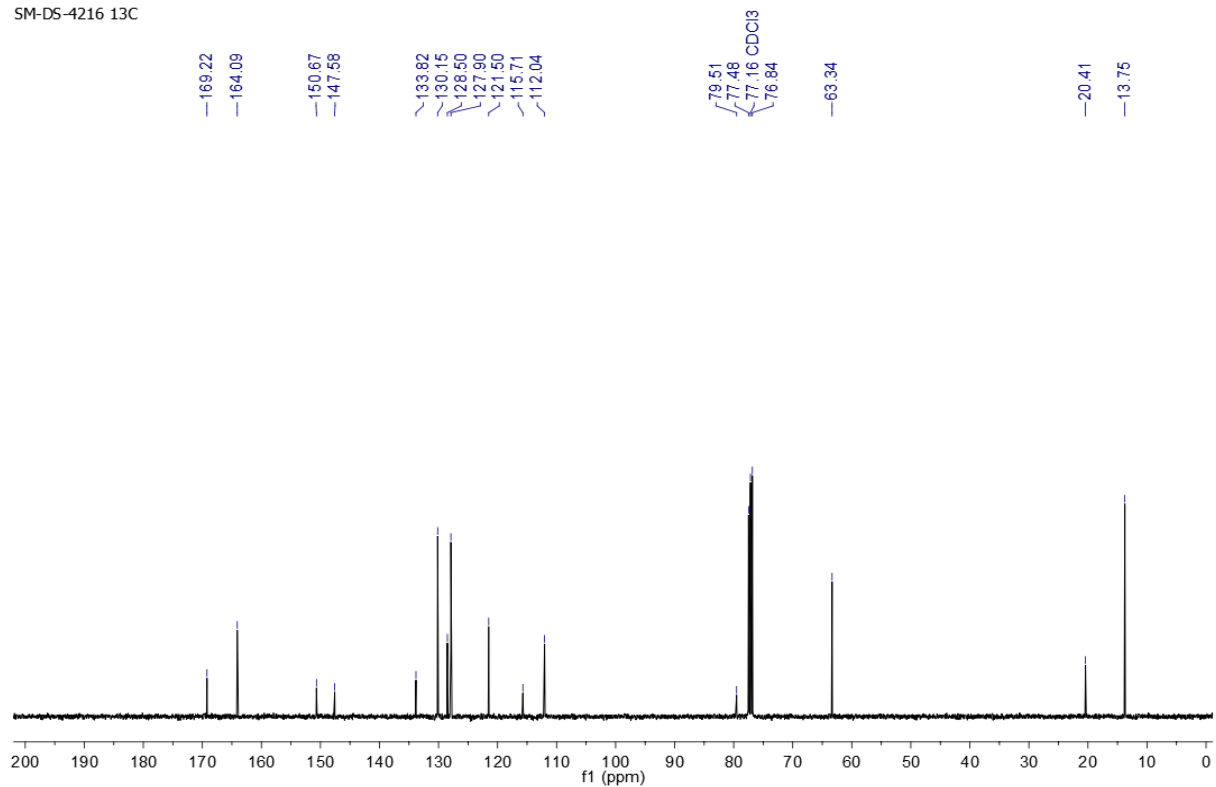

$^1\text{H}$  NMR of **4v** (400 MHz,  $\text{CDCl}_3$ ):

SM-DS-4223 1H

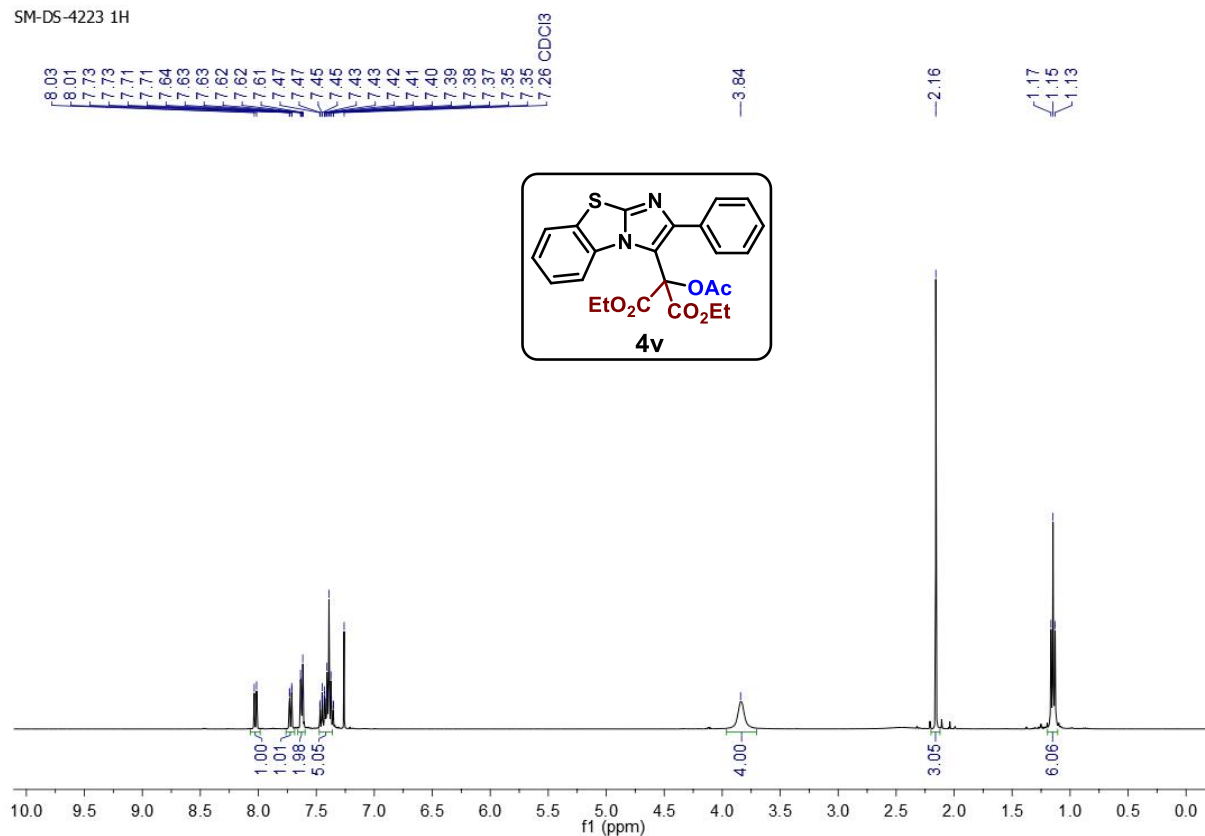

$^{13}\text{C}\{^1\text{H}\}$  NMR of **4v** (101 MHz,  $\text{CDCl}_3$ ):

SM-DS-4223 13C

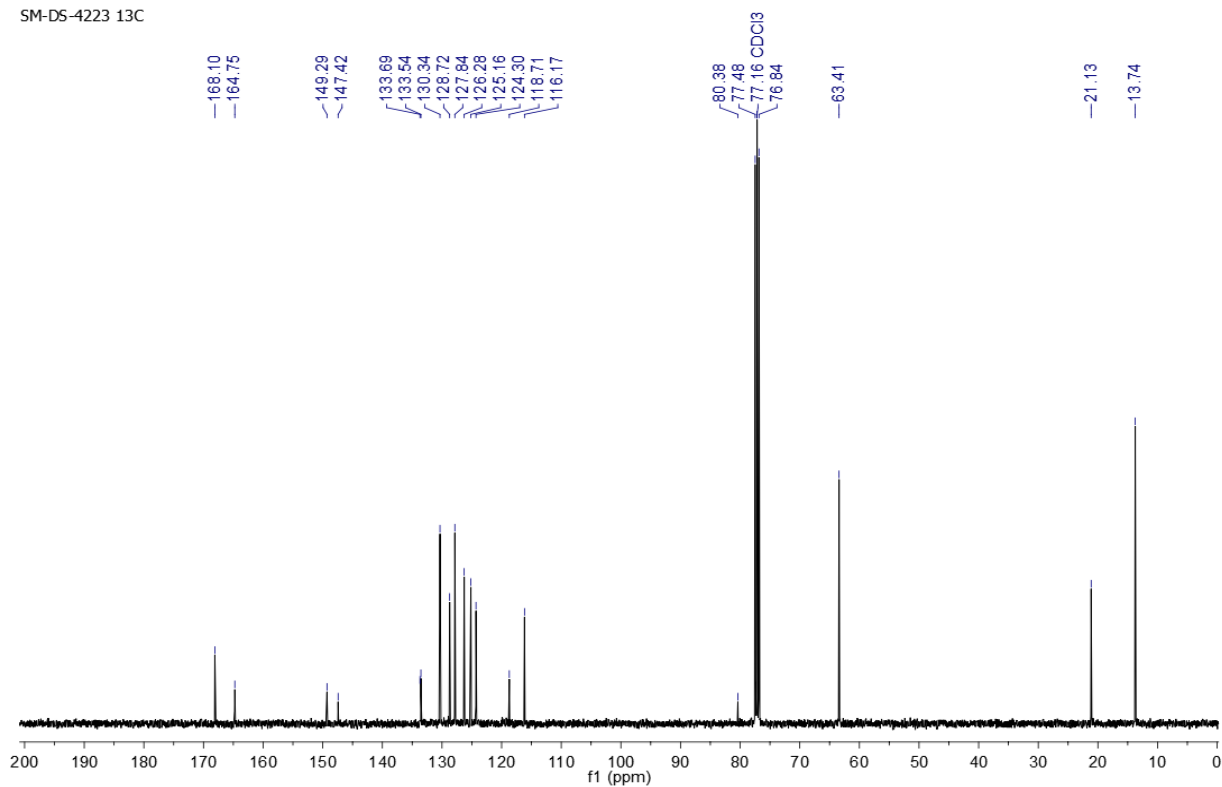

$^1\text{H}$  NMR of **4w** (400 MHz,  $\text{CDCl}_3$ ):

SM-DS-4217 1H

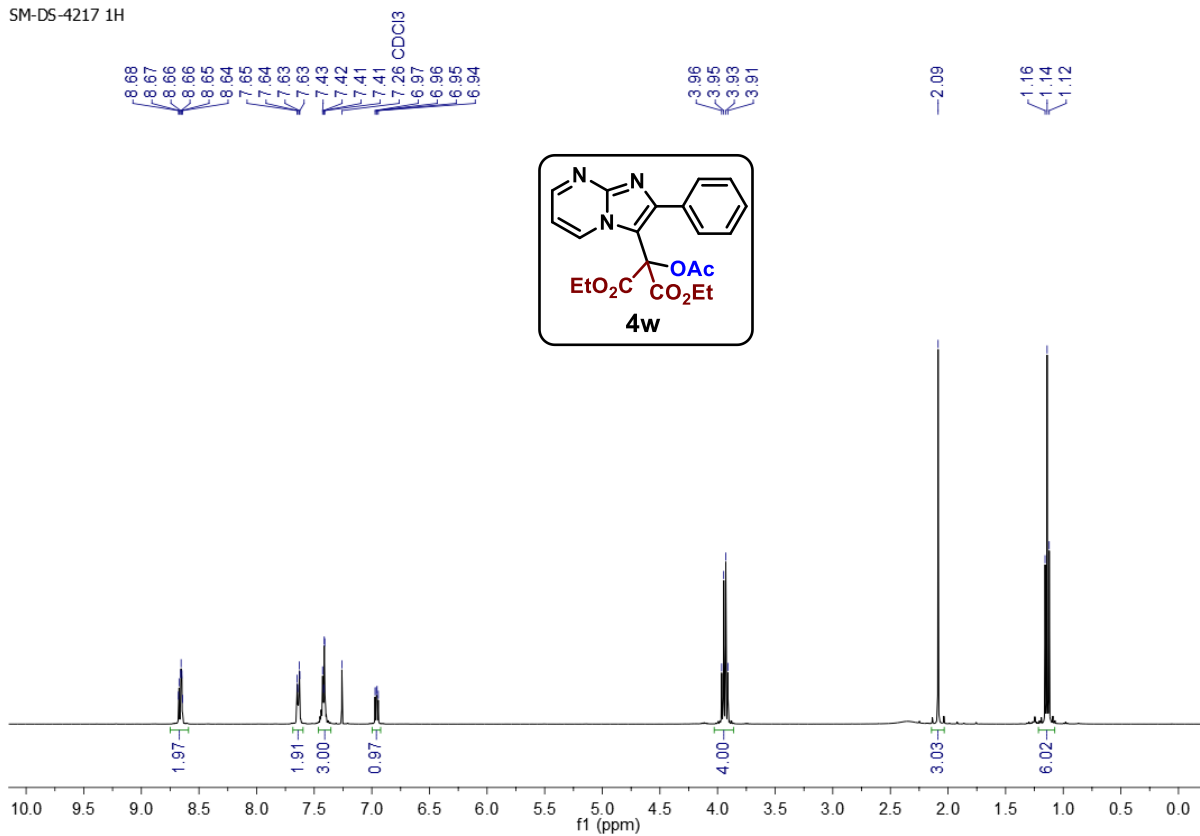

$^{13}\text{C}\{^1\text{H}\}$  NMR of **4w** (101 MHz,  $\text{CDCl}_3$ ):

SM-DS-4217 13C

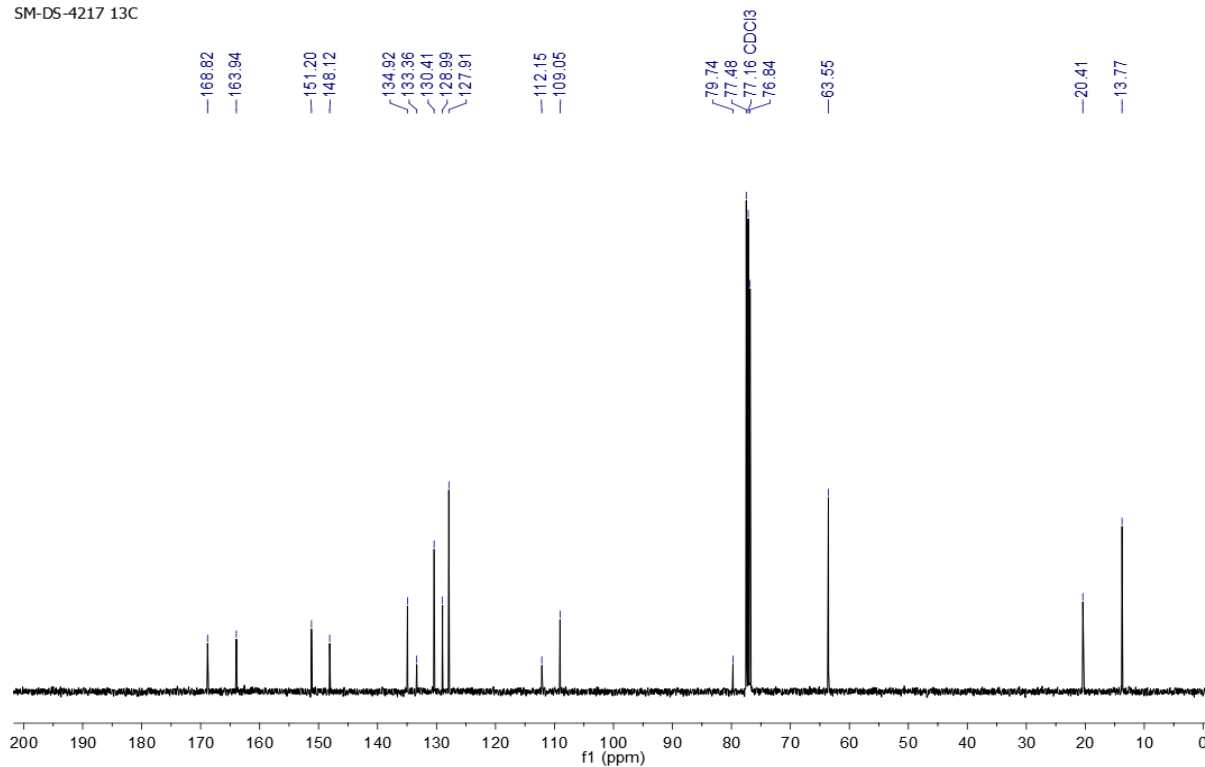

$^1\text{H}$  NMR of **4x** (400 MHz,  $\text{CDCl}_3$ ):

SM-DS-4330-S 1H

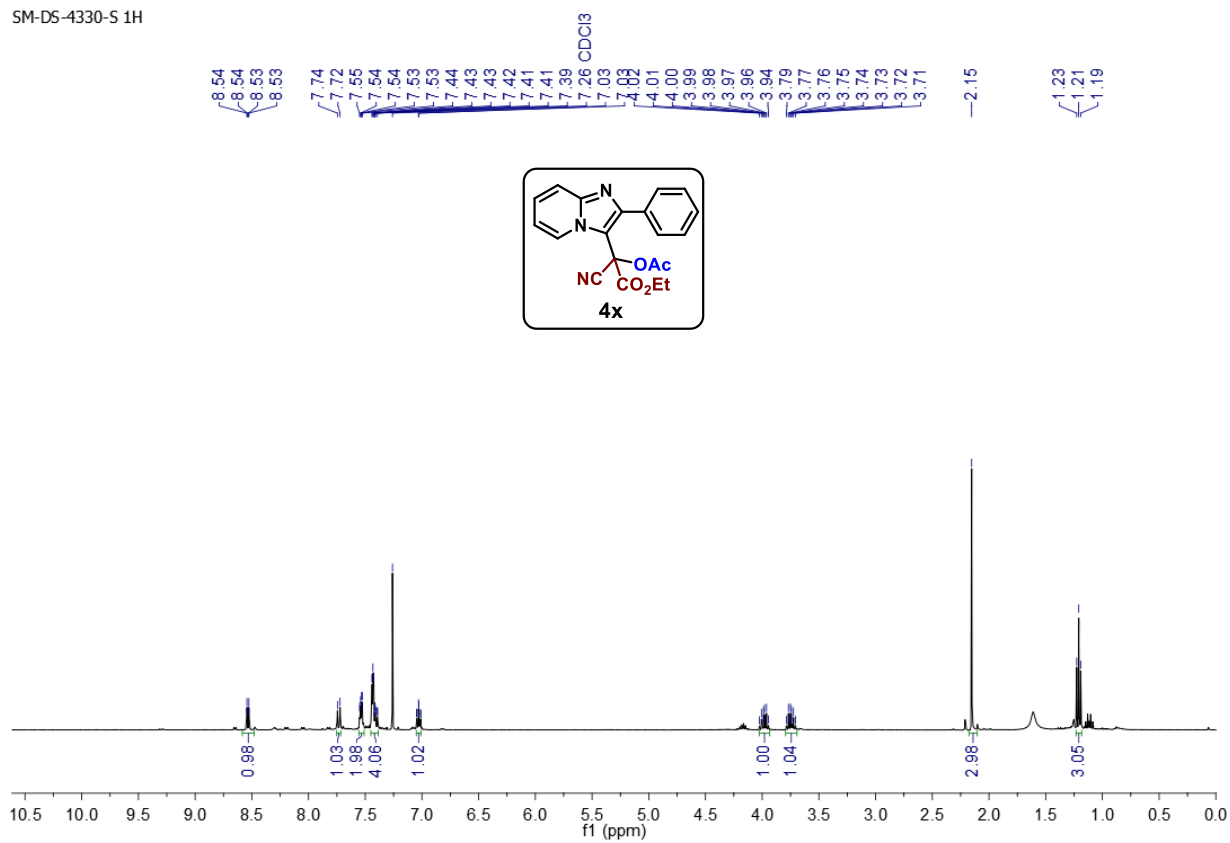

$^{13}\text{C}\{^1\text{H}\}$  NMR of **4x** (101 MHz,  $\text{CDCl}_3$ ):

SM-DS-4330-S-R 13C

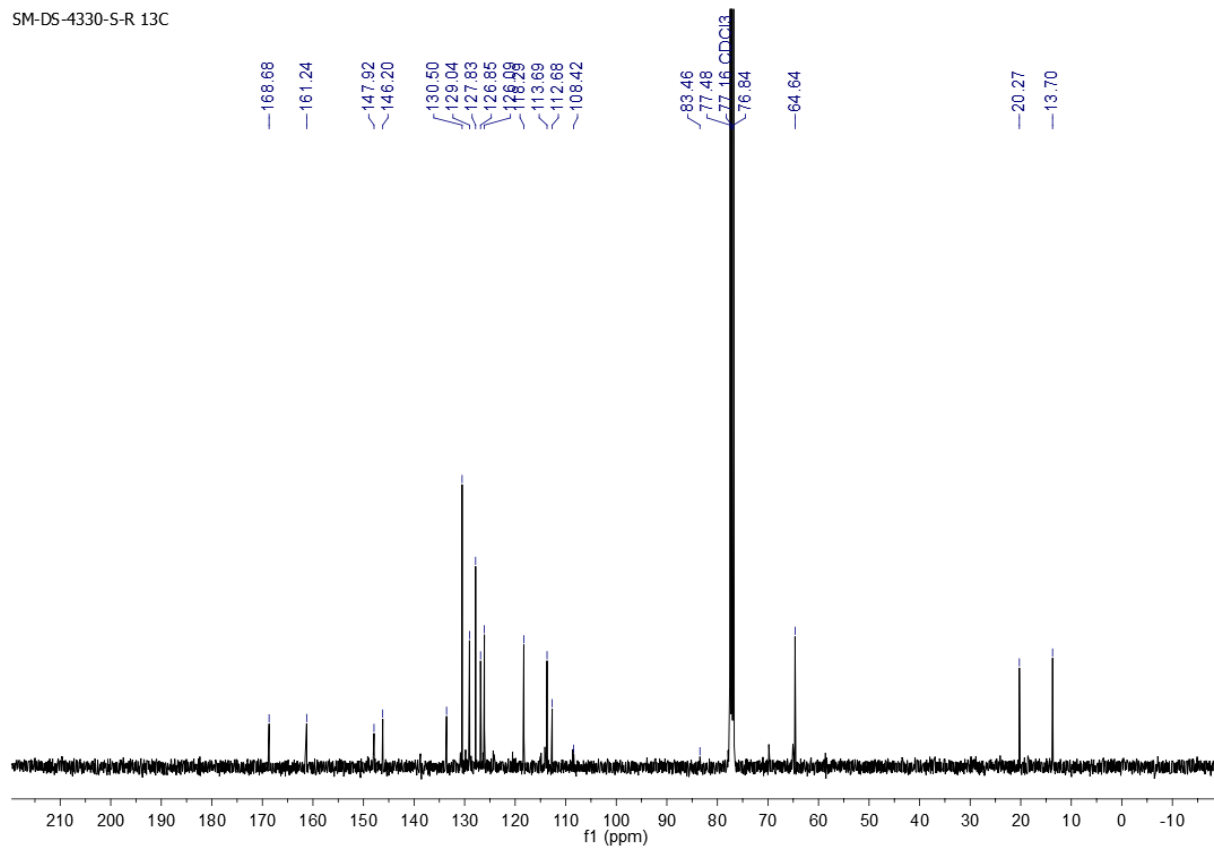



$^1\text{H}$  NMR of **4y** (400 MHz,  $\text{CDCl}_3$ ):

SM-DS-4329 1H

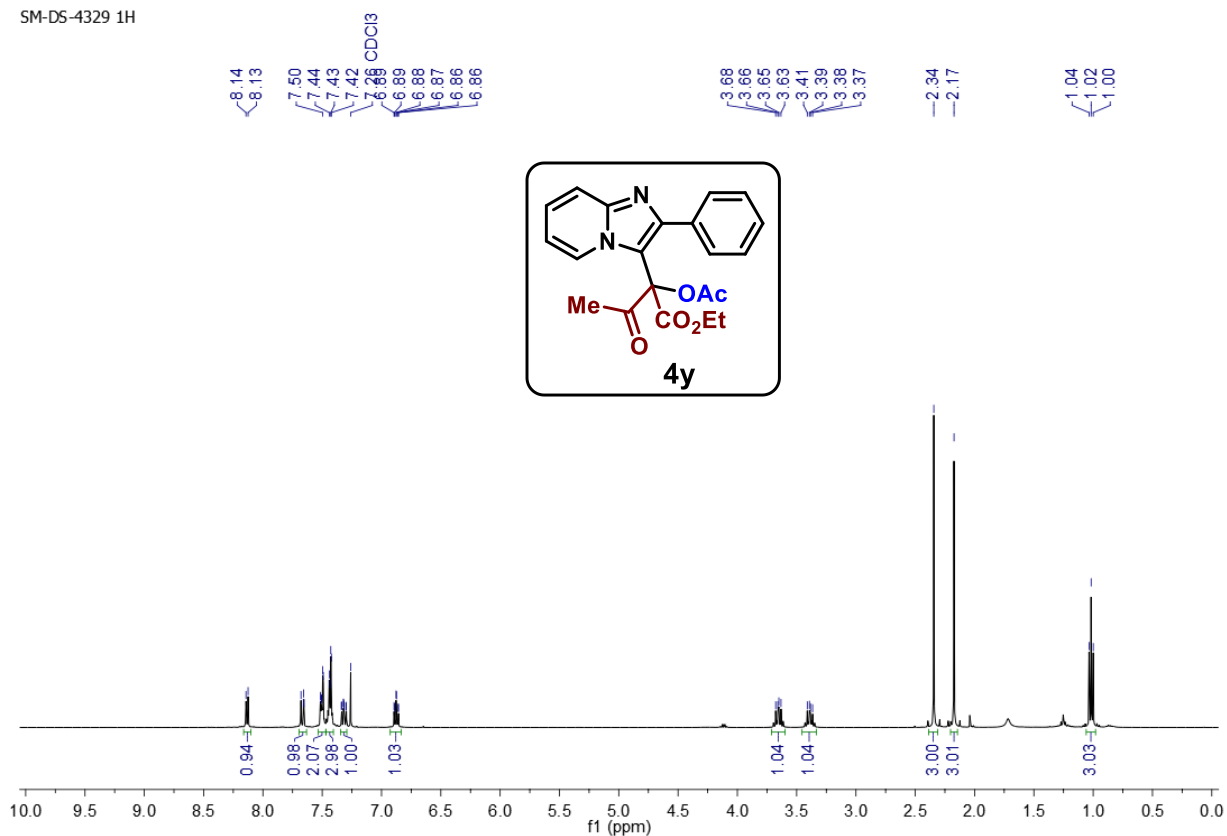

$^{13}\text{C}\{^1\text{H}\}$  NMR of **4y** (101 MHz,  $\text{CDCl}_3$ ):

SM-DS-4329 13C

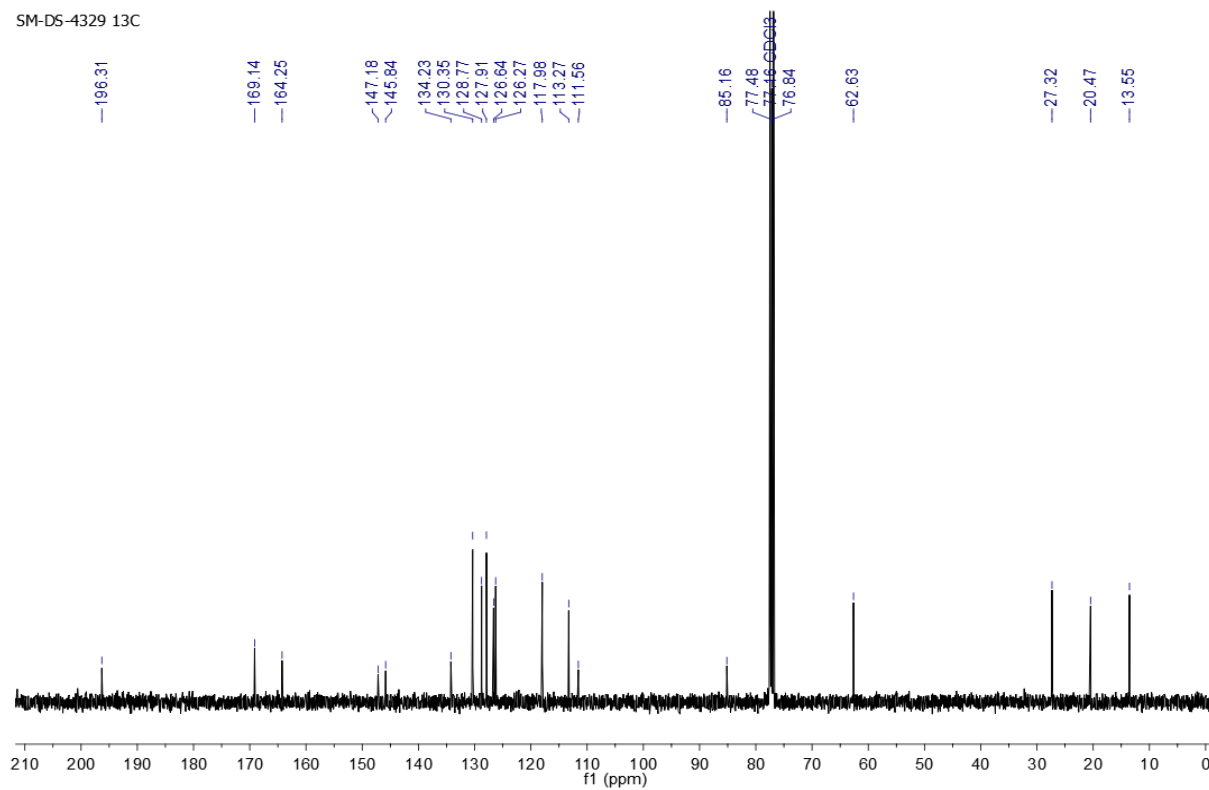

$^1\text{H}$  NMR of **5** (400 MHz,  $\text{CDCl}_3$ ):

SM-DS-4241 1H

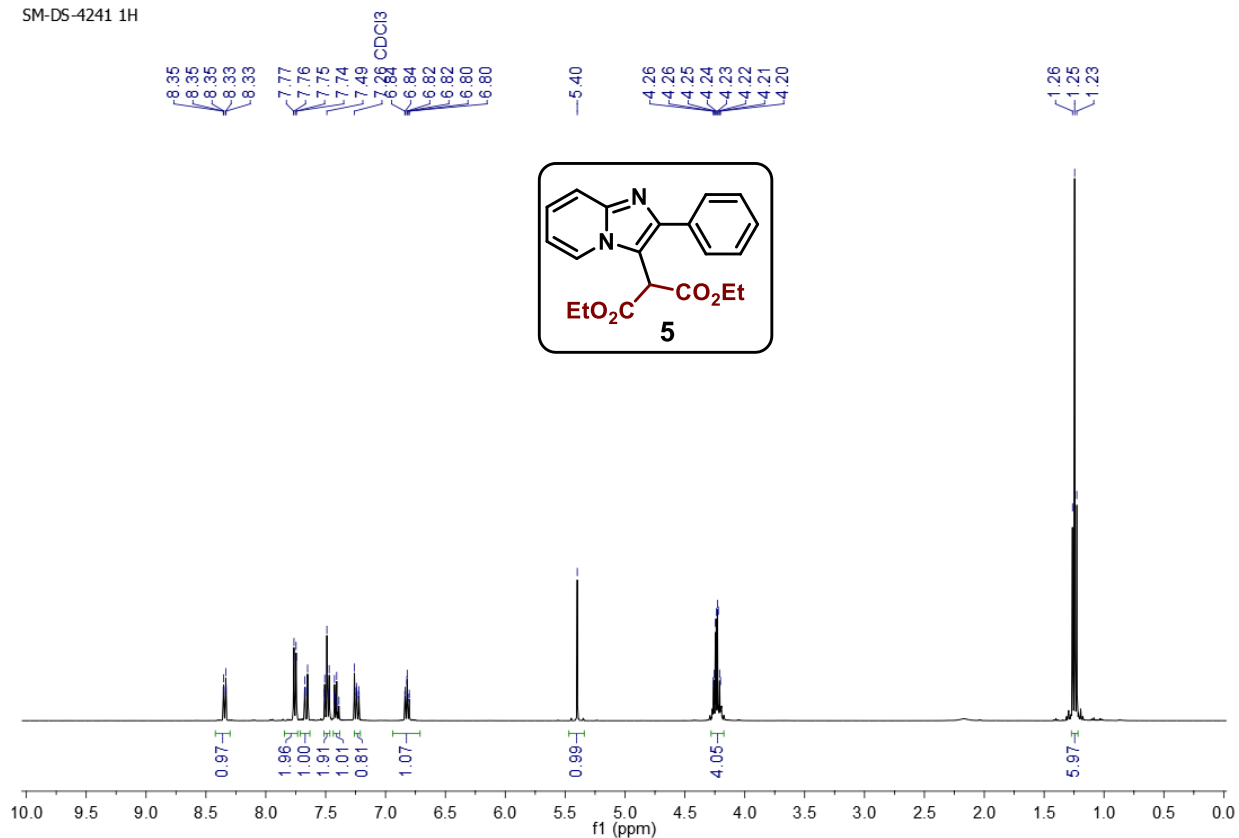

$^{13}\text{C}\{^1\text{H}\}$  NMR of **5** (101 MHz,  $\text{CDCl}_3$ ):

SM-DS-4241 13C

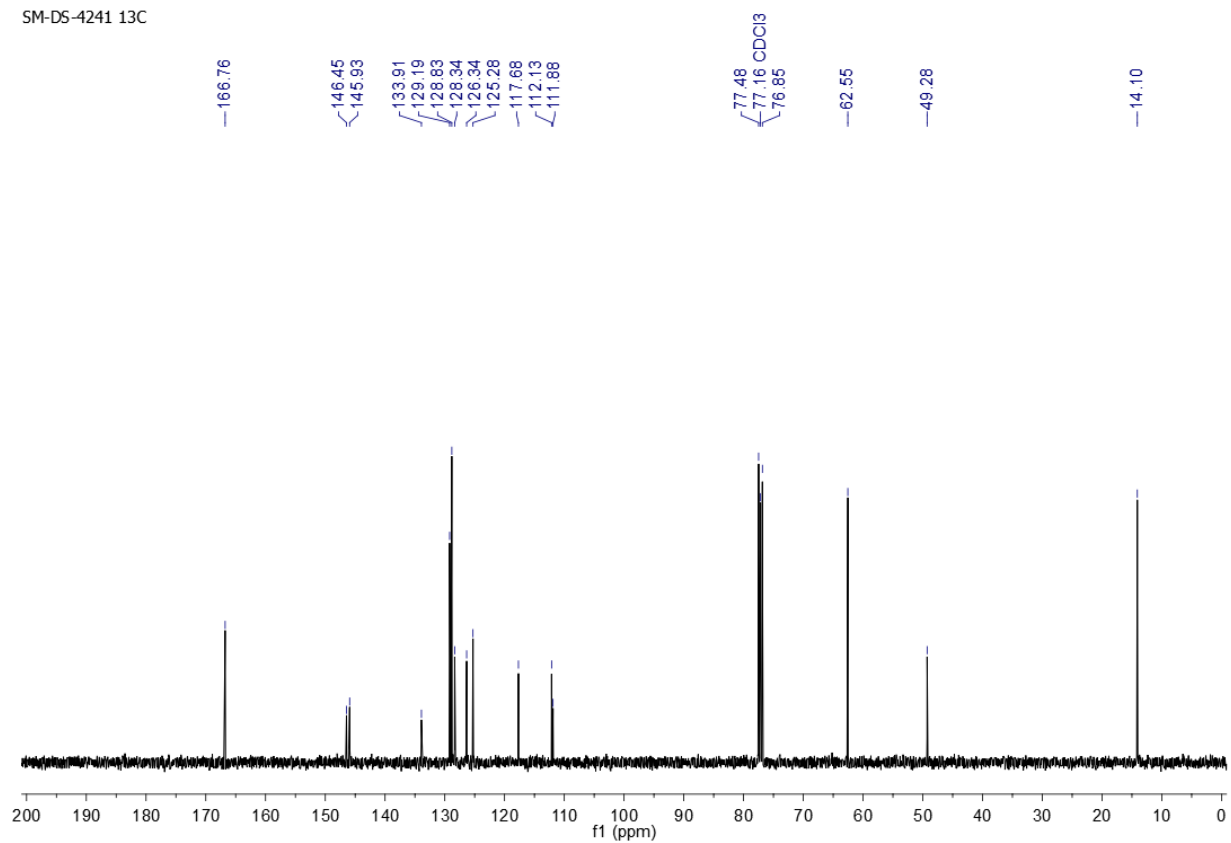

$^1\text{H}$  NMR of **6** (400 MHz,  $\text{CDCl}_3$ ):

SM-DS-4330-U 1H

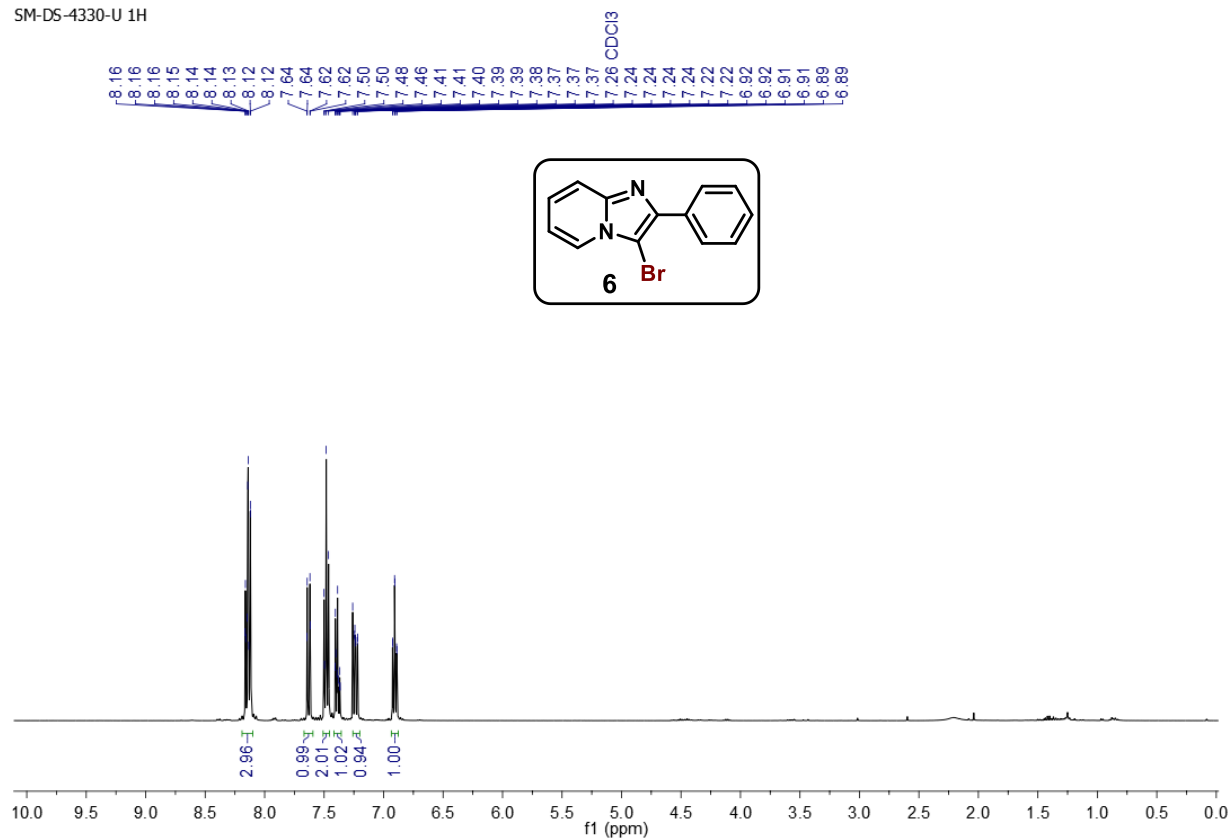

$^{13}\text{C}\{^1\text{H}\}$  NMR of **6** (101 MHz,  $\text{CDCl}_3$ ):

SM-DS-4330-U 13C

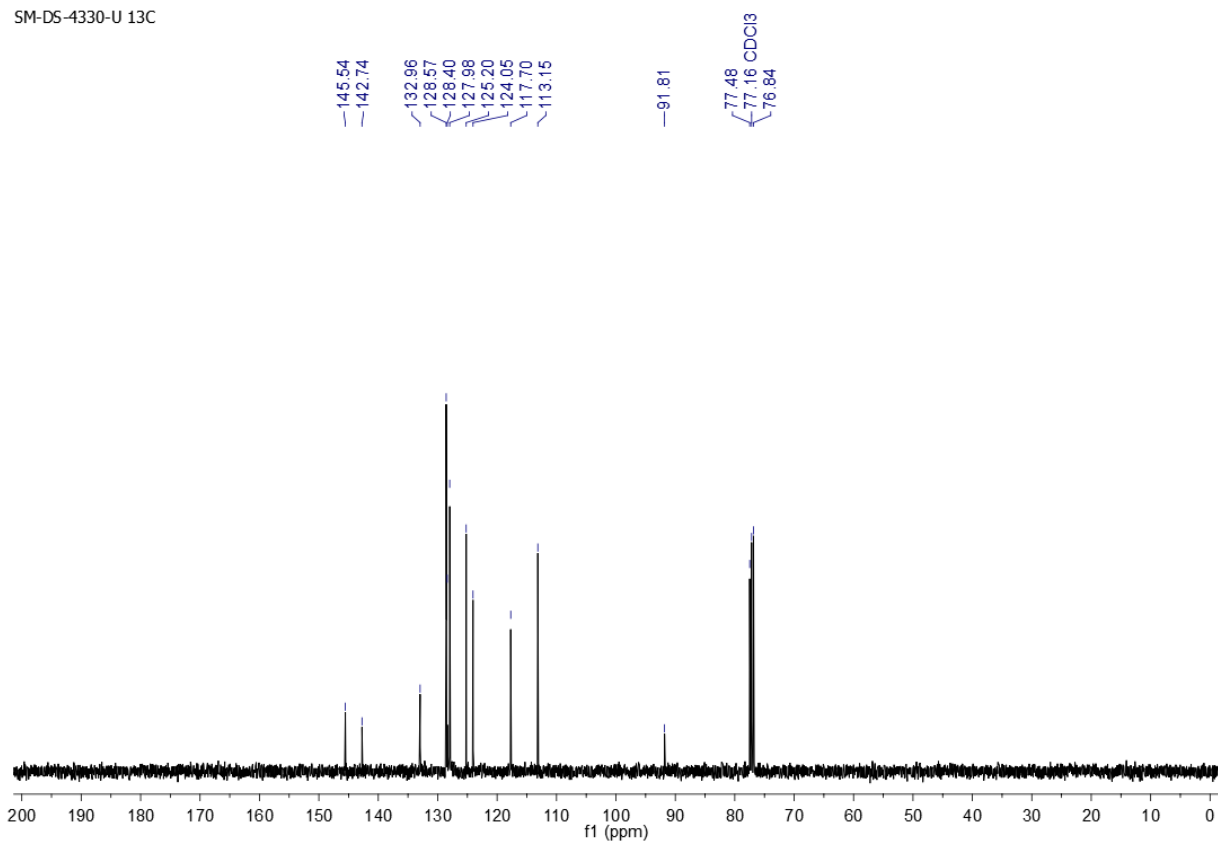

$^1\text{H}$  NMR of **9** (400 MHz,  $\text{CDCl}_3$ ):

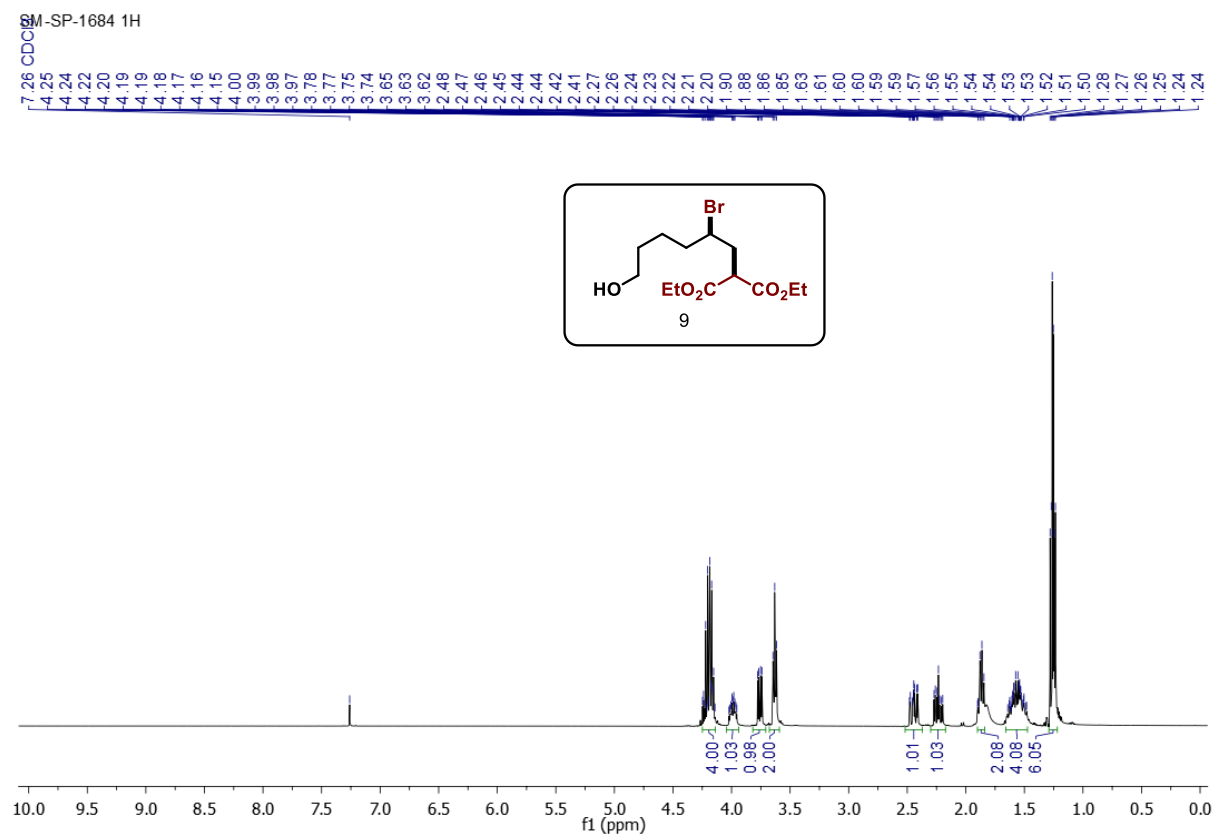

$^{13}\text{C}\{^1\text{H}\}$  NMR of **9** (101 MHz,  $\text{CDCl}_3$ ):

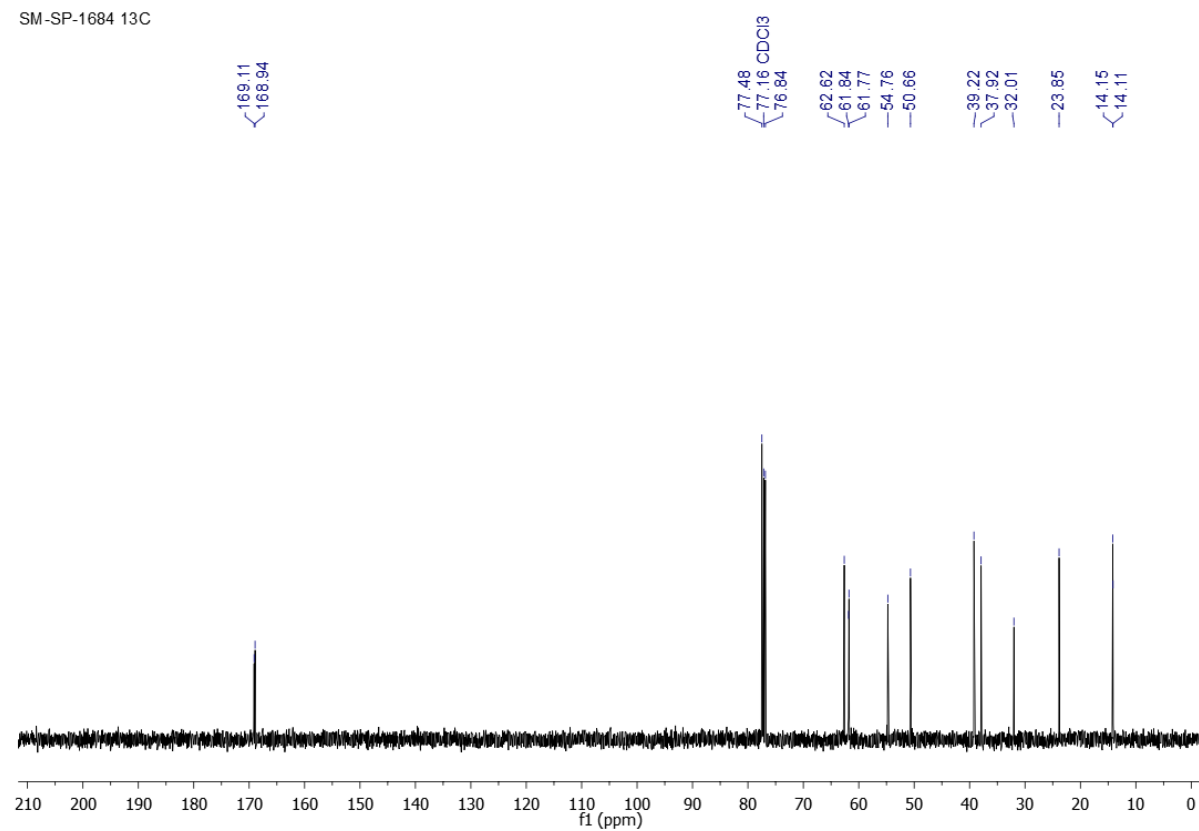

$^1\text{H}$  NMR of **10** (400 MHz,  $\text{CDCl}_3$ ):

SM-DS-4269-P-1 1H

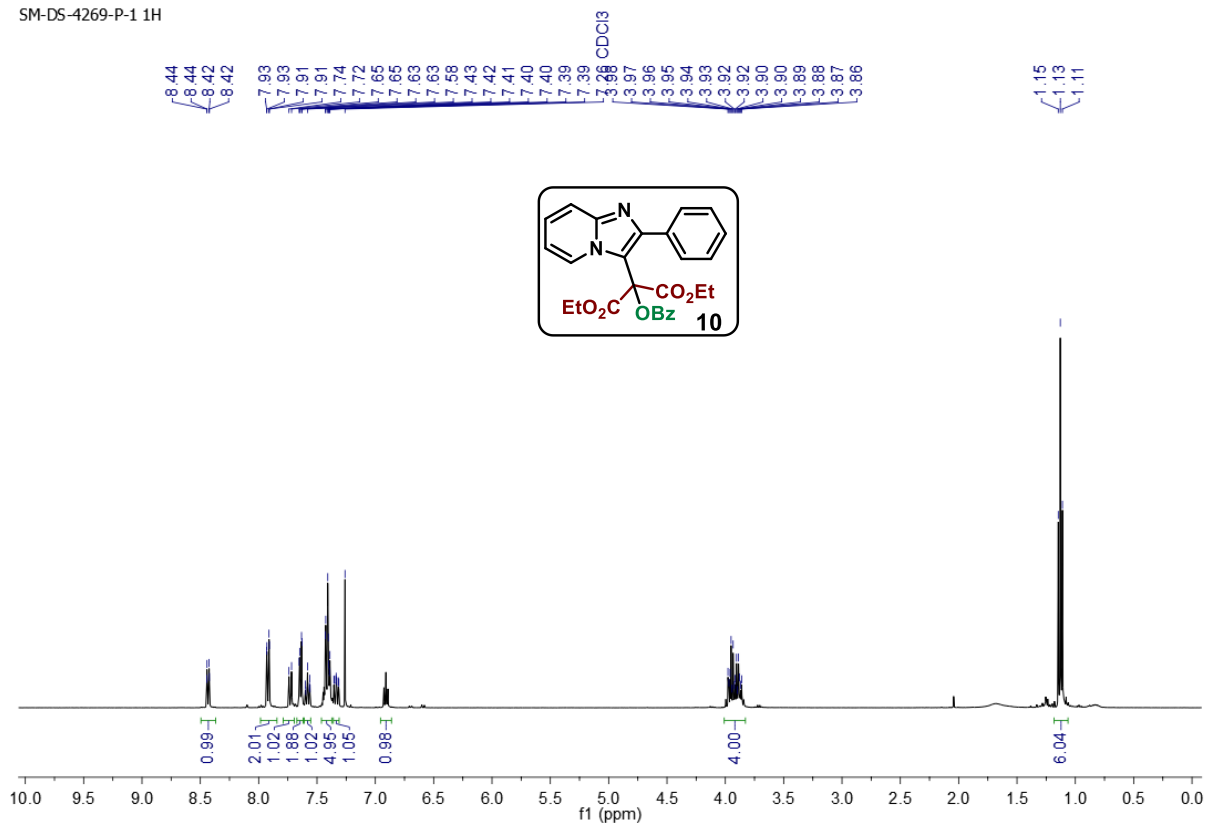

$^{13}\text{C}\{^1\text{H}\}$  NMR of **10** (101 MHz,  $\text{CDCl}_3$ ):

SM-DS-4269-P-1 13C

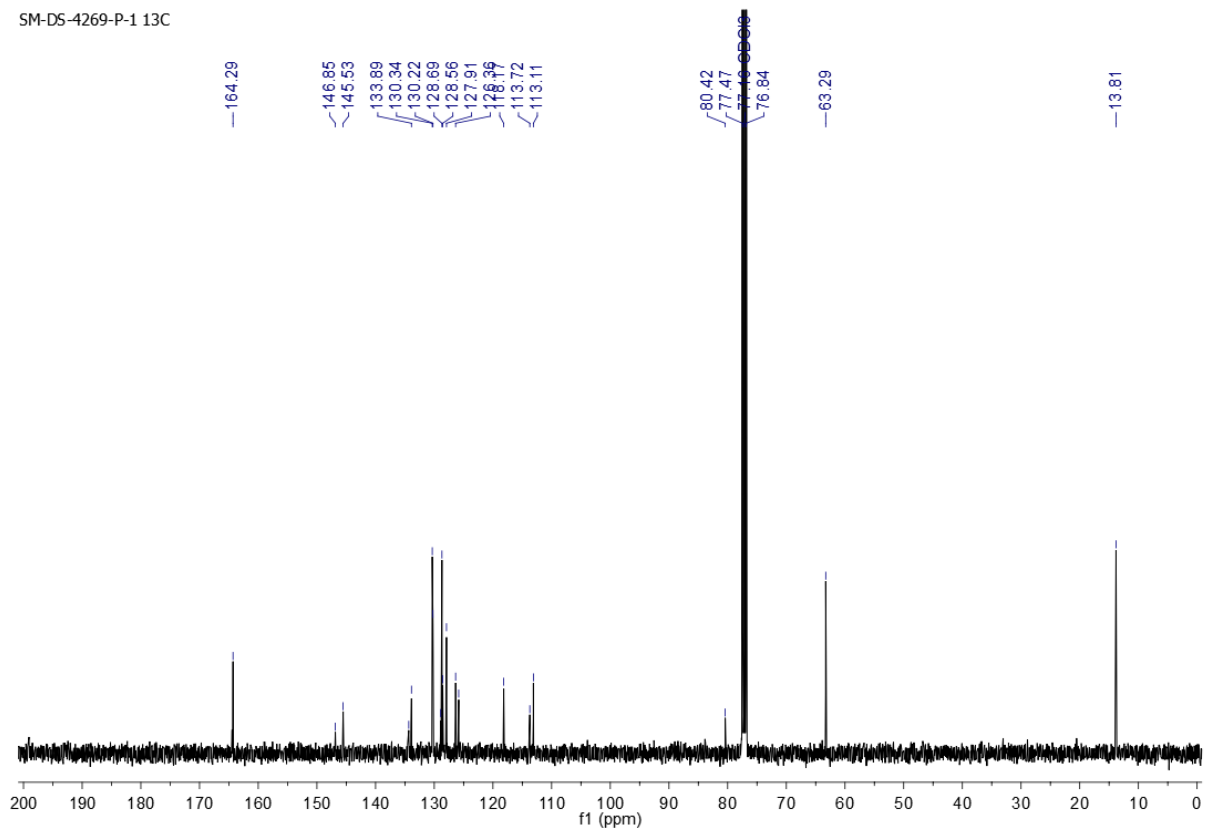

$^1\text{H}$  NMR of *N*-(pyridin-2-yl)benzamide (400 MHz,  $\text{CDCl}_3$ ):

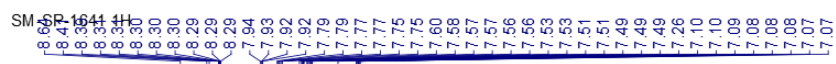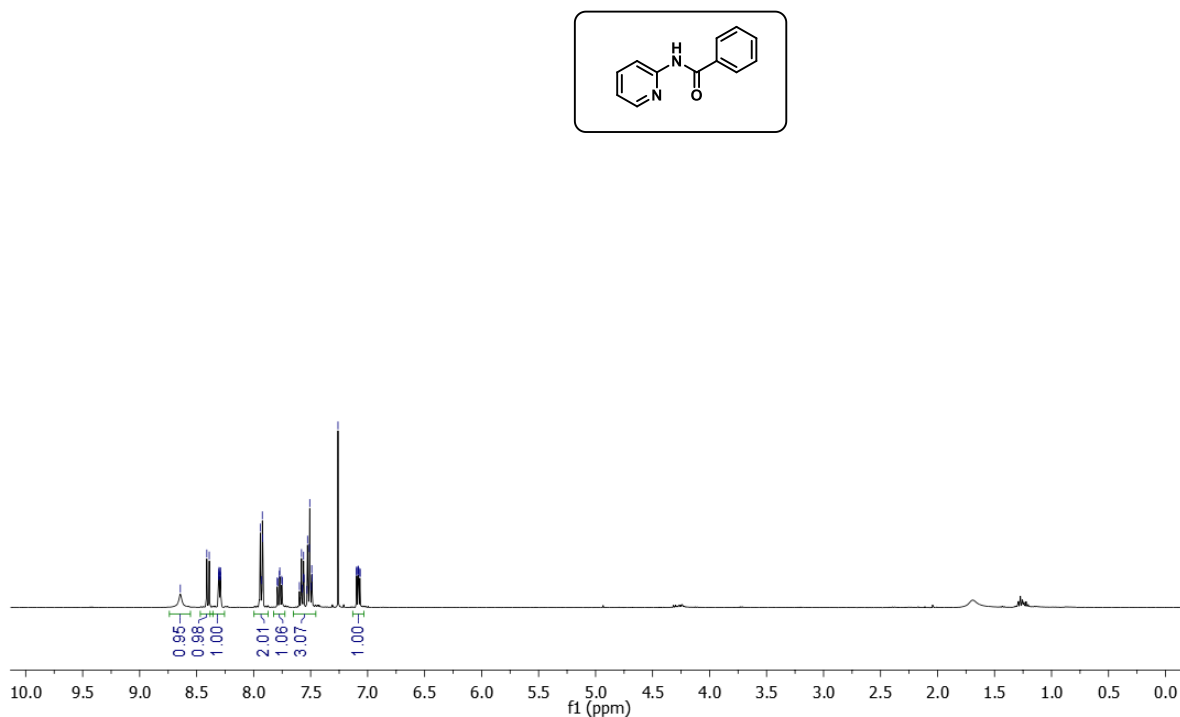

$^{13}\text{C}\{^1\text{H}\}$  NMR of *N*-(pyridin-2-yl)benzamide (101 MHz,  $\text{CDCl}_3$ ):

SM-SP-1641 13C

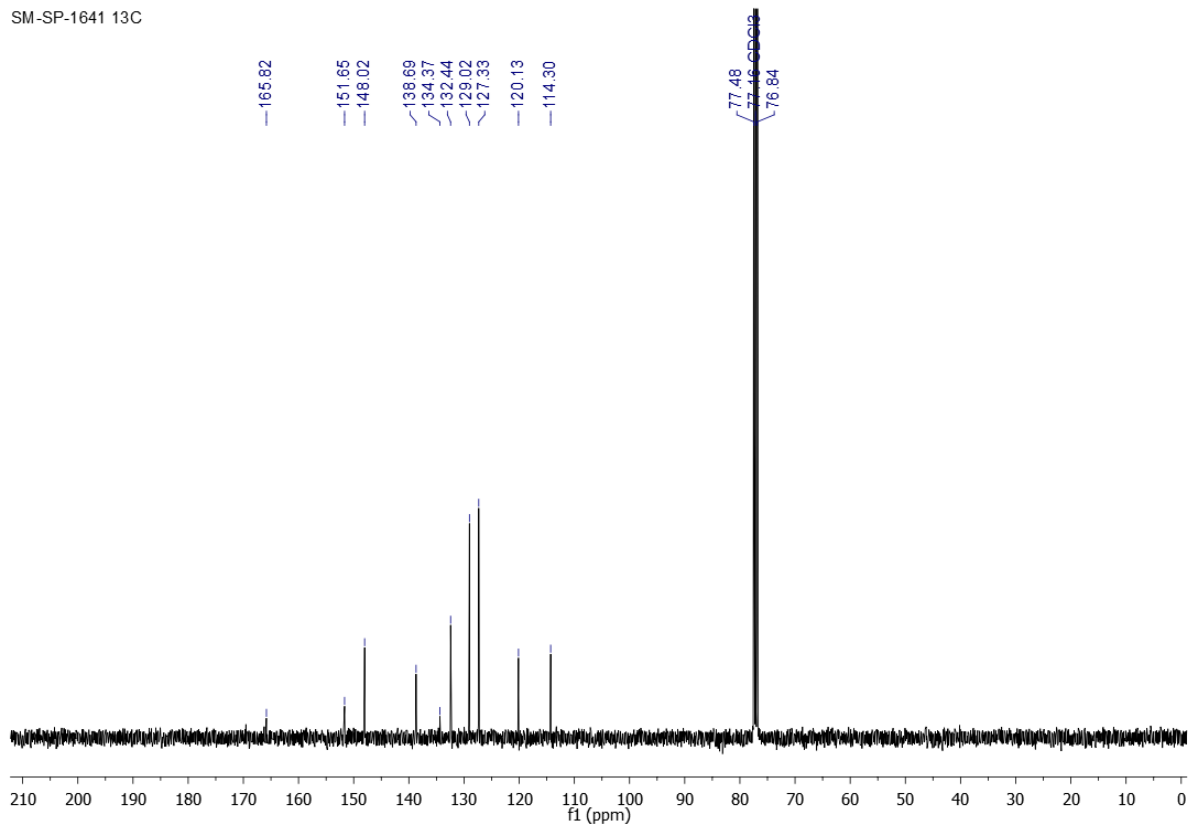

Supplement: Additional file 1 [file 1860-5397-19-48-S1.pdf]
